# Supplementary material for: Genome-wide evolution and expression analysis of the MYB-CC gene family in Brassica spp
Source: PeerJ. 2022 Feb 25;10:e12882. doi: 10.7717/peerj.12882 (PMC8884064; doi:10.7717/peerj.12882)
Supplement: Supplemental Information 1 [file peerj-10-12882-s001.xlsx]

## Sheet: Sheet1
Table S1 MYB-CC gene family in B. rapa
Gene Name	Gene symbol	Length(aa)	MW(Da)	pI	Chr.Location
BraMYB-CC01	Bra011042	378	41123	5.35	chrA01:4276343:4278188
BraMYB-CC02	Bra028359	292	31669.7	6.01	chrA01:18051587:18053983
BraMYB-CC03	Bra036412	394	44506.1	7.27	chrA01:26100453:26102141
BraMYB-CC04	Bra028717	375	42265	6.69	chrA02:1013605:1015989
BraMYB-CC05	Bra007867	324	36741.3	6.29	chrA02:10424130:10425654
BraMYB-CC06	Bra008411	346	38695.6	8.36	chrA02:14448839:14450394
BraMYB-CC07	Bra020622	402	44636.4	4.99	chrA02:23603013:23604821
BraMYB-CC08	Bra005912	372	42019.9	6.7	chrA03:1182076:1184456
BraMYB-CC09	Bra001484	313	35388.6	5.29	chrA03:16642077:16643523
BraMYB-CC10	Bra001927	294	32195.2	6.2	chrA03:19407620:19409410
BraMYB-CC11	Bra034737	188	21598.3	5.71	chrA05:21941042:21942257
BraMYB-CC12	Bra031952	392	44184.6	6.37	chrA05:24542503:24544266
BraMYB-CC13	Bra038033	364	40379.1	5.92	chrA06:14176:15771
BraMYB-CC14	Bra024909	287	31200.6	5.6	chrA06:23152155:23153543
BraMYB-CC15	Bra025071	280	31210	8.54	chrA06:23922226:23923776
BraMYB-CC16	Bra036469	348	39105	5.65	chrA07:196098:197730
BraMYB-CC17	Bra003611	343	38426.4	8.44	chrA07:17336273:17337859
BraMYB-CC18	Bra003993	322	36936.7	6.17	chrA07:19442476:19443983
BraMYB-CC19	Bra004397	331	37499.3	7.12	chrA07:21719980:21721478
BraMYB-CC20	Bra035118	355	39541.5	8.4	chrA07:25533834:25535426
BraMYB-CC21	Bra014348	316	34178.2	5.54	chrA08:1486575:1488621
BraMYB-CC22	Bra010355	396	43731.3	5.75	chrA08:13284955:13286628
BraMYB-CC23	Bra016289	313	36111.5	5.64	chrA08:16945939:16947733
BraMYB-CC24	Bra036679	329	37120.7	5.43	chrA09:6112182:6113879
BraMYB-CC25	Bra036123	406	45412.3	5.81	chrA09:2375493:2377248
BraMYB-CC26	Bra002145	392	44300.5	5.91	chrA10:11345982:11347757
BraMYB-CC27	Bra009228	374	42259.3	7.65	chrA10:14742689:14745119
BraMYB-CC28	Bra039340	234	26916.3	6.9	chrAnn
BraMYB-CC29	Bra039364	439	48828.3	5.49	chrAnn
BraMYB-CC30	Bra040196	399	44462.6	5.61	chrAnn
