# Supplementary material for: Genome-wide evolution and expression analysis of the MYB-CC gene family in Brassica spp
Source: PeerJ. 2022 Feb 25;10:e12882. doi: 10.7717/peerj.12882 (PMC8884064; doi:10.7717/peerj.12882)
Supplement: Supplemental Information 2 [file peerj-10-12882-s002.xlsx]

## Sheet: Sheet1
Table S2 MYB-CC gene family in B. oleracea
Gene Name	Gene symbol	Length(aa)	MW(Da)	pI	chr.Location
BolMYB-CC01	Bol028956	325	36719.4	6.61	chrC01:1089927:1091225
BolMYB-CC02	Bol019651	360	39569.6	6.02	chrC01:5714651:5716418
BolMYB-CC03	Bol028684	292	31715.8	6.24	chrC01:25708605:25711294
BolMYB-CC04	Bol015777	438	48901.4	5.6	chrC01:35641652:35643515
BolMYB-CC05	Bol007343	234	26950.4	6.9	chrC01:35844560:35845816
BolMYB-CC06	Bol024521	376	42358	6.59	chrC02:2089430:2091854
BolMYB-CC07	Bol028560	334	37761.7	7.13	chrC02:13693262:13694781
BolMYB-CC08	Bol014863	284	30758.3	5.95	chrC02:33866098:33867431
BolMYB-CC09	Bol008889	372	42126	7.22	chrC03:1197687:1204620
BolMYB-CC10	Bol035504	413	46063.4	5.5	chrC03:20969695:20971425
BolMYB-CC11	Bol042420	294	32211.2	6.2	chrC03:25490630:25492424
BolMYB-CC12	Bol010273	231	26542	7.23	chrC05:30031568:30032758
BolMYB-CC13	Bol038538	355	39541.4	8.4	chrC06:259571:261179
BolMYB-CC14	Bol023916	332	37730.6	7.15	chrC06:7326943:7328444
BolMYB-CC15	Bol038994	401	45776.7	6.26	chrC06:19864580:19870499
BolMYB-CC16	Bol021510	343	38387.3	8.76	chrC06:30795601:30797168
BolMYB-CC17	Bol039981	244	26326.3	5.34	chrC06:33155803:33158322
BolMYB-CC18	Bol017352	316	36220.8	5.75	chrC06:35332877:35334365
BolMYB-CC19	Bol005599	280	31266.1	8.25	chrC07:24132158:24133690
BolMYB-CC20	Bol007939	287	31142.5	5.6	chrC07:29520125:29521505
BolMYB-CC21	Bol033543	423	47007.1	6.29	chrC07:44858472:44860214
BolMYB-CC22	Bol033755	523	58648.1	5.93	chrC07:46246124:46248498
BolMYB-CC23	Bol033442	282	31016.1	7.09	chrC08:6411917:6413403
BolMYB-CC24	Bol021124	398	43940.5	5.8	chrC08:16030197:16031864
BolMYB-CC25	Bol032376	411	45905.7	5.65	chrC09:2998070:2999803
BolMYB-CC26	Bol038739	385	43581	5.91	chrC09:20975838:20979148
BolMYB-CC27	Bol019733	393	44192.3	6	chrC09:31639106:31640927
BolMYB-CC28	Bol043913	335	37665	8.33	chrC09:38395212:38397516
BolMYB-CC29	Bol000495	391	44700.4	8.54	chrCnn
BolMYB-CC30	Bol001212	383	43216.5	6.51	chrCnn
BolMYB-CC31	Bol001320	398	44266.5	5.5	chrCnn
BolMYB-CC32	Bol001380	405	45164.2	5.09	chrCnn
BolMYB-CC33	Bol029749	326	36745.2	5.43	chrCnn
BolMYB-CC34	Bol040508	346	38702.6	7.83	chrCnn
