# Supplementary material for: Genome-wide evolution and expression analysis of the MYB-CC gene family in Brassica spp
Source: PeerJ. 2022 Feb 25;10:e12882. doi: 10.7717/peerj.12882 (PMC8884064; doi:10.7717/peerj.12882)
Supplement: Supplemental Information 3 [file peerj-10-12882-s003.xlsx]

## Sheet: Sheet1
Table S3 The number of MYB-CC genes in every chromosome in B. napus, B. rapa and B.oleracea
	A01	A02	A03	A04	A05	A06	A07	A08	A09	A10	C01	C02	C03	C04	C05	C06	C07	C08	C09
B. napus	5	3	3	0	2	1	6	1	2	2	3	3	2	0	3	4	4	2	4
B. rapa	3	4	3	0	2	3	5	3	2	2
B.oleracea											5	3	3	0	1	6	4	2	4
