# Supplementary material for: Genome-wide evolution and expression analysis of the MYB-CC gene family in Brassica spp
Source: PeerJ. 2022 Feb 25;10:e12882. doi: 10.7717/peerj.12882 (PMC8884064; doi:10.7717/peerj.12882)
Supplement: Supplemental Information 4 [file peerj-10-12882-s004.xlsx]

## Sheet: Sheet1
Table S4 The selected differential genes in B. napus, B. rapa and B. oleracea
Rearranged genes	Genes that were not anchored	Gene loss	No orthologous genes were found in diploid
A01 BraMYB-CC03——BnaMYB-CC01	BraMYB-CC28——BnaMYB-CC05	A02 BraMYB-CC06	A02 BnaMYB-CC09
A05 BraMYB-CC12——BnaMYB-CC20	BraMYB-CC29——BnaMYB-CC04	A05 BraMYB-CC11	A07 BnaMYB-CC31
C03 BolMYB-CC10——BnaMYB-CC18	BraMYB-CC30——BnaMYB-CC21	A06 BraMYB-CC14	C02 BnaMYB-CC14
C06 BolMYB-CC16——BnaMYB-CC26	BraMYB-CC04——BnaMYB-CC51	A07 BraMYB-CC18	C07 BnaMYB-CC37
C06 BolMYB-CC14——BnaMYB-CC28	BraMYB-CC15——BnaMYB-CC52	A08 BraMYB-CC21
C06 BolMYB-CC13——BnaMYB-CC29	BolMYB-CC29——BnaMYB-CC54	C01 BolMYB-CC01
C09 BolMYB-CC27——BnaMYB-CC46	BolMYB-CC30——BnaMYB-CC24	C01 BolMYB-CC05
	BolMYB-CC31——BnaMYB-CC23	C02 BolMYB-CC08
	BolMYB-CC33——BnaMYB-CC47	C08 BolMYB-CC17
	BolMYB-CC09——BnaMYB-CC53	C07 BolMYB-CC20
	BolMYB-CC15——BnaMYB-CC55	C07 BolMYB-CC22
		BolMYB-CC32
		BolMYB-CC34
