# Supplementary material for: Genome-wide evolution and expression analysis of the MYB-CC gene family in Brassica spp
Source: PeerJ. 2022 Feb 25;10:e12882. doi: 10.7717/peerj.12882 (PMC8884064; doi:10.7717/peerj.12882)
Supplement: Supplemental Information 5 [file peerj-10-12882-s005.xlsx]

## Sheet: Sheet1
Table S6 Cis-elements in the promoters of MYB-CC genes
Gene name	element/motif	motif sequence	location	response to stress or hormone
BnaA01g08300D	TGACG-motif	TGACG	1638	MeJA-responsive
BnaA01g08300D	ABRE	ACGTG	1471	abscisic acid responsive
BnaA01g08300D	ABRE	CGCACGTGTC	1708	abscisic acid responsive
BnaA01g08300D	ABRE	ACGTG	1710	abscisic acid responsive
BnaA01g08300D	ABRE	ACGTG	1795	abscisic acid responsive
BnaA01g08300D	TGA-element	AACGAC	1538	auxin-responsive
BnaA01g08300D	CGTCA-motif	CGTCA	1638	MeJA-responsive
BnaA01g08300D	P-box	CCTTTTG	1553	gibberellin-responsive
BnaA01g08300D	GARE-motif	TCTGTTG	516	gibberellin-responsive
BnaA01g08300D	GARE-motif	TCTGTTG	685	gibberellin-responsive
BnaA01g08300D	GARE-motif	TCTGTTG	1058	gibberellin-responsive
BnaA01g08300D	GARE-motif	TCTGTTG	1339	gibberellin-responsive
BnaA01g08300D	TC-rich repeats	GTTTTCTTAC	354	defense and stress responsive
BnaA01g23340D	TC-rich repeats	ATTCTCTAAC	1231	defense and stress responsive
BnaA01g23340D	GARE-motif	TCTGTTG	465	gibberellin-responsive
BnaA01g23340D	LTR	CCGAAA	1361	low-temperature responsive
BnaA01g23340D	CGTCA-motif	CGTCA	1875	MeJA-responsive
BnaA01g23340D	ABRE	GACACGTGGC	455	abscisic acid responsive
BnaA01g23340D	ABRE	CACGTG	457	abscisic acid responsive
BnaA01g23340D	ABRE	ACGTG	458	abscisic acid responsive
BnaA01g23340D	ABRE	AACCCGG	1894	abscisic acid responsive
BnaA01g23340D	TGACG-motif	TGACG	1875	MeJA-responsive
BnaA01g30110D	CGTCA-motif	CGTCA	828	MeJA-responsive
BnaA01g30110D	TGACG-motif	TGACG	828	MeJA-responsive
BnaA01g30110D	ABRE	CACGTG	990	abscisic acid responsive
BnaA01g30110D	ABRE	ACGTG	991	abscisic acid responsive
BnaA01g30110D	ABRE	ACGTG	1038	abscisic acid responsive
BnaA01g30110D	ABRE	CACGTG	1048	abscisic acid responsive
BnaA01g30110D	ABRE	ACGTG	1049	abscisic acid responsive
BnaA01g30110D	P-box	CCTTTTG	160	gibberellin-responsive
BnaA01g30110D	P-box	CCTTTTG	1891	gibberellin-responsive
BnaA01g30110D	LTR	CCGAAA	1510	low-temperature responsive
BnaA01g30110D	TC-rich repeats	GTTTTCTTAC	1972	defense and stress responsive
BnaA01g30110D	TCA-element	TCAGAAGAGG	1251	salicylic acid responsive
BnaA01g30110D	GARE-motif	TCTGTTG	632	gibberellin-responsive
BnaA01g30110D	GARE-motif	TCTGTTG	1352	gibberellin-responsive
BnaA01g30340D	TCA-element	CCATCTTTTT	617	salicylic acid responsive
BnaA01g30340D	P-box	CCTTTTG	664	gibberellin-responsive
BnaA01g30340D	TGACG-motif	TGACG	1688	MeJA-responsive
BnaA01g30340D	LTR	CCGAAA	859	low-temperature responsive
BnaA01g30340D	CGTCA-motif	CGTCA	1688	MeJA-responsive
BnaA01g37390D	LTR	CCGAAA	1400	low-temperature responsive
BnaA01g37390D	TC-rich repeats	ATTCTCTAAC	1724	defense and stress responsive
BnaA02g14410D	GARE-motif	TCTGTTG	1780	gibberellin-responsive
BnaA02g14410D	TGA-element	AACGAC	1635	auxin-responsive
BnaA02g14410D	ABRE	CGTACGTGCA	1519	abscisic acid responsive
BnaA02g30980D	TC-rich repeats	GTTTTCTTAC	720	defense and stress responsive
BnaA02g30980D	P-box	CCTTTTG	120	gibberellin-responsive
BnaA02g30980D	P-box	CCTTTTG	654	gibberellin-responsive
BnaA02g30980D	P-box	CCTTTTG	1408	gibberellin-responsive
BnaA02g30980D	GARE-motif	TCTGTTG	1054	gibberellin-responsive
BnaA02g30980D	ABRE	ACGTG	960	abscisic acid responsive
BnaA02g30980D	TGACG-motif	TGACG	958	MeJA-responsive
BnaA02g30980D	TGACG-motif	TGACG	1246	MeJA-responsive
BnaA02g30980D	CGTCA-motif	CGTCA	958	MeJA-responsive
BnaA02g30980D	CGTCA-motif	CGTCA	1246	MeJA-responsive
BnaA02g30980D	LTR	CCGAAA	43	low-temperature responsive
BnaA02g36130D	CGTCA-motif	CGTCA	1822	MeJA-responsive
BnaA02g36130D	ABRE	ACGTG	681	abscisic acid responsive
BnaA02g36130D	ABRE	GACACGTACGT	682	abscisic acid responsive
BnaA02g36130D	TGACG-motif	TGACG	1822	MeJA-responsive
BnaA02g36130D	AuxRR-core	GGTCCAT	852	auxin-responsive
BnaA02g36130D	TC-rich repeats	GTTTTCTTAC	833	defense and stress responsive
BnaA02g36130D	TC-rich repeats	ATTCTCTAAC	1852	defense and stress responsive
BnaA03g32590D	P-box	CCTTTTG	106	gibberellin-responsive
BnaA03g32590D	TC-rich repeats	GTTTTCTTAC	1991	defense and stress responsive
BnaA03g32590D	ABRE	ACGTG	996	abscisic acid responsive
BnaA03g32590D	ABRE	ACGTG	1028	abscisic acid responsive
BnaA03g32590D	ABRE	CACGTG	1038	abscisic acid responsive
BnaA03g32590D	ABRE	ACGTG	1039	abscisic acid responsive
BnaA03g32590D	TGACG-motif	TGACG	175	MeJA-responsive
BnaA03g32590D	TGACG-motif	TGACG	918	MeJA-responsive
BnaA03g32590D	TGACG-motif	TGACG	921	MeJA-responsive
BnaA03g32590D	LTR	CCGAAA	1543	low-temperature responsive
BnaA03g32590D	CGTCA-motif	CGTCA	175	MeJA-responsive
BnaA03g32590D	CGTCA-motif	CGTCA	918	MeJA-responsive
BnaA03g32590D	CGTCA-motif	CGTCA	921	MeJA-responsive
BnaA03g37160D	TGACG-motif	TGACG	86	MeJA-responsive
BnaA03g37160D	ABRE	ACGTG	84	abscisic acid responsive
BnaA03g37160D	ABRE	ACGTG	1808	abscisic acid responsive
BnaA03g37160D	ABRE	CGTACGTGCA	1837	abscisic acid responsive
BnaA03g37160D	ABRE	AACCCGG	1881	abscisic acid responsive
BnaA03g37160D	CGTCA-motif	CGTCA	86	MeJA-responsive
BnaA03g37160D	TC-rich repeats	GTTTTCTTAC	123	defense and stress responsive
BnaA03g55680D	TATC-box	TATCCCA	164	gibberellin-responsive
BnaA03g55680D	P-box	CCTTTTG	1149	gibberellin-responsive
BnaA03g55680D	CGTCA-motif	CGTCA	520	MeJA-responsive
BnaA03g55680D	ABRE	ACGTG	1549	abscisic acid responsive
BnaA03g55680D	ABRE	CGTACGTGCA	1934	abscisic acid responsive
BnaA03g55680D	ABRE	ACGTG	1937	abscisic acid responsive
BnaA03g55680D	ABRE	AACCCGG	1976	abscisic acid responsive
BnaA03g55680D	TGACG-motif	TGACG	520	MeJA-responsive
BnaA05g33010D	P-box	CCTTTTG	1026	gibberellin-responsive
BnaA05g33010D	P-box	CCTTTTG	1167	gibberellin-responsive
BnaA05g33010D	AuxRR-core	GGTCCAT	424	auxin-responsive
BnaA05g33010D	TGACG-motif	TGACG	369	MeJA-responsive
BnaA05g33010D	TGACG-motif	TGACG	1306	MeJA-responsive
BnaA05g33010D	ABRE	ACGTG	1308	abscisic acid responsive
BnaA05g33010D	LTR	CCGAAA	792	low-temperature responsive
BnaA05g33010D	LTR	CCGAAA	1877	low-temperature responsive
BnaA05g33010D	CGTCA-motif	CGTCA	369	MeJA-responsive
BnaA05g33010D	CGTCA-motif	CGTCA	1306	MeJA-responsive
BnaA05g37380D	LTR	CCGAAA	82	low-temperature responsive
BnaA05g37380D	LTR	CCGAAA	113	low-temperature responsive
BnaA05g37380D	LTR	CCGAAA	141	low-temperature responsive
BnaA05g37380D	LTR	CCGAAA	514	low-temperature responsive
BnaA05g37380D	LTR	CCGAAA	602	low-temperature responsive
BnaA05g37380D	LTR	CCGAAA	727	low-temperature responsive
BnaA05g37380D	LTR	CCGAAA	756	low-temperature responsive
BnaA05g37380D	ABRE	ACGTG	168	abscisic acid responsive
BnaA05g37380D	ABRE	AACCCGG	613	abscisic acid responsive
BnaA05g37380D	TC-rich repeats	ATTCTCTAAC	480	defense and stress responsive
BnaA05g37380D	TC-rich repeats	ATTCTCTAAC	1515	defense and stress responsive
BnaA06g00030D	TCA-element	CCATCTTTTT	954	salicylic acid responsive
BnaA06g00030D	TCA-element	CCATCTTTTT	1709	salicylic acid responsive
BnaA06g00030D	P-box	CCTTTTG	1049	gibberellin-responsive
BnaA06g00030D	CGTCA-motif	CGTCA	972	MeJA-responsive
BnaA06g00030D	CGTCA-motif	CGTCA	1600	MeJA-responsive
BnaA06g00030D	TGA-element	AACGAC	1884	auxin-responsive
BnaA06g00030D	TGACG-motif	TGACG	972	MeJA-responsive
BnaA06g00030D	TGACG-motif	TGACG	1600	MeJA-responsive
BnaA07g00280D	TCA-element	CCATCTTTTT	1897	salicylic acid responsive
BnaA07g00280D	TC-rich repeats	ATTCTCTAAC	1339	defense and stress responsive
BnaA07g00280D	TGA-element	AACGAC	547	auxin-responsive
BnaA07g05970D	TGACG-motif	TGACG	1406	MeJA-responsive
BnaA07g05970D	CGTCA-motif	CGTCA	1406	MeJA-responsive
BnaA07g05970D	TC-rich repeats	ATTCTCTAAC	765	defense and stress responsive
BnaA07g05970D	TC-rich repeats	ATTCTCTAAC	1115	defense and stress responsive
BnaA07g20350D	CGTCA-motif	CGTCA	1890	MeJA-responsive
BnaA07g20350D	TGACG-motif	TGACG	1890	MeJA-responsive
BnaA07g20350D	TCA-element	CCATCTTTTT	372	salicylic acid responsive
BnaA07g24220D	LTR	CCGAAA	771	low-temperature responsive
BnaA07g24220D	CGTCA-motif	CGTCA	751	MeJA-responsive
BnaA07g24220D	TGACG-motif	TGACG	751	MeJA-responsive
BnaA07g24220D	ABRE	ACGTG	324	abscisic acid responsive
BnaA07g24220D	ABRE	CGTACGTGCA	1492	abscisic acid responsive
BnaA07g24220D	TGA-element	AACGAC	1910	auxin-responsive
BnaA07g24220D	TCA-element	CCATCTTTTT	1083	salicylic acid responsive
BnaA07g28130D	GARE-motif	TCTGTTG	528	gibberellin-responsive
BnaA07g28130D	GARE-motif	TCTGTTG	1788	gibberellin-responsive
BnaA07g28130D	P-box	CCTTTTG	1640	gibberellin-responsive
BnaA07g28130D	TCA-element	CCATCTTTTT	1019	salicylic acid responsive
BnaA07g28130D	TGACG-motif	TGACG	504	MeJA-responsive
BnaA07g28130D	TGA-element	AACGAC	1965	auxin-responsive
BnaA07g28130D	CGTCA-motif	CGTCA	504	MeJA-responsive
BnaA07g34920D	CGTCA-motif	CGTCA	80	MeJA-responsive
BnaA07g34920D	CGTCA-motif	CGTCA	1889	MeJA-responsive
BnaA07g34920D	TGACG-motif	TGACG	80	MeJA-responsive
BnaA07g34920D	TGACG-motif	TGACG	1889	MeJA-responsive
BnaA07g34920D	ABRE	ACGTG	792	abscisic acid responsive
BnaA07g34920D	ABRE	TACGGTC	883	abscisic acid responsive
BnaA07g34920D	ABRE	ACGTG	1281	abscisic acid responsive
BnaA07g34920D	TCA-element	TCAGAAGAGG	212	salicylic acid responsive
BnaA07g34920D	TC-rich repeats	ATTCTCTAAC	1919	defense and stress responsive
BnaA08g13620D	GARE-motif	TCTGTTG	1110	gibberellin-responsive
BnaA08g13620D	TCA-element	CCATCTTTTT	992	salicylic acid responsive
BnaA08g13620D	TCA-element	CCATCTTTTT	1033	salicylic acid responsive
BnaA08g13620D	ABRE	CGTACGTGCA	1315	abscisic acid responsive
BnaA08g13620D	LTR	CCGAAA	1199	low-temperature responsive
BnaA08g13620D	LTR	CCGAAA	1365	low-temperature responsive
BnaA09g03540D	ABRE	ACGTG	1464	abscisic acid responsive
BnaA09g03540D	TGACG-motif	TGACG	1352	MeJA-responsive
BnaA09g03540D	TGACG-motif	TGACG	1358	MeJA-responsive
BnaA09g03540D	CGTCA-motif	CGTCA	1352	MeJA-responsive
BnaA09g03540D	CGTCA-motif	CGTCA	1358	MeJA-responsive
BnaA09g03540D	GARE-motif	TCTGTTG	1	gibberellin-responsive
BnaA09g03540D	TCA-element	CCATCTTTTT	1818	salicylic acid responsive
BnaA09g03540D	P-box	CCTTTTG	755	gibberellin-responsive
BnaA09g10270D	LTR	CCGAAA	503	low-temperature responsive
BnaA09g10270D	ABRE	ACGTG	1460	abscisic acid responsive
BnaA09g10270D	ABRE	CACGTG	1934	abscisic acid responsive
BnaA09g10270D	ABRE	ACGTG	1935	abscisic acid responsive
BnaA09g10270D	TATC-box	TATCCCA	1529	gibberellin-responsive
BnaA09g10270D	TC-rich repeats	ATTCTCTAAC	42	defense and stress responsive
BnaA09g10270D	TC-rich repeats	GTTTTCTTAC	1581	defense and stress responsive
BnaA09g10270D	GARE-motif	TCTGTTG	1923	gibberellin-responsive
BnaA09g10270D	TCA-element	CCATCTTTTT	1287	salicylic acid responsive
BnaA10g16590D	TC-rich repeats	GTTTTCTTAC	783	defense and stress responsive
BnaA10g16590D	P-box	CCTTTTG	534	gibberellin-responsive
BnaA10g16590D	GARE-motif	TCTGTTG	495	gibberellin-responsive
BnaA10g16590D	ABRE	ACGTG	1109	abscisic acid responsive
BnaA10g16590D	LTR	CCGAAA	328	low-temperature responsive
BnaA10g16590D	LTR	CCGAAA	625	low-temperature responsive
BnaA10g24150D	CGTCA-motif	CGTCA	74	MeJA-responsive
BnaA10g24150D	LTR	CCGAAA	1331	low-temperature responsive
BnaA10g24150D	TGACG-motif	TGACG	74	MeJA-responsive
BnaA10g24150D	ABRE	CGTACGTGCA	1165	abscisic acid responsive
BnaA10g24150D	ABRE	ACGTG	1168	abscisic acid responsive
BnaA10g24150D	ABRE	ACGTG	1934	abscisic acid responsive
BnaA10g24150D	P-box	CCTTTTG	1732	gibberellin-responsive
BnaA10g24150D	TCA-element	CCATCTTTTT	234	salicylic acid responsive
BnaA10g24150D	TC-rich repeats	GTTTTCTTAC	207	defense and stress responsive
BnaAnng01860D	ABRE	CGTACGTGCA	1178	abscisic acid responsive
BnaAnng01860D	ABRE	ACGTG	1181	abscisic acid responsive
BnaAnng01860D	ABRE	ACGTG	1934	abscisic acid responsive
BnaAnng01860D	AuxRE	TGTCTCAATAAG	1023	auxin-responsive
BnaAnng05640D	ABRE	ACGTG	1419	abscisic acid responsive
BnaAnng05640D	TGACG-motif	TGACG	1133	MeJA-responsive
BnaAnng05640D	TGACG-motif	TGACG	1689	MeJA-responsive
BnaAnng05640D	TGACG-motif	TGACG	1699	MeJA-responsive
BnaAnng05640D	CGTCA-motif	CGTCA	1133	MeJA-responsive
BnaAnng05640D	CGTCA-motif	CGTCA	1689	MeJA-responsive
BnaAnng05640D	CGTCA-motif	CGTCA	1699	MeJA-responsive
BnaAnng05640D	LTR	CCGAAA	1492	low-temperature responsive
BnaAnng05640D	LTR	CCGAAA	1536	low-temperature responsive
BnaAnng05640D	TC-rich repeats	GTTTTCTTAC	1290	defense and stress responsive
BnaC01g09850D	CGTCA-motif	CGTCA	1627	MeJA-responsive
BnaC01g09850D	ABRE	CGCACGTGTC	1691	abscisic acid responsive
BnaC01g09850D	ABRE	ACGTG	1693	abscisic acid responsive
BnaC01g09850D	ABRE	ACGTG	1791	abscisic acid responsive
BnaC01g09850D	TGACG-motif	TGACG	1627	MeJA-responsive
BnaC01g09850D	TGA-element	AACGAC	741	auxin-responsive
BnaC01g09850D	GARE-motif	TCTGTTG	503	gibberellin-responsive
BnaC01g09850D	GARE-motif	TCTGTTG	1042	gibberellin-responsive
BnaC01g30360D	TC-rich repeats	GTTTTCTTAC	1534	defense and stress responsive
BnaC01g30360D	TGACG-motif	TGACG	1886	MeJA-responsive
BnaC01g30360D	ABRE	AACCCGG	1905	abscisic acid responsive
BnaC01g30360D	TGA-element	AACGAC	176	auxin-responsive
BnaC01g30360D	LTR	CCGAAA	1017	low-temperature responsive
BnaC01g30360D	CGTCA-motif	CGTCA	1886	MeJA-responsive
BnaC01g38060D	TC-rich repeats	GTTTTCTTAC	1972	defense and stress responsive
BnaC01g38060D	P-box	CCTTTTG	4	gibberellin-responsive
BnaC01g38060D	GARE-motif	TCTGTTG	446	gibberellin-responsive
BnaC01g38060D	GARE-motif	TCTGTTG	477	gibberellin-responsive
BnaC01g38060D	LTR	CCGAAA	313	low-temperature responsive
BnaC01g38060D	CGTCA-motif	CGTCA	1746	MeJA-responsive
BnaC01g38060D	CGTCA-motif	CGTCA	1796	MeJA-responsive
BnaC01g38060D	TGA-element	AACGAC	1690	auxin-responsive
BnaC01g38060D	TGACG-motif	TGACG	1746	MeJA-responsive
BnaC01g38060D	TGACG-motif	TGACG	1796	MeJA-responsive
BnaC01g38060D	ABRE	ACGTG	799	abscisic acid responsive
BnaC01g38060D	ABRE	ACGTG	831	abscisic acid responsive
BnaC01g38060D	ABRE	CGCACGTGTC	839	abscisic acid responsive
BnaC01g38060D	ABRE	CACGTG	841	abscisic acid responsive
BnaC01g38060D	ABRE	ACGTG	842	abscisic acid responsive
BnaC02g01850D	AuxRE	TGTCTCAATAAG	1056	auxin-responsive
BnaC02g01850D	ABRE	ACGTG	1207	abscisic acid responsive
BnaC02g01850D	ABRE	ACGTG	1934	abscisic acid responsive
BnaC02g01850D	TGACG-motif	TGACG	471	MeJA-responsive
BnaC02g01850D	TGACG-motif	TGACG	813	MeJA-responsive
BnaC02g01850D	CGTCA-motif	CGTCA	471	MeJA-responsive
BnaC02g01850D	CGTCA-motif	CGTCA	813	MeJA-responsive
BnaC02g19330D	GARE-motif	TCTGTTG	1781	gibberellin-responsive
BnaC02g19330D	CGTCA-motif	CGTCA	655	MeJA-responsive
BnaC02g19330D	TGACG-motif	TGACG	655	MeJA-responsive
BnaC02g19330D	ABRE	ACGTG	720	abscisic acid responsive
BnaC02g19330D	ABRE	CGTACGTGCA	1521	abscisic acid responsive
BnaC02g39290D	TC-rich repeats	GTTTTCTTAC	490	defense and stress responsive
BnaC02g39290D	TCA-element	CCATCTTTTT	1759	salicylic acid responsive
BnaC02g39290D	P-box	CCTTTTG	312	gibberellin-responsive
BnaC02g39290D	P-box	CCTTTTG	424	gibberellin-responsive
BnaC02g39290D	P-box	CCTTTTG	1134	gibberellin-responsive
BnaC02g39290D	TGACG-motif	TGACG	687	MeJA-responsive
BnaC02g39290D	ABRE	ACGTG	11	abscisic acid responsive
BnaC02g39290D	ABRE	GCAACGTGTC	86	abscisic acid responsive
BnaC02g39290D	ABRE	CACGTG	88	abscisic acid responsive
BnaC02g39290D	ABRE	ACGTG	89	abscisic acid responsive
BnaC02g39290D	ABRE	CACGTG	104	abscisic acid responsive
BnaC02g39290D	ABRE	ACGTG	105	abscisic acid responsive
BnaC02g39290D	ABRE	ACGTG	689	abscisic acid responsive
BnaC02g39290D	CGTCA-motif	CGTCA	687	MeJA-responsive
BnaC03g43430D	TGACG-motif	TGACG	1522	MeJA-responsive
BnaC03g43430D	ABRE	ACGTG	953	abscisic acid responsive
BnaC03g43430D	ABRE	ACGTG	1818	abscisic acid responsive
BnaC03g43430D	ABRE	AACCCGG	1887	abscisic acid responsive
BnaC03g43430D	CGTCA-motif	CGTCA	1522	MeJA-responsive
BnaC03g43430D	TCA-element	CCATCTTTTT	1273	salicylic acid responsive
BnaC03g43430D	TATC-box	TATCCCA	957	gibberellin-responsive
BnaC03g73670D	P-box	CCTTTTG	141	gibberellin-responsive
BnaC03g73670D	TCA-element	TCAGAAGAGG	1117	salicylic acid responsive
BnaC03g73670D	GARE-motif	TCTGTTG	557	gibberellin-responsive
BnaC03g73670D	ABRE	ACGTG	812	abscisic acid responsive
BnaC03g73670D	ABRE	ACGTG	844	abscisic acid responsive
BnaC03g73670D	ABRE	ACGTG	1108	abscisic acid responsive
BnaC03g73670D	ABRE	ACGTG	1174	abscisic acid responsive
BnaC03g73670D	TGACG-motif	TGACG	742	MeJA-responsive
BnaC03g73670D	TGACG-motif	TGACG	745	MeJA-responsive
BnaC03g73670D	CGTCA-motif	CGTCA	742	MeJA-responsive
BnaC03g73670D	CGTCA-motif	CGTCA	745	MeJA-responsive
BnaC03g73670D	LTR	CCGAAA	1598	low-temperature responsive
BnaC05g40460D	TGA-element	AACGAC	398	auxin-responsive
BnaC05g40460D	TGA-element	AACGAC	599	auxin-responsive
BnaC05g40460D	TGA-element	AACGAC	1124	auxin-responsive
BnaC05g40460D	TGACG-motif	TGACG	1238	MeJA-responsive
BnaC05g40460D	TGACG-motif	TGACG	1448	MeJA-responsive
BnaC05g40460D	CGTCA-motif	CGTCA	1238	MeJA-responsive
BnaC05g40460D	CGTCA-motif	CGTCA	1448	MeJA-responsive
BnaC05g40460D	LTR	CCGAAA	1326	low-temperature responsive
BnaC05g40460D	TC-rich repeats	ATTCTCTAAC	93	defense and stress responsive
BnaC05g40460D	TCA-element	CCATCTTTTT	1865	salicylic acid responsive
BnaC05g47270D	P-box	CCTTTTG	1159	gibberellin-responsive
BnaC05g47270D	P-box	CCTTTTG	1296	gibberellin-responsive
BnaC05g47270D	AuxRR-core	GGTCCAT	605	auxin-responsive
BnaC05g47270D	TGACG-motif	TGACG	550	MeJA-responsive
BnaC05g47270D	TGACG-motif	TGACG	1441	MeJA-responsive
BnaC05g47270D	ABRE	ACGTG	1443	abscisic acid responsive
BnaC05g47270D	LTR	CCGAAA	193	low-temperature responsive
BnaC05g47270D	CGTCA-motif	CGTCA	550	MeJA-responsive
BnaC05g47270D	CGTCA-motif	CGTCA	1441	MeJA-responsive
BnaC05g47520D	GARE-motif	TCTGTTG	717	gibberellin-responsive
BnaC05g47520D	TC-rich repeats	ATTCTCTAAC	1516	defense and stress responsive
BnaC05g47520D	TGACG-motif	TGACG	34	MeJA-responsive
BnaC05g47520D	CGTCA-motif	CGTCA	34	MeJA-responsive
BnaC06g19840D	LTR	CCGAAA	1632	low-temperature responsive
BnaC06g19840D	CGTCA-motif	CGTCA	1892	MeJA-responsive
BnaC06g19840D	ABRE	GACACGTGGC	1419	abscisic acid responsive
BnaC06g19840D	TGACG-motif	TGACG	1892	MeJA-responsive
BnaC06g19840D	TCA-element	CCATCTTTTT	1090	salicylic acid responsive
BnaC06g25290D	LTR	CCGAAA	1581	low-temperature responsive
BnaC06g25290D	TGA-element	AACGAC	599	auxin-responsive
BnaC06g25290D	TCA-element	CCATCTTTTT	1643	salicylic acid responsive
BnaC06g25290D	P-box	CCTTTTG	1921	gibberellin-responsive
BnaC06g28050D	CGTCA-motif	CGTCA	488	MeJA-responsive
BnaC06g28050D	LTR	CCGAAA	774	low-temperature responsive
BnaC06g28050D	TGA-element	AACGAC	1965	auxin-responsive
BnaC06g28050D	TGACG-motif	TGACG	488	MeJA-responsive
BnaC06g28050D	P-box	CCTTTTG	1641	gibberellin-responsive
BnaC06g28050D	GARE-motif	TCTGTTG	1788	gibberellin-responsive
BnaC06g28050D	TCA-element	CCATCTTTTT	1086	salicylic acid responsive
BnaC06g39850D	TGACG-motif	TGACG	489	MeJA-responsive
BnaC06g39850D	TGACG-motif	TGACG	614	MeJA-responsive
BnaC06g39850D	TGACG-motif	TGACG	1892	MeJA-responsive
BnaC06g39850D	ABRE	ACGTG	544	abscisic acid responsive
BnaC06g39850D	ABRE	TACGGTC	639	abscisic acid responsive
BnaC06g39850D	ABRE	ACGTG	1028	abscisic acid responsive
BnaC06g39850D	CGTCA-motif	CGTCA	489	MeJA-responsive
BnaC06g39850D	CGTCA-motif	CGTCA	614	MeJA-responsive
BnaC06g39850D	CGTCA-motif	CGTCA	1892	MeJA-responsive
BnaC06g39850D	TC-rich repeats	ATTCTCTAAC	1922	defense and stress responsive
BnaC06g39850D	AuxRR-core	GGTCCAT	642	auxin-responsive
BnaC07g00540D	LTR	CCGAAA	306	low-temperature responsive
BnaC07g00540D	LTR	CCGAAA	1194	low-temperature responsive
BnaC07g00540D	LTR	CCGAAA	1522	low-temperature responsive
BnaC07g00540D	CGTCA-motif	CGTCA	564	MeJA-responsive
BnaC07g00540D	TGA-element	AACGAC	1126	auxin-responsive
BnaC07g00540D	TGACG-motif	TGACG	564	MeJA-responsive
BnaC07g00540D	TC-rich repeats	GTTTTCTTAC	534	defense and stress responsive
BnaC07g00540D	TC-rich repeats	ATTCTCTAAC	1313	defense and stress responsive
BnaC07g00540D	TC-rich repeats	ATTCTCTAAC	1354	defense and stress responsive
BnaC07g00540D	TCA-element	CCATCTTTTT	1462	salicylic acid responsive
BnaC07g18520D	CGTCA-motif	CGTCA	586	MeJA-responsive
BnaC07g18520D	CGTCA-motif	CGTCA	755	MeJA-responsive
BnaC07g18520D	CGTCA-motif	CGTCA	902	MeJA-responsive
BnaC07g18520D	CGTCA-motif	CGTCA	993	MeJA-responsive
BnaC07g18520D	CGTCA-motif	CGTCA	1145	MeJA-responsive
BnaC07g18520D	CGTCA-motif	CGTCA	1691	MeJA-responsive
BnaC07g18520D	CGTCA-motif	CGTCA	1701	MeJA-responsive
BnaC07g18520D	CGTCA-motif	CGTCA	1947	MeJA-responsive
BnaC07g18520D	ABRE	ACGTG	972	abscisic acid responsive
BnaC07g18520D	ABRE	ACGTG	1424	abscisic acid responsive
BnaC07g18520D	TGACG-motif	TGACG	586	MeJA-responsive
BnaC07g18520D	TGACG-motif	TGACG	755	MeJA-responsive
BnaC07g18520D	TGACG-motif	TGACG	902	MeJA-responsive
BnaC07g18520D	TGACG-motif	TGACG	993	MeJA-responsive
BnaC07g18520D	TGACG-motif	TGACG	1145	MeJA-responsive
BnaC07g18520D	TGACG-motif	TGACG	1691	MeJA-responsive
BnaC07g18520D	TGACG-motif	TGACG	1701	MeJA-responsive
BnaC07g18520D	TGACG-motif	TGACG	1947	MeJA-responsive
BnaC07g18520D	TC-rich repeats	ATTCTCTAAC	535	defense and stress responsive
BnaC07g18520D	TC-rich repeats	GTTTTCTTAC	1581	defense and stress responsive
BnaC07g18520D	TCA-element	CCATCTTTTT	1898	salicylic acid responsive
BnaC07g41450D	TCA-element	CCATCTTTTT	506	salicylic acid responsive
BnaC07g41450D	TCA-element	CCATCTTTTT	732	salicylic acid responsive
BnaC07g41450D	TCA-element	CCATCTTTTT	984	salicylic acid responsive
BnaC07g41450D	LTR	CCGAAA	1288	low-temperature responsive
BnaC07g41450D	CGTCA-motif	CGTCA	846	MeJA-responsive
BnaC07g41450D	CGTCA-motif	CGTCA	1412	MeJA-responsive
BnaC07g41450D	ABRE	GACACGTGGC	103	abscisic acid responsive
BnaC07g41450D	ABRE	CACGTG	1267	abscisic acid responsive
BnaC07g41450D	ABRE	ACGTG	1268	abscisic acid responsive
BnaC07g41450D	TGACG-motif	TGACG	846	MeJA-responsive
BnaC07g41450D	TGACG-motif	TGACG	1412	MeJA-responsive
BnaC08g08750D	TGACG-motif	TGACG	1582	MeJA-responsive
BnaC08g08750D	ABRE	GCAACGTGTC	1031	abscisic acid responsive
BnaC08g08750D	ABRE	ACGTG	1497	abscisic acid responsive
BnaC08g08750D	CGTCA-motif	CGTCA	1582	MeJA-responsive
BnaC08g08750D	AuxRR-core	GGTCCAT	1555	auxin-responsive
BnaC08g13160D	TGACG-motif	TGACG	1419	MeJA-responsive
BnaC08g13160D	ABRE	ACGTG	589	abscisic acid responsive
BnaC08g13160D	ABRE	CGTACGTGCA	1341	abscisic acid responsive
BnaC08g13160D	ABRE	ACGTG	1622	abscisic acid responsive
BnaC08g13160D	CGTCA-motif	CGTCA	1419	MeJA-responsive
BnaC08g13160D	LTR	CCGAAA	228	low-temperature responsive
BnaC08g13160D	LTR	CCGAAA	1224	low-temperature responsive
BnaC08g13160D	TCA-element	CCATCTTTTT	946	salicylic acid responsive
BnaC08g13160D	TCA-element	CCATCTTTTT	998	salicylic acid responsive
BnaC08g13160D	TCA-element	CCATCTTTTT	1039	salicylic acid responsive
BnaC09g02840D	ABRE	ACGTG	1463	abscisic acid responsive
BnaC09g02840D	TGACG-motif	TGACG	440	MeJA-responsive
BnaC09g02840D	CGTCA-motif	CGTCA	440	MeJA-responsive
BnaC09g02840D	TATC-box	TATCCCA	594	gibberellin-responsive
BnaC09g02840D	AuxRR-core	GGTCCAT	483	auxin-responsive
BnaC09g10430D	TGACG-motif	TGACG	152	MeJA-responsive
BnaC09g10430D	ABRE	GACACGTGGC	15	abscisic acid responsive
BnaC09g10430D	ABRE	CACGTG	17	abscisic acid responsive
BnaC09g10430D	ABRE	ACGTG	18	abscisic acid responsive
BnaC09g10430D	ABRE	ACGTG	88	abscisic acid responsive
BnaC09g10430D	ABRE	CGCACGTGTC	367	abscisic acid responsive
BnaC09g10430D	ABRE	CACGTG	369	abscisic acid responsive
BnaC09g10430D	ABRE	ACGTG	370	abscisic acid responsive
BnaC09g10430D	CGTCA-motif	CGTCA	152	MeJA-responsive
BnaC09g10430D	LTR	CCGAAA	445	low-temperature responsive
BnaC09g48760D	TCA-element	TCAGAAGAGG	165	salicylic acid responsive
BnaC09g48760D	TCA-element	TCAGAAGAGG	920	salicylic acid responsive
BnaC09g48760D	ABRE	ACGTG	1614	abscisic acid responsive
BnaC09g48760D	ABRE	ACGTG	1983	abscisic acid responsive
BnaC09g54190D	TC-rich repeats	GTTTTCTTAC	805	defense and stress responsive
BnaC09g54190D	ABRE	ACGTG	1135	abscisic acid responsive
BnaC09g54190D	LTR	CCGAAA	354	low-temperature responsive
BnaC09g54190D	LTR	CCGAAA	651	low-temperature responsive
BnaCnng44310D	TCA-element	CCATCTTTTT	1014	salicylic acid responsive
BnaCnng44310D	CGTCA-motif	CGTCA	1120	MeJA-responsive
BnaCnng44310D	TGACG-motif	TGACG	1120	MeJA-responsive
BnaCnng44310D	ABRE	ACGTG	714	abscisic acid responsive
BnaCnng44310D	ABRE	ACGTG	1937	abscisic acid responsive
BnaCnng44310D	ABRE	AACCCGG	1976	abscisic acid responsive
BnaCnng52990D	LTR	CCGAAA	1401	low-temperature responsive
BnaCnng52990D	TC-rich repeats	ATTCTCTAAC	1725	defense and stress responsive
BnaCnng55690D	TC-rich repeats	ATTCTCTAAC	539	defense and stress responsive
BnaCnng55690D	TC-rich repeats	ATTCTCTAAC	892	defense and stress responsive
BnaCnng55690D	TCA-element	CCATCTTTTT	9	salicylic acid responsive
BnaCnng55690D	TCA-element	CCATCTTTTT	1712	salicylic acid responsive
BnaCnng55690D	CGTCA-motif	CGTCA	1419	MeJA-responsive
BnaCnng55690D	TGACG-motif	TGACG	1419	MeJA-responsive
BnaCnng55690D	ABRE	ACGTG	44	abscisic acid responsive
BnaCnng55690D	ABRE	ACGTG	290	abscisic acid responsive
BnaCnng55690D	ABRE	ACGTG	1417	abscisic acid responsive
