# Supplementary material for: Genome-wide evolution and expression analysis of the MYB-CC gene family in Brassica spp
Source: PeerJ. 2022 Feb 25;10:e12882. doi: 10.7717/peerj.12882 (PMC8884064; doi:10.7717/peerj.12882)
Supplement: Supplemental Information 6 [file peerj-10-12882-s006.xlsx]

## Sheet: B. rapa
Table S7 The FPKM values of BraMYB-CC genes in RNA-Seq analysis
Gene Name	Callus	Flower	Leaf	Root	Silique	Stem
BraMYB-CC01	3.40069	19.7631	15.5607	20.5752	8.19766	17.776
BraMYB-CC02	8.32973	8.57966	11.9949	10.2138	11.0258	27.881
BraMYB-CC03	0.138849	5.39005	0.303817	5.06532	0.0782656	1.07115
BraMYB-CC04	0.145865	0.0682219	0.0911911	18.8746	1.39775	0.346238
BraMYB-CC05	0.843773	1.02606	1.26601	13.47	0.665859	3.60514
BraMYB-CC06	4.03041	10.0536	8.0038	24.1971	0.0890919	4.22071
BraMYB-CC07	11.0915	5.85591	0.723193	20.4531	22.8602	5.16866
BraMYB-CC08	0.147038	0.137541	0	2.75081	0	0.0872558
BraMYB-CC09	0.349333	1.062	3.27591	5.88183	4.72585	1.03651
BraMYB-CC10	44.155	22.608	19.5846	29.2164	29.0808	17.542
BraMYB-CC11	0	0.542887	0	0.180962	0	0.344406
BraMYB-CC12	1.11644	9.66008	1.74493	27.109	0	3.89232
BraMYB-CC13	1.20209	0.281112	1.36212	7.35572	0.423492	3.12089
BraMYB-CC14	30.8502	15.6312	9.70257	16.0309	12.8812	17.4025
BraMYB-CC15	0.878304	1.00415	0.549094	2.61686	1.10017	1.85318
BraMYB-CC16	0.550024	0.587998	0.245615	2.10698	0.265744	1.02582
BraMYB-CC17	4.30471	6.93483	2.89055	7.53129	0.269607	2.74374
BraMYB-CC18	0	0.0794162	0.265386	13.871	0.0957118	1.61221
BraMYB-CC19	5.86447	9.73518	7.22937	22.7153	0.0931172	3.4311
BraMYB-CC20	6.4705	10.8082	3.65994	14.4348	0.0868396	3.6569
BraMYB-CC21	15.3117	8.33469	4.1643	9.27871	6.04645	2.66942
BraMYB-CC22	20.5152	32.1127	22.9306	29.4204	17.0927	36.5635
BraMYB-CC23	0.0873331	0	0	0	0.0984551	0
BraMYB-CC24	1.16338	1.55463	1.45464	2.33194	6.93243	7.29828
BraMYB-CC25	1.21279	4.41179	5.68656	8.78153	3.49407	5.11786
BraMYB-CC26	4.88443	14.8165	4.71131	45.2107	0.235992	8.6956
BraMYB-CC27	1.24316	0.136808	0.32002	17.6481	0.659518	0.173581
BraMYB-CC28	6.88482	17.3556	2.91812	21.176	0.394658	12.3261
BraMYB-CC29	8.10213	17.1981	22.5599	15.7794	5.19932	29.5876
BraMYB-CC30	4.31906	10.8377	6.04324	15.8183	4.32809	7.24157

## Sheet: B. oleracea
Gene Name	Bud	Callus	Flower	Leaf	Root	Silique	Stem
BolMYB-CC01	7.09838	16.6913	12.6881	8.23367	11.067	7.86696	4.19644
BolMYB-CC02	8.24603	7.87795	3.45567	15.588	1.24714	8.87132	8.00572
BolMYB-CC03	2.8352	8.3149	5.65617	6.66064	0.6659	7.23671	11.1874
BolMYB-CC04	11.3197	15.3045	20.6195	1.13115	10.781	13.2116	8.7339
BolMYB-CC05	0.129469	0	0	0	0.387706	0.191519	0
BolMYB-CC06	1.52986	18.5076	2.59064	3.0297	8.0718	3.37664	3.57395
BolMYB-CC07	1.45512	3.85739	0.803278	0.889602	0.683204	0.801751	0.8999
BolMYB-CC08	0	0	0.064631	0.0647868	0.195932	0.580719	0.131014
BolMYB-CC09	1.41478	6.87208	3.49382	1.92623	2.11833	5.05768	8.32177
BolMYB-CC10	29.2859	30.7523	16.5074	38.0913	13.2952	35.979	17.9736
BolMYB-CC11	0.105194	0.11569	0	0	0	0.103739	0.10532
BolMYB-CC12	2.67357	6.936	3.38587	0.610925	2.8056	2.56901	3.98084
BolMYB-CC13	5.20345	10.1557	11.7279	2.75762	9.5834	5.2038	11.2265
BolMYB-CC14	0	0.801194	0.0599686	0.661244	0.848388	0.179609	0
BolMYB-CC15	2.83778	6.86586	5.78148	1.40497	1.34551	2.79855	3.05427
BolMYB-CC16	0.397738	1.9675	0.147246	0.344401	0.496452	0.245004	0.149242
BolMYB-CC17	0.307949	0.423344	0.0760485	0.914782	1.76751	0.151846	0.0770793
BolMYB-CC18	0.868502	0.764128	0	3.86992	0.0866934	1.1991	1.91299
BolMYB-CC19	10.7619	16.9614	12.9745	21.9839	10.3195	18.3014	10.8596
BolMYB-CC20	3.48224	3.51303	2.81436	2.27976	2.12569	1.81642	1.32544
BolMYB-CC21	6.81268	2.75039	2.04444	10.2468	0.430404	5.61293	3.97163
BolMYB-CC22	11.0402	18.2631	19.5456	13.6271	11.6003	11.8227	8.02224
BolMYB-CC23	1.77706	6.71	2.04796	0.586541	1.24169	1.28516	3.26184
BolMYB-CC24	0.695477	3.47668	0.374726	1.12689	2.01955	1.37173	0.379805
BolMYB-CC25	0.557473	7.01655	4.16066	0	1.85489	0.855192	0.310078
BolMYB-CC26	0.0726337	0.399405	0	0	0.435015	0	0.654486
BolMYB-CC27	1.80547	1.09551	3.9359	0.0616466	0	0.368381	0.62332
BolMYB-CC28	1.81108	4.22845	5.1791	0.188793	0.126879	2.1621	2.2907
BolMYB-CC29	1.03981	7.73584	3.50433	3.02826	1.95375	2.35247	2.3883
BolMYB-CC30	1.03981	7.73584	3.50433	3.02826	1.95375	2.35247	2.3883
BolMYB-CC31	6.41842	5.90972	5.97155	7.98126	6.48133	7.87532	4.85694
BolMYB-CC32	3.09457	5.25953	4.37684	0.835694	1.19347	2.15013	3.37994
