# Supplementary material for: Genome-wide evolution and expression analysis of the MYB-CC gene family in Brassica spp
Source: PeerJ. 2022 Feb 25;10:e12882. doi: 10.7717/peerj.12882 (PMC8884064; doi:10.7717/peerj.12882)
Supplement: Supplemental Information 7 [file peerj-10-12882-s007.xlsx]

## Sheet: Sheet1
Table S5 Intron information of MYB-CC gene pairs with the closest evolutionary relationships
Phylogenetic group	Gene name	Number of introns	Gene name	Number of introns
Group A	BolMYB-CC13	5	BnaMYB-CC29	5
	BraMYB-CC20	5	BnaMYB-CC35	5
	BolMYB-CC16	5	BnaMYB-CC26	5
	BraMYB-CC17	5	BnaMYB-CC32	5
	BraMYB-CC28	4	BnaMYB-CC05	4
Group B	BolMYB-CC23	5	BnaMYB-CC41	5
	BraMYB-CC02	5	BnaMYB-CC03	5
	BolMYB-CC03	5	BnaMYB-CC07	5
	BolMYB-CC11	5	BnaMYB-CC19	5
	BraMYB-CC10	5	BnaMYB-CC17	5
Group C	BolMYB-CC27	5	BnaMYB-CC46	5
	BraMYB-CC26	5	BnaMYB-CC49	5
	BolMYB-CC29	5	BnaMYB-CC54	6
	BraMYB-CC03	5	BnaMYB-CC01	6
	BraMYB-CC12	5	BnaMYB-CC20	6
Group D	BraMYB-CC15	5	BnaMYB-CC52	5
	BolMYB-CC28	5	BnaMYB-CC48	5
	BraMYB-CC27	6	BnaMYB-CC50	6
	BraMYB-CC04	6	BnaMYB-CC51	6
	BolMYB-CC06	6	BnaMYB-CC12	6
	BraMYB-CC08	6	BnaMYB-CC15	6
	BolMYB-CC09	6	BnaMYB-CC53	6
Group E	BolMYB-CC24	6	BnaMYB-CC42	6
	BraMYB-CC22	6	BnaMYB-CC40	6
	BraMYB-CC01	4	BnaMYB-CC02	6
	BolMYB-CC21	5	BnaMYB-CC39	5
	BolMYB-CC26	8	BnaMYB-CC36	6
	BolMYB-CC33	6	BnaMYB-CC47	6
	BraMYB-CC24	6	BnaMYB-CC44	6
Group F	BraMYB-CC30	6	BnaMYB-CC21	6
	BolMYB-CC31	6	BnaMYB-CC23	6
	BraMYB-CC07	5	BnaMYB-CC11	5
	BolMYB-CC25	5	BnaMYB-CC45	5
	BraMYB-CC25	5	BnaMYB-CC43	5
Group G	BraMYB-CC13	5	BnaMYB-CC25	5
	BolMYB-CC15	8	BnaMYB-CC55	5
	BolMYB-CC10	6	BnaMYB-CC18	6
	BraMYB-CC29	6	BnaMYB-CC04	6
	BolMYB-CC04	6	BnaMYB-CC08	6
Group H	BraMYB-CC18	5	BnaMYB-CC33	5
	BolMYB-CC18	5	BnaMYB-CC27	6
	BolMYB-CC07	5	BnaMYB-CC13	5
	BraMYB-CC05	5	BnaMYB-CC10	5
	BolMYB-CC14	5	BnaMYB-CC28	5
	BraMYB-CC19	5	BnaMYB-CC34	5
