# Supplementary material for: Genome-wide evolution and expression analysis of the MYB-CC gene family in Brassica spp
Source: PeerJ. 2022 Feb 25;10:e12882. doi: 10.7717/peerj.12882 (PMC8884064; doi:10.7717/peerj.12882)
Supplement: Supplemental Information 8 [file peerj-10-12882-s008.xlsx]

## Sheet: B. napus
Table S8 The FPKM values of BnaMYB-CC genes in RNA-Seq analysis
Gene Name	R-HP	R-LP	S-HP	S-LP
BnaMYB-CC01	0.32839	0.830411	0.239178	0.350928
BnaMYB-CC02	3.8925	3.94712	2.31745	1.91967
BnaMYB-CC03	11.9397	11.518	6.36584	11.2338
BnaMYB-CC04	2.8153	2.75994	1.4703	4.30069
BnaMYB-CC05	15.9322	16.599	9.24826	7.71528
BnaMYB-CC06	7.35315	7.41169	5.71826	4.58821
BnaMYB-CC07	6.59699	8.16759	1.98489	3.70743
BnaMYB-CC08	12.7197	12.914	15.2053	14.5503
BnaMYB-CC09	3.14572	4.74588	6.10938	3.85627
BnaMYB-CC10	3.54684	2.86171	0.121437	0.602761
BnaMYB-CC11	2.84955	3.64038	0.699149	1.29547
BnaMYB-CC12	3.75704	2.59709	0	0
BnaMYB-CC13	13.3364	12.0925	2.09231	2.94844
BnaMYB-CC14	3.30487	5.50302	1.77447	3.49656
BnaMYB-CC15	0.603101	0.310327	0.066408	0
BnaMYB-CC16	1.82279	1.59909	0.909419	1.95167
BnaMYB-CC17	10.0814	9.67208	8.49441	11.8218
BnaMYB-CC18	4.461	3.56204	1.47414	4.58342
BnaMYB-CC19	15.1711	15.3126	13.1873	19.1829
BnaMYB-CC20	3.04717	3.44837	5.16113	3.29515
BnaMYB-CC21	3.33454	2.06698	11.6194	9.75705
BnaMYB-CC22	0.574235	0.767869	0.670697	0.910957
BnaMYB-CC23	5.52014	5.34883	14.686	12.0984
BnaMYB-CC24	1.08667	1.57418	2.85601	2.29671
BnaMYB-CC25	1.49698	1.39159	0.494165	0.529228
BnaMYB-CC26	1.01687	1.2588	5.49655	4.48809
BnaMYB-CC27	0.350411	0.253943	0.0833315	0.190013
BnaMYB-CC28	10.5732	11.0659	1.24664	2.10474
BnaMYB-CC29	2.63965	3.42011	3.22676	2.99089
BnaMYB-CC30	0.483655	0.367586	0.566364	0.366361
BnaMYB-CC31	0.793033	0.882498	0.631729	0.722775
BnaMYB-CC32	0.771551	1.83978	4.37599	3.58966
BnaMYB-CC33	1.86705	1.90136	0.516939	0.704898
BnaMYB-CC34	6.66783	6.03237	1.34252	1.4422
BnaMYB-CC35	2.57819	3.63384	3.27342	2.73221
BnaMYB-CC36	0.702801	0.850541	1.53677	1.06764
BnaMYB-CC37	1.2601	1.17666	2.11211	1.21011
BnaMYB-CC38	6.05447	6.15866	0.607958	0.837243
BnaMYB-CC39	2.01404	2.33579	0.835172	1.03293
BnaMYB-CC40	7.6531	7.27332	4.25754	3.69085
BnaMYB-CC41	3.33502	3.68629	1.41452	2.77688
BnaMYB-CC42	7.25037	7.04653	7.09146	5.03717
BnaMYB-CC43	0.245847	0.0380175	0.21092	0.165573
BnaMYB-CC44	0.180562	0.410038	0.515168	0.705753
BnaMYB-CC45	1.43154	0.305648	2.50547	1.87766
BnaMYB-CC46	1.25346	0.730531	1.58395	0.847963
BnaMYB-CC47	1.98738	1.87641	1.01642	1.82462
BnaMYB-CC48	4.31724	2.26559	0.304883	0.114705
BnaMYB-CC49	1.93785	0.991927	1.84789	1.01209
BnaMYB-CC50	5.50084	1.68326	0.254119	0
BnaMYB-CC51	5.55296	4.51995	0.157684	0
BnaMYB-CC52	3.37868	3.83214	0.332288	0.35869
BnaMYB-CC53	1.31565	0.894381	1.33214	0.414569
BnaMYB-CC54	0.547953	0.903068	0.306768	0.511833
BnaMYB-CC55	0.374241	0.381873	0	0

## Sheet: B. rapa
Gene Name	R-HP	R-LP	S-HP	S-LP
BraMYB-CC01	9.94638	9.3813	6.26423	7.21824
BraMYB-CC02	29.8531	26.1399	17.3339	16.318
BraMYB-CC03	1.55952	1.21375	0.416289	0.554266
BraMYB-CC04	12.3048	18.8085	0.0152955	0.199627
BraMYB-CC05	8.95164	9.39805	1.1426	1.21912
BraMYB-CC06	8.27313	8.22463	8.32795	9.25667
BraMYB-CC07	4.6807	5.08321	1.01614	1.74984
BraMYB-CC08	4.35062	10.3437	0.551523	0.641941
BraMYB-CC09	7.41276	4.00059	7.47359	3.83505
BraMYB-CC10	28.5053	25.3993	19.4303	21.586
BraMYB-CC11	0.207866	0.337616	0.172582	0.251939
BraMYB-CC12	7.09649	4.79356	5.53688	3.30911
BraMYB-CC13	3.43087	2.56613	2.49383	1.37597
BraMYB-CC14	33.2283	31.0254	24.8635	23.7744
BraMYB-CC15	18.7314	15.1783	1.36121	0.244744
BraMYB-CC16	2.20757	1.58827	1.30922	0.584993
BraMYB-CC17	3.02326	1.7987	6.46529	5.40391
BraMYB-CC18	2.77657	3.01164	0.2648	0.237164
BraMYB-CC19	36.0494	34.7194	4.99399	6.84372
BraMYB-CC20	8.18435	5.847	5.77268	5.63934
BraMYB-CC21	14.2328	11.949	10.9427	9.21423
BraMYB-CC22	19.6445	18.8042	14.336	12.498
BraMYB-CC23	0.468407	0.450176	0.117653	0.238477
BraMYB-CC24	1.7534	2.10397	1.25939	0.909139
BraMYB-CC25	3.10326	3.74915	6.099	6.54912
BraMYB-CC26	1.41928	1.53542	3.70941	4.79189
BraMYB-CC27	10.3767	8.66753	0.384356	0.125343
BraMYB-CC28	20.3969	17.9405	8.84633	8.98283
BraMYB-CC29	5.61713	5.03284	10.1798	11.8226
BraMYB-CC30	21.52	16.6595	44.9623	35.3013

## Sheet: B. oleracea
Gene Name	Gan-R-HP	Gan-R-LP	Gan-S-HP	Gan-S-LP
BolMYB-CC01	21.2279	25.3647	1.95773	2.70305
BolMYB-CC02	16.2241	20.1102	8.31218	13.2151
BolMYB-CC03	15.5353	10.757	13.3894	14.9651
BolMYB-CC04	9.39772	15.0529	27.6914	45.6731
BolMYB-CC05	25.312	27.8949	3.76901	3.55502
BolMYB-CC06	9.66228	6.33543	0	0.0327155
BolMYB-CC07	5.42169	9.05701	0.908663	0.733155
BolMYB-CC08	16.4803	15.3012	4.92299	6.25051
BolMYB-CC09	0.664246	0.396434	0.258156	0.0621365
BolMYB-CC10	12.4846	22.9036	9.43293	11.504
BolMYB-CC11	42.5124	47.147	33.1556	30.9751
BolMYB-CC12	0.070498	0.162864	0.0568165	0
BolMYB-CC13	7.68615	9.14064	2.24879	1.9492
BolMYB-CC14	29.4607	33.3047	4.00291	3.70859
BolMYB-CC15	9.88945	13.2263	2.32978	7.87614
BolMYB-CC16	4.88474	6.13679	3.25368	2.94556
BolMYB-CC17	16.4803	15.3012	4.92299	6.25051
BolMYB-CC18	2.35858	4.46605	0.152848	0.155948
BolMYB-CC19	2.07808	3.02292	1.08512	0.860772
BolMYB-CC20	4.48046	3.88854	5.23246	8.02245
BolMYB-CC21	14.4625	15.229	6.02109	7.85971
BolMYB-CC22	54.8874	43.1838	7.19341	10.0453
BolMYB-CC23	6.07322	8.84565	4.77199	3.30254
BolMYB-CC24	12.6833	12.6211	9.35658	10.5313
BolMYB-CC25	9.61216	6.15668	5.01089	4.31685
BolMYB-CC26	2.56682	3.51129	2.19742	2.1388
BolMYB-CC27	15.1356	9.21437	4.03419	1.991
BolMYB-CC28	3.58753	2.83704	0.677666	0.163589
BolMYB-CC29	2.09661	3.90746	0.701555	0.57468
BolMYB-CC30	6.52329	11.9542	2.95592	3.13502
BolMYB-CC31	15.6021	14.1171	10.3425	13.276
BolMYB-CC32	11.006	12.6066	4.17398	7.56246
BolMYB-CC33	7.03651	9.0849	5.54893	5.59061
BolMYB-CC34	5.32786	9.83124	3.43574	3.60112
