# Supplementary material for: Genome-wide evolution and expression analysis of the MYB-CC gene family in Brassica spp
Source: PeerJ. 2022 Feb 25;10:e12882. doi: 10.7717/peerj.12882 (PMC8884064; doi:10.7717/peerj.12882)
Supplement: Supplemental Information 9 [file peerj-10-12882-s009.xlsx]

## Sheet: Sheet1
Table S9 The expression comparison of MYB-CC genes with relative position changed/maintained
	Gene name	R-HP	R-LP	FC(fold change)	ΔFC	S-HP	S-LP	FC(fold change)	ΔFC
Genes with relative position maintained	BnaMYB-CC02	3.8925	3.94712	1.01403	0.0708453	2.31745	1.91967	0.828357	-0.323939
	BraMYB-CC01	9.94638	9.3813	0.943187		6.26423	7.21824	1.1523
	BnaMYB-CC03	11.9397	11.518	0.96468	0.0890607	6.36584	11.2338	1.7647	0.823308
	BraMYB-CC02	29.8531	26.1399	0.875619		17.3339	16.318	0.941389
	BnaMYB-CC06	7.35315	7.41169	1.00796	-0.231561	5.71826	4.58821	0.802378	-0.78747
	BolMYB-CC02	16.2241	20.1102	1.23952		8.31218	13.2151	1.58985
	BnaMYB-CC07	6.59699	8.16759	1.23808	0.545657	1.98489	3.70743	1.86782	0.750148
	BolMYB-CC03	15.5353	10.757	0.692422		13.3894	14.9651	1.11768
	BnaMYB-CC08	12.7197	12.914	1.01528	-0.586484	15.2053	14.5503	0.95692	-0.692441
	BolMYB-CC04	9.39772	15.0529	1.60176		27.6914	45.6731	1.64936
	BnaMYB-CC10	3.54684	2.86171	0.806836	-0.243033	0.121437	0.602761	4.96359	3.89661
	BraMYB-CC05	8.95164	9.39805	1.04987		1.1426	1.21912	1.06697
	BnaMYB-CC11	2.84955	3.64038	1.27753	0.191534	0.699149	1.29547	1.85292	0.130873
	BraMYB-CC07	4.6807	5.08321	1.08599		1.01614	1.74984	1.72205
	BnaMYB-CC12	3.75704	2.59709	0.69126	0.035573	0	0		0
	BolMYB-CC06	9.66228	6.33543	0.655687		0	0.0327155
	BnaMYB-CC13	13.3364	12.0925	0.906726	-0.763787	2.09231	2.94844	1.40918	0.602331
	BolMYB-CC07	5.42169	9.05701	1.67051		0.908663	0.733155	0.80685
	BnaMYB-CC15	0.603101	0.310327	0.514553	-1.86298	0.066408	0	0	-1.16394
	BraMYB-CC08	4.35062	10.3437	2.37753		0.551523	0.641941	1.16394
	BnaMYB-CC16	1.82279	1.59909	0.877278	0.33759	0.909419	1.95167	2.14606	1.63292
	BraMYB-CC09	7.41276	4.00059	0.539689		7.47359	3.83505	0.513147
	BnaMYB-CC17	10.0814	9.67208	0.959398	0.0683576	8.49441	11.8218	1.39172	0.280775
	BraMYB-CC10	28.5053	25.3993	0.89104		19.4303	21.586	1.11094
	BnaMYB-CC19	15.1711	15.3126	1.00932	-0.0996971	13.1873	19.1829	1.45465	0.520415
	BolMYB-CC11	42.5124	47.147	1.10902		33.1556	30.9751	0.934235
	BnaMYB-CC22	0.574235	0.767869	1.3372	-0.972989	0.670697	0.910957	1.35823	1.35823
	BolMYB-CC12	0.070498	0.162864	2.31019		0.0568165	0	0
	BnaMYB-CC25	1.49698	1.39159	0.929601	0.181647	0.494165	0.529228	1.07095	0.519204
	BraMYB-CC13	3.43087	2.56613	0.747953		2.49383	1.37597	0.55175
	BnaMYB-CC30	0.483655	0.367586	0.760018	0.040554	0.566364	0.366361	0.646865	0.20004
	BraMYB-CC16	2.20757	1.58827	0.719464		1.30922	0.584993	0.446825
	BnaMYB-CC32	0.771551	1.83978	2.38452	1.78957	4.37599	3.58966	0.820309	-0.0155256
	BraMYB-CC17	3.02326	1.7987	0.594955		6.46529	5.40391	0.835835
	BnaMYB-CC33	1.86705	1.90136	1.01838	-0.0662857	0.516939	0.704898	1.3636	0.467966
	BraMYB-CC18	2.77657	3.01164	1.08466		0.2648	0.237164	0.895634
	BnaMYB-CC34	6.66783	6.03237	0.904699	-0.0584078	1.34252	1.4422	1.07425	-0.29614
	BraMYB-CC19	36.0494	34.7194	0.963106		4.99399	6.84372	1.37039
	BnaMYB-CC35	2.57819	3.63384	1.40946	0.695045	3.27342	2.73221	0.834666	-0.142236
	BraMYB-CC20	8.18435	5.847	0.714413		5.77268	5.63934	0.976902
	BnaMYB-CC38	6.05447	6.15866	1.01721	-0.437463	0.607958	0.837243	1.37714	0.583894
	BolMYB-CC19	2.07808	3.02292	1.45467		1.08512	0.860772	0.793247
	BnaMYB-CC39	2.01404	2.33579	1.15975	0.106755	0.835172	1.03293	1.23679	-0.0685737
	BolMYB-CC21	14.4625	15.229	1.053		6.02109	7.85971	1.30536
	BnaMYB-CC40	7.6531	7.27332	0.950376	-0.00684852	4.25754	3.69085	0.866897	-0.00489453
	BraMYB-CC22	19.6445	18.8042	0.957225		14.336	12.498	0.871792
	BnaMYB-CC41	3.33502	3.68629	1.10533	-0.351174	1.41452	2.77688	1.96313	1.27106
	BolMYB-CC23	6.07322	8.84565	1.4565		4.77199	3.30254	0.692067
	BnaMYB-CC42	7.25037	7.04653	0.971885	-0.0232073	7.09146	5.03717	0.710314	-0.415241
	BolMYB-CC24	12.6833	12.6211	0.995093		9.35658	10.5313	1.12555
	BnaMYB-CC43	0.245847	0.0380175	0.154639	-1.05349	0.21092	0.165573	0.785006	-0.288798
	BraMYB-CC25	3.10326	3.74915	1.20813		6.099	6.54912	1.0738
	BnaMYB-CC44	0.180562	0.410038	2.2709	1.07096	0.515168	0.705753	1.36995	0.648059
	BraMYB-CC24	1.7534	2.10397	1.19994		1.25939	0.909139	0.721888
	BnaMYB-CC45	1.43154	0.305648	0.213511	-0.426998	2.50547	1.87766	0.749426	-0.112068
	BolMYB-CC25	9.61216	6.15668	0.640509		5.01089	4.31685	0.861493
	BnaMYB-CC48	4.31724	2.26559	0.524778	-0.266029	0.304883	0.114705	0.376226	0.134824
	BolMYB-CC28	3.58753	2.83704	0.790807		0.677666	0.163589	0.241402
	BnaMYB-CC49	1.93785	0.991927	0.511869	-0.569963	1.84789	1.01209	0.547703	-0.744116
	BraMYB-CC26	1.41928	1.53542	1.08183		3.70941	4.79189	1.29182
	BnaMYB-CC50	5.50084	1.68326	0.306001	-0.529289	0.254119	0	0	-0.326111
	BraMYB-CC27	10.3767	8.66753	0.83529		0.384356	0.125343	0.326111
Rearranged genes	BnaMYB-CC01	0.32839	0.830411	2.52873	1.75045	0.239178	0.350928	1.46722	0.135775
	BraMYB-CC03	1.55952	1.21375	0.778284		0.416289	0.554266	1.33145
	BnaMYB-CC20	3.04717	3.44837	1.13166	0.456177	5.16113	3.29515	0.638455	0.0408058
	BraMYB-CC12	7.09649	4.79356	0.675483		5.53688	3.30911	0.597649
	BnaMYB-CC18	4.461	3.56204	0.798485	-1.03606	1.47414	4.58342	3.10921	1.88965
	BolMYB-CC10	12.4846	22.9036	1.83454		9.43293	11.504	1.21956
	BnaMYB-CC26	1.01687	1.2588	1.23792	-0.0184005	5.49655	4.48809	0.816528	-0.0887744
	BolMYB-CC16	4.88474	6.13679	1.25632		3.25368	2.94556	0.905303
	BnaMYB-CC28	10.5732	11.0659	1.0466	-0.0838774	1.24664	2.10474	1.68833	0.761855
	BolMYB-CC14	29.4607	33.3047	1.13048		4.00291	3.70859	0.926473
	BnaMYB-CC29	2.63965	3.42011	1.29567	0.106432	3.22676	2.99089	0.926901	0.0601266
	BolMYB-CC13	7.68615	9.14064	1.18924		2.24879	1.9492	0.866775
	BnaMYB-CC46	1.25346	0.730531	0.582811	-0.0259757	1.58395	0.847963	0.535347	0.0418156
	BolMYB-CC27	15.1356	9.21437	0.608787		4.03419	1.991	0.493531
