# Supplementary material for: Genome-wide evolution and expression analysis of the MYB-CC gene family in Brassica spp
Source: PeerJ. 2022 Feb 25;10:e12882. doi: 10.7717/peerj.12882 (PMC8884064; doi:10.7717/peerj.12882)
Supplement: Supplemental Information 10 [file peerj-10-12882-s010.xls]

## Sheet: B. napus
#ID	gene_name	R-HP1_FPKM	R-HP2_FPKM	R-LP1_FPKM	R-LP2_FPKM	S-HP1_FPKM	S-HP2_FPKM	S-LP1_FPKM	S-LP2_FPKM
GSBRNA2T00038564001	BnaA05g31680D	7.02093	8.02596	6.59272	5.68283	4.65221	3.85083	4.13766	3.80755
GSBRNA2T00139028001	BnaA03g20560D	1.47437	1.78378	1.86337	2.11113	4.87219	4.32998	2.10118	2.5687
GSBRNA2T00082679001	BnaC02g42260D	10.7731	10.0986	12.9194	12.3227	3.35679	3.55673	2.40641	2.91184
GSBRNA2T00107583001	BnaC05g34240D	0	0	0	0	0	0	0	0
GSBRNA2T00143413001	BnaA02g01380D	4.70284	4.62486	4.5003	3.77858	4.32714	3.72276	3.91947	3.69806
GSBRNA2T00144193001	BnaA06g28550D	0	0	0	0	0	0	0	0
GSBRNA2T00105747001	BnaC07g08540D	9.63382	10.4372	8.88297	9.97963	26.1344	25.6016	24.4625	23.3924
GSBRNA2T00148678001	BnaA03g10100D	0.856612	0.543861	0.674477	0.886644	0	0	0	0
GSBRNA2T00040269001	BnaA05g18210D	0.18805	0.145175	0.210579	0.105149	4.93997	5.01172	4.3102	4.99977
GSBRNA2T00068892001	BnaC05g13180D	0	0	0	0	0	0	0	0
GSBRNA2T00114273001	BnaA04g09680D	0.218694	0.294008	0	0.048242	0	0	0.029449	0
GSBRNA2T00048954001	BnaA03g46640D	8.5403	5.73874	7.74193	4.5964	3.53942	6.41915	1.44607	1.31787
GSBRNA2T00031812001	BnaC08g44240D	0	0	0	0	0	0	0	0
GSBRNA2T00104772001	BnaA05g25190D	11.248	11.3622	9.67768	9.42608	0.620912	0.674092	4.53698	5.90585
GSBRNA2T00097770001	BnaC03g72500D	0	0	0	0	0	0	0	0
GSBRNA2T00038392001	BnaA09g27700D	1.15013	0.879471	1.27832	1.43287	0.057482	0.032939	0.186926	0.294594
GSBRNA2T00035516001	BnaA09g46400D	8.23911	7.83495	8.7281	8.43815	4.86751	5.57313	5.8493	5.35966
GSBRNA2T00086962001	BnaA02g29290D	0.042823	0.173452	0.549534	0.580285	0.070036	0.068872	0.353716	0.243791
GSBRNA2T00005147001	BnaC09g52740D	9.9341	9.52197	9.55737	9.91913	0.598111	0.615611	0.939365	1.33553
Brassica_napus_newGene_977	--	0	0	0	0	0.159092	0	1.10184	0.596863
GSBRNA2T00143531001	BnaA02g00410D	7.105	6.35761	4.57147	4.65383	1.99363	2.75062	4.00811	5.6601
GSBRNA2T00078195001	BnaA09g42640D	5.22698	3.22251	3.95287	4.06863	1.21368	2.13429	3.18157	2.38773
GSBRNA2T00076304001	BnaC05g48620D	0.106347	0.14965	0.524169	0.256301	0.153455	0.066556	0	0.551604
GSBRNA2T00144348001	BnaA06g29610D	0.086704	0	0.061857	0.127762	0	0.071178	0	0
GSBRNA2T00057925001	BnaA06g10660D	0	0	0	0	0	0.049882	0	0.05428
GSBRNA2T00116098001	BnaC01g16380D	2.14209	1.84559	2.03872	2.56835	1.20438	1.16428	0.90391	0.85827
GSBRNA2T00074863001	BnaCnng59340D	0	0	0	0	0	0	0	0
GSBRNA2T00151651001	BnaA03g25960D	8.65349	8.85157	8.18608	7.75847	6.19458	6.68132	5.34057	4.54479
GSBRNA2T00156260001	BnaA06g04680D	0.081346	0.023772	0.024041	0	9.72948	10.1026	9.32723	7.51709
GSBRNA2T00118290001	BnaC04g18310D	2.27504	1.50317	2.07896	1.6504	0.14891	0.054796	0.270545	0.225636
GSBRNA2T00156486001	BnaA09g23550D	9.84565	10.4447	17.8953	17.2229	1.06595	1.16009	0.225116	0.257882
GSBRNA2T00001811001	BnaA06g34230D	0	0	0	0	0	0	0	0
GSBRNA2T00088867001	BnaC07g49870D	1.34179	0.81961	1.2301	1.36168	0.75731	0.317631	0.455701	0.429812
GSBRNA2T00062787001	BnaC03g71880D	0	0	0	0	0	0	0	0
GSBRNA2T00021233001	BnaA06g02020D	0.497419	0.695627	0.833275	1.11543	1.1936	0.879623	1.83551	1.83616
GSBRNA2T00002412001	BnaC03g30920D	5.66075	6.67877	3.93529	2.28975	18.5836	22.8753	7.89426	7.62742
GSBRNA2T00050958001	BnaCnng48980D	2.6476	2.55258	2.58979	1.95332	0.363958	0.078735	1.5435	0.934764
GSBRNA2T00084017001	BnaA08g06590D	0	0	0	0	0	0	0	0
GSBRNA2T00147339001	BnaC03g54200D	0	0	0	0	0	0	0	0
GSBRNA2T00136362001	BnaA10g25820D	5.43006	6.22867	6.11119	6.08853	12.4854	12.4049	12.078	13.6376
GSBRNA2T00091423001	BnaCnng16650D	6.21371	5.69791	5.3526	5.77727	4.29803	3.75029	2.55405	3.29086
GSBRNA2T00042040001	BnaC09g15610D	2.84384	2.83573	2.8777	3.34115	1.4717	1.51179	0.952956	1.15732
GSBRNA2T00146126001	BnaC09g05150D	35.1003	32.7432	35.1168	32.2561	23.2337	25.0175	18.8997	17.3764
GSBRNA2T00129285001	BnaA09g32070D	33.4183	36.5511	36.5765	36.9216	36.2143	30.4403	12.7535	16.9583
GSBRNA2T00106267001	BnaC05g37880D	0.146749	0.315831	0.048157	0.322649	0	0.055414	0.031243	0.059419
GSBRNA2T00144472001	BnaA06g30640D	31.2657	30.4292	22.7453	22.8645	13.1745	14.5895	10.8049	15.2504
GSBRNA2T00008116001	BnaA04g29380D	0.322407	0.191672	0.399683	0.17786	1.4388	1.18334	1.49762	0.914315
GSBRNA2T00115504001	BnaC06g08520D	0	0	0	0	0	0	0	0
GSBRNA2T00123143001	BnaC01g09660D	0.036706	0	0.103991	0.042056	0	0	0	0
GSBRNA2T00128665001	BnaC07g19460D	0	0	0	0	0	0	0	0
GSBRNA2T00146248001	BnaA07g35850D	2.96717	2.64635	3.41548	2.93825	7.67458	8.00471	5.3013	5.8979
GSBRNA2T00033565001	BnaC06g06000D	0	0	0	0	0	0	0	0
GSBRNA2T00117814001	BnaA09g19220D	0.099268	0.18154	0.184222	0.296786	6.61135	8.07406	13.9212	8.69656
Brassica_napus_newGene_3048	--	1.33522	0.771991	1.0564	0.899743	1.66248	1.23151	1.655	0.861648
GSBRNA2T00019518001	BnaAnng38520D	0	0	0	0	0	0	0	0
GSBRNA2T00078898001	BnaA08g14310D	4.4634	4.778	5.46406	5.74843	0.081104	0.226134	1.29679	1.20743
GSBRNA2T00135568001	BnaA10g19090D	6.44774	7.04258	5.67351	5.67422	4.96431	5.06051	3.34649	4.10129
GSBRNA2T00123599001	BnaCnng02510D	0.11369	0	0.091293	0	0	0.056682	0	0
GSBRNA2T00064373001	BnaC01g44930D	0	0	0	0	0	0.14047	0.031526	0
GSBRNA2T00105712001	BnaC07g08790D	0	0	0	0	0	0	0	0
GSBRNA2T00089986001	BnaC04g15770D	0	0	0.131439	0.04659	0	0	0.139268	0
GSBRNA2T00113037001	BnaC06g28960D	23.2219	30.4279	29.7739	27.3534	27.532	26.2514	73.524	75.3919
GSBRNA2T00099749001	BnaC07g42990D	5.55752	5.34992	5.38837	5.79479	2.65773	2.59853	3.25394	3.45401
GSBRNA2T00087856001	BnaC05g18920D	0.304001	0.208636	0.13483	0.154003	6.47936	6.44189	4.67232	4.87256
GSBRNA2T00110167001	BnaA10g08040D	27.0196	24.841	23.0453	23.2287	14.4347	16.0771	19.352	14.1091
GSBRNA2T00015827001	BnaC03g27640D	2.78108	2.08111	2.81617	3.10575	0.376752	1.2196	2.30452	1.46377
GSBRNA2T00148524001	BnaC04g17790D	0	0	0	0	0	0	0	0
GSBRNA2T00039677001	BnaC04g51800D	1.20731	0.605845	0.852348	1.03301	0.359167	0.575272	1.17685	1.28025
GSBRNA2T00084467001	BnaC05g19330D	0.583756	0.672924	0.502567	0.373202	1.40289	1.77545	1.24536	1.60575
GSBRNA2T00113595001	BnaA03g39810D	0	0	0	0	0	0	0	0
GSBRNA2T00050078001	BnaC03g57600D	1.54922	1.12103	1.7586	1.17015	0.426136	1.3479	1.28658	1.48914
GSBRNA2T00016013001	BnaC09g47330D	74.5381	79.4866	81.1973	82.6289	24.775	22.5568	22.7362	25.4644
GSBRNA2T00123915001	BnaC03g39900D	4.46677	4.14464	4.15727	4.52342	0.923018	1.11768	2.17904	2.13825
GSBRNA2T00008873001	BnaC05g08540D	0	0	0	0	0	0	0	0
GSBRNA2T00018369001	BnaA09g00410D	0.446902	0.771395	0.500213	0.354346	1.14073	1.64641	1.47347	1.38152
GSBRNA2T00140835001	BnaC03g10090D	0	0	0	0	0	0	0	0
GSBRNA2T00060000001	BnaC04g37430D	0	0	0	0	0	0	0	0
GSBRNA2T00080649001	BnaA05g29330D	0.617828	0.500466	0.742305	1.09211	1.37015	1.83564	3.2158	2.74419
GSBRNA2T00123456001	BnaCnng01280D	0	0	0	0	0	0	0	0
GSBRNA2T00091561001	BnaC02g09970D	3.08048	2.92813	2.78985	2.48794	1.46856	1.04351	1.26884	0.942423
GSBRNA2T00076975001	BnaC02g33000D	0	0	0	0	0	0	0	0
GSBRNA2T00032245001	BnaC05g29280D	2.79672	2.72455	1.74087	2.23867	4.07067	3.3882	2.45633	2.0403
GSBRNA2T00094114001	BnaCnng18540D	0.894987	1.08487	1.34926	1.86361	0.810075	0.581949	1.04891	0.738424
GSBRNA2T00000759001	BnaA06g24220D	2.33553	2.50029	2.18017	2.6026	0.641516	0.854987	0.741653	0.742782
GSBRNA2T00116328001	BnaC03g68450D	3.30313	3.93142	1.49935	1.80214	0.249032	0.376507	0.976763	0.905457
GSBRNA2T00010687001	BnaCnng25150D	9.65591	10.2296	9.09569	8.37064	6.48976	6.2148	6.27227	6.78728
GSBRNA2T00043534001	BnaAnng03450D	4.42188	4.58773	5.46711	4.91693	2.27784	2.31049	3.01055	3.75959
GSBRNA2T00154572001	BnaC07g40080D	1.35132	1.35864	0.862485	1.13438	1.23984	0.935727	1.07763	0.869118
GSBRNA2T00038404001	BnaA09g27620D	0	0	0	0	0	0	0	0
GSBRNA2T00128772001	BnaC07g20000D	9.70493	9.7311	8.52398	9.05163	4.21439	4.8063	4.39941	4.17284
GSBRNA2T00141700001	BnaC03g50180D	0	0	0	0	0	0	0	0
GSBRNA2T00051596001	BnaA03g54730D	0	0	0	0	0	0	0	0
GSBRNA2T00120611001	BnaC02g39050D	0.538454	0.527197	0.490531	0.484273	1.89527	2.0717	0.771542	1.03228
GSBRNA2T00148275001	BnaC04g16660D	0.702963	0.984233	0.839241	1.044	11.7612	13.6671	9.57473	7.03934
GSBRNA2T00094300001	BnaA06g39740D	4.68195	4.93365	4.71265	4.74367	0.833409	0.504062	0.80595	0.700592
GSBRNA2T00088171001	BnaCnng63830D	91.9492	88.1808	107.198	94.0258	29.0412	36.4167	55.7015	42.5888
GSBRNA2T00030757001	BnaCnng78330D	0	0	0	0	0	0	0	0
GSBRNA2T00043731001	BnaC05g31560D	14.1871	11.8662	2.85378	4.67421	0.19875	0	2.34589	1.97612
GSBRNA2T00134849001	BnaC09g07290D	1.55746	1.07125	1.45193	1.24178	2.62982	3.62717	3.09548	3.54229
GSBRNA2T00015702001	BnaA09g30800D	12.7243	12.831	12.9012	13.5257	13.0914	11.5204	11.0223	11.0206
GSBRNA2T00044661001	BnaC05g37610D	0.955374	0.541881	0.487943	0.710606	0.186782	0.053848	0.179999	0.039763
GSBRNA2T00142190001	BnaA03g13610D	6.30203	6.6115	6.68981	8.00593	3.64408	3.38566	7.08241	3.54931
GSBRNA2T00074110001	BnaA05g11150D	6.74183	6.54955	5.95991	6.67095	6.78117	6.60884	6.63042	6.64036
GSBRNA2T00124847001	BnaA03g17850D	1.49675	1.46881	2.60988	2.08682	0.025572	0	0.795185	0.782812
GSBRNA2T00071098001	BnaC04g26290D	13.4199	13.3774	17.0774	15.9708	9.26345	9.42593	8.6802	12.0116
GSBRNA2T00009375001	BnaC09g29220D	1.7218	0.622835	1.59518	4.93927	96.4229	75.5065	90.0466	78.3391
GSBRNA2T00085678001	BnaC04g42460D	0	0	0	0	0	0	0	0
GSBRNA2T00061532001	BnaC08g08500D	0	0	0	0	0	0	0	0
GSBRNA2T00069071001	BnaC06g05480D	0.185842	0	0.376392	0	0	0	0	0
GSBRNA2T00054536001	BnaCnng51430D	9.22467	7.55401	6.24527	6.28522	7.5007	7.16642	11.1959	9.46883
GSBRNA2T00129571001	BnaA09g34360D	0	0	0	0	0	0	0	0
GSBRNA2T00097608001	BnaCnng67400D	0.038625	0.139238	0	0	0	0.07775	2.87163	3.63867
GSBRNA2T00061663001	BnaC08g09080D	0.282647	0.23165	0.54563	0.1774	0.37966	0.588332	0.28074	0.346696
GSBRNA2T00061374001	BnaA09g24970D	0	0	0	0	0	0	0	0
GSBRNA2T00091138001	BnaA08g02400D	0.059136	0.050804	0.03378	0.036184	0	0.039296	0.03054	0
GSBRNA2T00108590001	BnaC05g22870D	11.091	13.2779	10.9727	13.564	2.95262	2.50078	3.09264	4.20493
GSBRNA2T00118385001	BnaC02g28540D	0	0	0	0	0	0	0	0
GSBRNA2T00045717001	BnaC05g49690D	0	0	0	0	0.084383	0	0	0.150282
GSBRNA2T00128406001	BnaA07g06570D	67.6223	70.149	76.7143	74.9753	12.2019	14.2741	17.5821	14.1032
GSBRNA2T00152700001	BnaC04g07590D	0	0	0	0	0	0	0	0
GSBRNA2T00032698001	BnaC09g39950D	0.5789	0	0	0.103639	7.66295	9.09978	2.97666	2.23866
GSBRNA2T00073632001	BnaA08g07200D	0.022394	0	0.019002	0	32.0427	31.1714	21.6922	25.5651
GSBRNA2T00094632001	BnaA09g06240D	20.9835	22.7398	18.6505	17.2329	19.8715	18.6864	14.0089	15.0313
GSBRNA2T00036842001	BnaA02g10500D	2.19125	2.09449	2.08399	1.91199	0.872804	1.01928	0.93982	0.891771
GSBRNA2T00103318001	BnaC06g33460D	0	0	0	0	0	0	0	0
GSBRNA2T00078014001	BnaA06g33200D	0.758341	0.732845	1.55681	1.24957	0.645625	0.438938	0.652631	0.935617
GSBRNA2T00032530001	BnaC03g70450D	43.4366	37.3959	38.8727	45.4695	24.6506	30.31	94.1301	54.1522
GSBRNA2T00011843001	BnaC09g53440D	13.6874	15.157	18.6789	17.7578	3.80116	4.55483	3.96627	4.15179
GSBRNA2T00021129001	BnaA06g02880D	4.20543	4.25381	4.22964	4.21204	33.6857	34.1116	57.2229	43.5365
GSBRNA2T00059556001	BnaA05g29560D	0.037526	0.010253	0.011177	0.072984	0.01099	0	0.043349	0.02064
GSBRNA2T00150852001	BnaA08g17060D	103.931	112.952	68.2875	64.523	126.468	100.502	44.7743	63.3666
GSBRNA2T00021744001	BnaA04g05550D	88.0746	80.5364	96.2492	92.7889	23.5263	28.6413	63.355	45.4085
GSBRNA2T00015613001	BnaC03g29680D	13.5359	12.344	14.6282	13.6793	9.45431	8.63869	6.65374	7.14672
GSBRNA2T00079331001	BnaC03g48820D	1.20853	1.53361	1.25888	1.26046	0.190538	0.236207	0.598332	0.780791
GSBRNA2T00000281001	BnaA05g27430D	3.33591	3.09844	3.25448	3.53937	2.80845	3.37682	2.61879	3.88633
GSBRNA2T00143529001	BnaA02g00430D	5.76771	6.5253	7.08018	6.12489	9.76864	9.14019	7.83998	8.25858
GSBRNA2T00065597001	BnaC05g17650D	0	0	0	0	0	0	0	0
GSBRNA2T00063809001	BnaA01g25110D	0	0	0	0	0	0	0	0
GSBRNA2T00134636001	BnaC03g04320D	34.3524	37.0467	40.7239	42.0158	0.42053	0.117116	0.848368	1.14111
GSBRNA2T00051779001	BnaC05g28810D	16.5296	17.9569	11.033	11.9855	8.28478	7.39603	5.21657	4.86603
GSBRNA2T00120177001	BnaC02g40400D	0	0	0	0	0	0	0	0
GSBRNA2T00108447001	BnaC02g35400D	1.58657	0.783516	2.64718	2.4705	0	0	0.294608	0.309543
GSBRNA2T00005028001	BnaC01g22390D	0	0	0	0	0	0	0	0
GSBRNA2T00119694001	BnaAnng01470D	0	0	0	0	0	0	0	0
GSBRNA2T00056377001	BnaA01g14410D	6.95365	7.49332	6.18783	5.68096	3.01439	3.29248	1.07721	1.15032
GSBRNA2T00036185001	BnaCnng39970D	1.52276	2.84829	2.97539	3.13446	0	0.178523	0.463064	0.139303
GSBRNA2T00044340001	BnaA03g49090D	0.080843	0.14349	0	0	0	0	0	0.070828
GSBRNA2T00020803001	BnaA08g20220D	0	0	0	0	0	0	0	0
GSBRNA2T00116719001	BnaA05g04970D	0.050488	0.086505	0.041167	0	0.042211	0.046503	0.827429	0.636777
GSBRNA2T00119221001	BnaC05g16740D	0	0	0	0	0	0	0	0
GSBRNA2T00093293001	BnaA10g12600D	0	0	0	0	0.05753	0.05787	0.044242	0.009507
GSBRNA2T00068533001	BnaA04g11090D	18.0402	18.6502	13.0591	14.9809	14.5584	14.7935	20.3066	16.5791
GSBRNA2T00041409001	BnaA02g09560D	0.046778	0	0	0.039662	0.038252	0.174284	0.040053	0
GSBRNA2T00081955001	BnaCnng61250D	0	0	0	0	0	0	0	0
GSBRNA2T00040234001	BnaA05g18380D	0	0	0	0	0	0	0	0
GSBRNA2T00032385001	BnaCnng03590D	15.3296	18.5257	16.1521	17.1678	63.9653	66.4476	99.2394	94.8446
GSBRNA2T00121031001	BnaA01g05150D	0	0	0	0	0	0	0	0
GSBRNA2T00090612001	BnaA09g29040D	0.117187	0	0.059786	0	0.151671	0.061312	0.12294	0.043829
GSBRNA2T00140145001	BnaC03g04470D	1.30017	1.52702	1.59378	1.65217	0.248444	0.292178	0.176026	0.329431
GSBRNA2T00056312001	BnaA01g13840D	0	0	0	0.047048	0	0.038928	0	0
GSBRNA2T00157648001	BnaC09g23660D	2.82844	3.01194	2.55317	2.76553	1.42874	2.1264	2.92998	1.60726
GSBRNA2T00053821001	BnaCnng07010D	0.053167	0.150202	0.388879	0.131477	0	0	0	0.048962
GSBRNA2T00021628001	BnaC09g18750D	0	0	0	0	0	0	0.030965	0.082949
GSBRNA2T00103152001	BnaC06g32210D	0.128245	0.124524	0.201757	0.117418	0.450847	0.950395	1.9044	1.57281
GSBRNA2T00084868001	BnaA02g22780D	0.264075	0	0.130579	0.216614	0.517697	0.584891	0.313658	0.32008
GSBRNA2T00013181001	BnaC05g26220D	8.00156	7.92722	7.68879	9.28379	2.5432	1.58359	1.47563	1.85726
GSBRNA2T00084444001	BnaC05g19210D	0.262375	0.291118	0.079452	0.097391	0	0	0	0
GSBRNA2T00001023001	BnaC08g11990D	9.92513	10.9841	10.5338	9.21947	9.63867	9.65624	8.86049	9.77237
GSBRNA2T00072812001	BnaA10g30080D	1.42729	1.12775	2.07658	2.16106	0	0	0.160168	0
GSBRNA2T00043539001	BnaAnng03500D	5.61281	4.41206	4.52938	5.18124	86.3545	90.2334	59.6948	50.8825
Brassica_napus_newGene_2960	--	0.854008	1.05957	1.20357	1.19778	0.077928	0.101419	0.099971	0.149953
GSBRNA2T00064364001	BnaUnng02230D	0	0	0	0	0	0	0	0
GSBRNA2T00089855001	BnaA07g08230D	0	0	0	0	0	0	0	0
GSBRNA2T00008977001	BnaC05g09330D	0	0	0	0	0	0	0	0
GSBRNA2T00131412001	BnaA01g09880D	13.2127	14.0767	14.5032	11.3136	13.0615	16.2489	13.5951	13.9694
GSBRNA2T00157135001	BnaC07g38330D	0.188496	1.01441	0.494853	0.234653	0	0	0.170123	0
GSBRNA2T00148770001	BnaA03g09300D	1.24212	1.13705	1.32068	1.21753	0	0	0	0
GSBRNA2T00141963001	BnaA03g15470D	0.905951	0.637597	0.645793	0.729571	0.164495	0.183621	1.11213	0.495044
GSBRNA2T00048393001	BnaA05g17140D	0	0	0	0	0	0	0.044809	0
GSBRNA2T00103985001	BnaC09g46000D	0.057749	0.187124	0.157333	0.338106	0	0	0.098894	0.041112
GSBRNA2T00112705001	BnaC04g31060D	0	0	0	0	0	0	0	0
GSBRNA2T00084643001	BnaC04g47770D	2.80954	2.75175	4.56925	2.92778	0.576427	1.80955	3.00104	1.19098
GSBRNA2T00151614001	BnaA03g25670D	2.36506	2.45257	1.94462	1.75372	3.81991	4.73435	5.83181	5.38445
GSBRNA2T00111561001	BnaA03g31920D	22.189	21.0322	19.4451	19.223	9.18724	10.8797	15.1806	14.5435
GSBRNA2T00157119001	BnaC07g38210D	0.948544	0.656546	0.597176	0.523927	0.098012	0.111703	0.310293	0.225627
GSBRNA2T00099587001	BnaA07g23380D	5.58858	5.73283	5.33048	4.07393	0.500805	0.60064	1.15687	1.29212
GSBRNA2T00126248001	BnaA04g02880D	0	0.074943	0	0	0	0	0	0
GSBRNA2T00130064001	BnaA03g05580D	37.6458	40.2037	92.1703	87.738	6.09043	5.93532	27.701	28.7282
GSBRNA2T00028331001	BnaAnng40960D	0	0.047041	0.028725	0.075608	0	0	0	0
GSBRNA2T00155033001	BnaA03g38400D	0.450291	0.555762	0.988312	0.534139	0.139647	0.107263	0.267396	0.41394
GSBRNA2T00026246001	BnaCnng76940D	0	0	0	0	0	0	0	0
GSBRNA2T00082928001	BnaC06g10030D	0	0	0	0	0	0	0	0
GSBRNA2T00101793001	BnaC05g35960D	13.8078	14.0751	16.6348	19.0243	0	0	0.494423	0.416006
GSBRNA2T00141957001	BnaA03g15530D	0.278046	0.158883	0.269719	0.162731	0.086482	0	0.199311	0
GSBRNA2T00000695001	BnaA06g24600D	53.5717	52.8361	34.3988	35.7222	2.24095	1.72281	0	0.074019
GSBRNA2T00145898001	BnaC09g03380D	2.15802	2.30496	2.31874	1.2338	0.853423	0.68494	2.09756	1.86926
GSBRNA2T00119855001	BnaC03g28900D	0	0	0	0	0	0	0	0
GSBRNA2T00048964001	BnaA03g46730D	0.041715	0	0.18504	0.237705	4.21837	4.29698	6.65881	5.86384
GSBRNA2T00133358001	BnaC09g34100D	0	0.240701	0	0.170223	5.21768	7.91628	10.6318	8.50316
GSBRNA2T00056978001	BnaC03g56580D	10.4135	12.7067	9.55969	9.36562	15.2176	12.9587	19.6088	14.7892
GSBRNA2T00142361001	BnaC05g20850D	1.25303	0.929392	1.50032	0.790194	1.14689	1.29953	1.87648	1.40154
GSBRNA2T00147175001	BnaC06g09810D	0	0	0	0	0	0	0	0
GSBRNA2T00083945001	BnaC04g33210D	66.8529	62.5439	95.5587	89.2006	11.4776	11.8517	35.8685	30.3922
GSBRNA2T00027605001	BnaC07g51140D	9.15739	8.66254	8.90456	8.51519	6.5552	5.96424	7.14609	5.6536
GSBRNA2T00032958001	BnaC05g25360D	0	0.093633	0	0	0	0	0	0
GSBRNA2T00110632001	BnaC03g37390D	10.1113	9.91802	9.30096	8.76739	3.52603	3.78116	3.79575	3.84914
GSBRNA2T00097126001	BnaC02g16990D	0	0	0	0	0	0	0	0
GSBRNA2T00140383001	BnaC03g06300D	4.26419	4.36506	5.01694	4.54005	4.51778	3.8499	3.61226	3.57004
GSBRNA2T00021205001	BnaA06g02240D	7.40471	7.248	7.31277	7.01672	10.2491	10.0125	6.62821	7.50376
GSBRNA2T00122596001	BnaC06g11460D	89.2314	90.7278	81.4998	85.8687	10.6098	11.3895	25.1229	21.1579
GSBRNA2T00073024001	BnaCnng10670D	4.26639	4.34594	3.28751	3.13454	0.120901	0.14318	0	0
GSBRNA2T00153916001	BnaA05g21990D	0	0	0	0	0	0	0	0
GSBRNA2T00153997001	BnaA05g21320D	1.63145	1.85314	2.50782	2.07442	0.705448	0.449099	1.42894	0.625894
GSBRNA2T00039911001	BnaA01g06570D	4.10707	4.18371	2.49673	3.72964	1.00537	0.772218	2.12548	1.40796
GSBRNA2T00139866001	BnaC08g16010D	0.804303	0.553136	0.353418	0.77448	3.34153	2.93338	3.22528	3.2317
GSBRNA2T00118914001	BnaC09g25390D	0	0	0	0	0	0	0	0
Brassica_napus_newGene_5730	--	3.43194	3.08093	2.54503	3.41063	1.76325	1.89035	0.370982	0.685354
GSBRNA2T00097680001	BnaCnng67590D	5.71807	4.46898	4.66902	5.38856	0.044112	0	0.11716	0.010442
GSBRNA2T00104697001	BnaC08g13600D	4.42582	4.20479	6.0964	5.6295	8.89017	9.1374	6.91414	7.8592
GSBRNA2T00019608001	BnaA09g55740D	0.619109	0.373908	0.913009	0.315793	2.6682	2.75597	4.11514	3.37015
GSBRNA2T00071516001	BnaA03g53140D	0	0	0	0	0	0	0	0
GSBRNA2T00001966001	BnaC08g21460D	0	0.02461	0	0	0	0.075289	0.0862	0.136538
GSBRNA2T00049239001	BnaA03g00560D	2.40363	2.96434	2.75436	3.14386	2.61182	1.77267	2.31533	1.99047
GSBRNA2T00038896001	BnaC05g43750D	6.89744	6.97459	5.58364	5.90803	5.45254	4.25384	3.24241	3.42651
GSBRNA2T00031749001	BnaC08g44760D	0.441743	0.587808	0.383199	0.582555	0.15533	0.353858	0.638652	0.954488
GSBRNA2T00030918001	BnaA02g25860D	1.91487	2.33364	1.47962	1.40349	2.89162	2.63033	1.95269	1.70143
GSBRNA2T00153768001	BnaA05g23230D	0	0	0	0	0	0	0	0
GSBRNA2T00142446001	BnaC05g20400D	0.600963	0.627504	0.545935	0.694683	0.102395	0.151783	0.1293	0.074405
GSBRNA2T00103635001	BnaC06g36020D	0.814308	0.827956	0.698872	0.762821	0.268322	0.508688	0.315401	0.306554
GSBRNA2T00051075001	BnaA10g29810D	8.42023	7.10933	8.15339	8.34598	0.429799	0.530366	0.600921	0.636006
GSBRNA2T00007810001	BnaC08g48550D	0.808964	0.485291	0.98562	0.762709	0.197744	0.381538	0.744963	0.179004
GSBRNA2T00039387001	BnaC02g47630D	0	0	0	0	0	0	0	0
GSBRNA2T00059649001	BnaAnng23670D	227.5	231.187	176.413	177.505	85.0111	79.3946	65.0667	82.3932
GSBRNA2T00092215001	BnaAnng10020D	1.61126	1.06492	1.6834	1.52835	0.469808	0.798523	0.538782	0.593095
GSBRNA2T00073399001	BnaA09g15230D	0.378491	0.163162	0.163185	0.069885	0.215543	0.184395	0.120795	0.293997
GSBRNA2T00065022001	BnaC05g07960D	0	0.263256	0.325249	0.13006	0	0	0	0
GSBRNA2T00136435001	BnaA10g26360D	21.0887	20.147	19.7816	21.2454	7.24338	6.5708	9.5319	8.17108
GSBRNA2T00123164001	BnaA04g24360D	2.11331	1.50395	1.71402	1.31336	101.857	112.636	187.09	131.651
GSBRNA2T00005634001	BnaA09g08130D	27.4598	23.0265	25.9191	28.2754	4.03078	5.87582	16.0284	13.5808
GSBRNA2T00032577001	BnaC03g70150D	0	0	0	0	0	0	0	0
GSBRNA2T00075051001	BnaA04g10500D	2.71816	2.45247	3.70203	3.31956	0.903139	0.533756	1.47853	1.82696
GSBRNA2T00107666001	BnaC01g11910D	0.234776	0.056014	0.206499	0.131737	0.047667	0	0	0
GSBRNA2T00138579001	BnaA01g20810D	0.959453	1.19605	1.44619	1.47107	0.975384	1.21844	2.42842	1.955
GSBRNA2T00007236001	BnaC02g43920D	63.6951	59.1138	43.3426	40.2294	0.645526	0.691624	0.252148	0.091188
Brassica_napus_newGene_6023	--	1.72675	1.99872	1.2162	1.61925	0.933526	1.08357	1.83752	1.27859
GSBRNA2T00067749001	BnaC05g10500D	1.72804	2.37969	2.20528	1.93198	15.4002	18.0141	10.8419	11.8768
GSBRNA2T00145343001	BnaC08g00310D	5.98417	4.74678	5.38833	4.95743	5.20928	5.70252	4.46872	5.12279
GSBRNA2T00094556001	BnaA09g20760D	0	0	0	0	0	0	0	0
GSBRNA2T00120721001	BnaC07g01010D	0	0	0	0	0	0	0	0
GSBRNA2T00128393001	BnaA07g06470D	0	0	0	0	0	0	0	0
GSBRNA2T00061042001	BnaC03g59920D	4.85378	3.93088	3.62739	3.49354	7.19305	6.95171	4.57271	4.89838
GSBRNA2T00135978001	BnaA10g22540D	0	0	0	0	0	0	0	0
GSBRNA2T00106021001	BnaC06g17880D	0	0	0	0	0	0	0	0
GSBRNA2T00081404001	BnaC06g06380D	5.96896	5.39555	6.61965	5.91128	8.35797	8.54664	4.86442	5.99773
GSBRNA2T00041851001	BnaC09g18200D	0	0	0	0	0	0	0	0
GSBRNA2T00002757001	BnaC05g02500D	1.43716	1.62402	1.95154	1.41983	1.09242	1.47576	1.04596	1.13648
GSBRNA2T00041166001	BnaA07g36640D	0	0	0	0	0	0	0	0
GSBRNA2T00049373001	BnaA03g01630D	0	0	0	0	0	0	0	0
GSBRNA2T00083989001	BnaA08g19930D	21.8345	20.0754	21.463	19.9087	21.0055	17.3616	12.529	16.0448
GSBRNA2T00057555001	BnaA01g27640D	0	0	0	0	0	0	0	0
GSBRNA2T00122056001	BnaA09g50410D	0.7265	0.605631	0.656586	0.881133	0.610203	0.458781	0.556617	0.764502
GSBRNA2T00095170001	BnaC06g00510D	0	0	0	0	0	0	0	0
GSBRNA2T00125062001	BnaC03g47400D	12.6597	11.1946	4.46111	4.54375	0.131539	0.061607	0.01117	0.013029
GSBRNA2T00089235001	BnaCnng64440D	21.1141	20.5056	17.2889	18.0426	0.464453	0.779421	2.46304	3.55798
GSBRNA2T00070267001	BnaC04g29200D	0.141256	0.18402	0	0.175889	13.2034	12.6173	8.92635	9.86005
GSBRNA2T00059063001	BnaC09g29860D	0	0	0	0	0	0	0	0
GSBRNA2T00020451001	BnaC08g15000D	0	0	0	0	0	0	0	0.071979
GSBRNA2T00094392001	BnaC09g36870D	0	0	0	0	0	0	0	0
GSBRNA2T00154525001	BnaC07g39680D	0	0.094589	0.141775	0.066893	0	0	0.145137	0.116621
GSBRNA2T00091535001	BnaC07g27410D	11.5268	12.8035	11.2266	11.6491	7.51085	6.68272	4.82931	5.70925
GSBRNA2T00017069001	BnaC03g74090D	0	0	0	0	0	0	0	0
GSBRNA2T00000242001	BnaA05g27100D	2.27889	2.60465	2.1354	2.1413	0.504341	0.353922	0.343581	0.511406
GSBRNA2T00091136001	BnaA08g02420D	0	0	0	0	0	0	0	0
GSBRNA2T00087858001	BnaC05g18940D	0	0	0	0	0	0	0	0
GSBRNA2T00151635001	BnaA03g25830D	0	0	0	0	0.243859	0.058704	1.29777	1.22106
GSBRNA2T00139714001	BnaC08g17100D	3.00567	2.61879	2.92308	2.66663	0.396388	0.451843	0.815548	0.872789
GSBRNA2T00046040001	BnaA02g33250D	0.719103	0.718922	0.858693	0.560765	0.549763	0.587187	1.1005	0.711003
GSBRNA2T00151879001	BnaC02g04980D	9.94663	8.97836	8.35562	7.1985	19.7351	22.8431	15.3894	13.433
GSBRNA2T00072553001	BnaA09g38590D	10.2226	10.5622	10.1825	10.496	0	0	0.047888	0
GSBRNA2T00130913001	BnaC01g03260D	5.82919	5.39706	5.41108	4.39802	9.53284	9.0082	6.99632	9.14163
GSBRNA2T00023581001	BnaC09g54530D	0.906467	0.77902	0.566306	0.615066	2.60093	2.57198	0.249733	0.163595
GSBRNA2T00130680001	BnaC01g05170D	9.01515	8.88841	7.14438	8.29199	5.64927	5.17672	2.96405	3.61319
GSBRNA2T00110272001	BnaA10g07410D	0	0	0	0	0	0	0	0
GSBRNA2T00143543001	BnaA02g00290D	0	0	0.448784	0.351782	0	0	0	0
GSBRNA2T00092131001	BnaAnng31390D	0	0	0	0	0	0	0	0
GSBRNA2T00111179001	BnaA04g06990D	5.44525	4.30279	8.89272	9.48178	20.8662	22.7459	21.9478	22.5848
GSBRNA2T00076723001	BnaC08g10790D	0	0	0	0	0	0	0	0
GSBRNA2T00100113001	BnaC07g45970D	0	0	0	0	0	0	0	0
GSBRNA2T00058984001	BnaC01g21440D	0.482094	0.645037	0.318292	0.760972	0.331305	0.378958	0.788427	0.600797
GSBRNA2T00155591001	BnaC08g30130D	9.34255	8.92027	6.83326	6.40683	4.15092	4.19709	4.60164	3.94335
GSBRNA2T00042063001	BnaC09g15720D	0	0	0	0	0.207006	0.251025	0	0
GSBRNA2T00036590001	BnaA02g19180D	2.29062	1.99712	1.8577	2.12382	1.83957	1.98087	0.98865	1.16044
GSBRNA2T00118751001	BnaA07g13910D	0.130671	0.102802	0.381543	0.719731	0	0	0	0.038095
GSBRNA2T00050734001	BnaA07g00470D	6.59502	5.70248	5.10879	3.95443	3.70658	3.63439	3.58425	3.22763
GSBRNA2T00038547001	BnaA05g31540D	0	0	0	0.108434	0	0	0.162066	0
GSBRNA2T00073333001	BnaC03g62210D	0	0	0	0	0	0	0	0
GSBRNA2T00145610001	BnaA09g22440D	0	0	0	0	0	0	0	0
GSBRNA2T00151253001	BnaA03g41690D	1.09082	1.69033	1.71055	1.94387	0.701064	0.819853	1.03386	0.925253
Brassica_napus_newGene_4482	--	0.285261	0.350114	0.198697	0.427693	0	0	0	0
GSBRNA2T00115978001	BnaC09g09920D	1.35981	1.19821	0.787064	0.543697	0.986643	1.06222	1.23123	2.45429
GSBRNA2T00042202001	BnaC01g19170D	4.72966	5.00257	11.327	12.9553	3.19177	2.77828	21.0693	24.5962
GSBRNA2T00125135001	BnaC03g35910D	0	0.012761	0	0	0	0	0	0
GSBRNA2T00089575001	BnaCnng64600D	0.230655	0.103768	0.212937	0.035144	0	0.02857	0	0.030635
GSBRNA2T00122974001	BnaA10g05400D	0	0	0	0	0	0	0	0
GSBRNA2T00026298001	BnaC01g37780D	4.51974	4.1265	3.67517	2.97497	1.97684	2.01613	2.16341	3.07005
GSBRNA2T00001219001	BnaC08g10120D	2.97885	1.98019	2.81755	1.67782	0	0.4232	0.822972	0.529882
GSBRNA2T00146291001	BnaA07g35500D	2.26513	2.90651	2.88494	3.25256	1.50699	1.87189	1.22789	2.15603
GSBRNA2T00063195001	BnaC06g12580D	7.41541	6.5464	8.39105	7.58152	5.70228	7.07664	10.0383	8.17295
GSBRNA2T00007794001	BnaC02g47770D	3.1597	2.7236	3.75439	4.39575	3.57879	3.728	1.89546	2.92319
GSBRNA2T00061034001	BnaC03g59910D	0.535743	0.472627	0.497381	0.663775	0	0	0	0
GSBRNA2T00111167001	BnaA04g07080D	3.12427	2.98367	2.52493	2.83647	1.98515	1.45869	0.711619	1.29729
GSBRNA2T00043643001	BnaA01g18880D	55.6806	55.8139	69.2886	63.5135	67.6653	66.7602	68.3243	66.0449
GSBRNA2T00145940001	BnaC09g03680D	6.87447	7.22256	2.90505	3.64394	0	0.480227	0.860758	0.734439
GSBRNA2T00062509001	BnaC02g31320D	18.4792	16.5136	14.159	13.8522	2.61722	2.8933	4.87143	5.22739
GSBRNA2T00155578001	BnaC08g30250D	0	0	0	0	0	0	0	0
GSBRNA2T00153925001	BnaA05g21930D	4.27864	4.4084	5.03185	6.51334	0.536597	0.511185	0.673043	0.398353
GSBRNA2T00052824001	BnaA10g10840D	38.3956	36.2374	40.147	45.788	4.00528	5.03542	4.73346	4.69052
GSBRNA2T00063664001	BnaA02g35250D	11.2079	8.70138	10.7096	11.1744	22.5109	24.1935	41.1698	38.345
GSBRNA2T00071161001	BnaC09g24120D	0.538337	0.599001	0.808469	1.19469	0.478776	0.299265	0.181687	0.677573
GSBRNA2T00002882001	BnaC09g30620D	3.18797	3.29969	2.56682	2.16205	0	0	0.167193	0.070865
GSBRNA2T00034600001	BnaCnng38780D	252.147	273.786	250.043	262.261	77.5296	77.699	75.9308	84.134
GSBRNA2T00030570001	BnaC06g41580D	0	0	0	0	0	0	0	0
GSBRNA2T00142740001	BnaC07g07450D	0	0	0	0	0	0	0	0
GSBRNA2T00032965001	BnaC05g25370D	20.6204	21.5618	16.9323	21.2103	9.60416	10.6396	12.7598	12.8101
GSBRNA2T00089894001	BnaA07g08510D	0	0	0	0	0	0	0	0
GSBRNA2T00091707001	BnaA02g24300D	0	0	0	0	0	0	0	0
GSBRNA2T00138094001	BnaC01g12230D	18.7307	19.6443	12.0533	6.30257	3.13898	3.40904	4.08231	3.38215
Brassica_napus_newGene_4625	--	4.75554	4.63838	5.22389	4.31344	3.35053	3.55631	4.17455	5.07901
GSBRNA2T00047021001	BnaC04g24390D	0	0	0	0	0	0.0406	0	0
GSBRNA2T00041290001	BnaCnng05510D	107.427	102.895	866.934	849.008	12.5821	13.1805	1043.61	1073.6
GSBRNA2T00064965001	BnaC02g20710D	1.00327	0.817056	0.555839	0.405259	0.293993	0.652297	0	0
GSBRNA2T00052586001	BnaC02g17690D	0.338604	0.430854	0.308993	0	0	0	0	0.199402
GSBRNA2T00027186001	BnaC04g13640D	0.052785	0.0831	0.00282	0.221799	0.04179	0.067973	0.020862	0.053447
GSBRNA2T00148821001	BnaA03g08840D	0.744784	0.98667	1.92891	1.37861	0	0	0.05581	0
GSBRNA2T00109685001	BnaC09g01330D	11.3115	11.3815	10.6891	10.7804	11.776	11.2548	8.19312	7.08331
GSBRNA2T00120501001	BnaA02g31350D	0	0	0	0	0	0	0	0
GSBRNA2T00148030001	BnaC06g39270D	32.2912	34.8358	34.3664	34.3059	10.2356	10.2176	16.0994	12.9273
GSBRNA2T00080672001	BnaA05g29110D	0.164216	0	0.241824	0.319832	3.45212	5.20578	4.44586	3.88192
GSBRNA2T00152228001	BnaC09g26700D	12.8708	14.3797	13.2839	12.5282	16.605	16.1842	9.20354	10.3969
GSBRNA2T00088430001	BnaAnng09440D	6.67265	7.97283	6.30808	7.67593	2.41123	2.649	3.38493	3.13657
GSBRNA2T00130277001	BnaC01g08240D	0	0	0	0	0	0	0	0
GSBRNA2T00122121001	BnaA09g49910D	0	0	0	0	0	0	0	0
GSBRNA2T00003526001	BnaC03g59090D	0	0	0	0	0.273696	0.65959	0.340361	0.183155
GSBRNA2T00005491001	BnaA01g27100D	4.4329	5.22585	4.90559	4.94647	3.80036	4.29744	3.32557	2.87887
GSBRNA2T00041554001	BnaC06g26610D	1.02135	1.18545	1.00217	0.965744	0.200685	0.207106	0.423747	0.392718
GSBRNA2T00063363001	BnaC06g03700D	1.88355	1.70581	2.03571	1.48013	0.468703	0.823183	0.639465	1.47339
GSBRNA2T00099431001	BnaA07g22140D	0	0	0	0	0	0	0	0
GSBRNA2T00058319001	BnaA04g15000D	2.54443	2.15828	1.65902	1.85394	10.2886	10.0408	9.28146	11.7331
GSBRNA2T00141919001	BnaA03g15820D	4.15311	4.70748	3.3001	3.72182	0.652694	0.719402	0.929832	0.816975
GSBRNA2T00092895001	BnaA05g33190D	0.158608	0.256971	0.140654	0.085614	0	0.082075	0.055631	0.106312
GSBRNA2T00057123001	BnaC08g42230D	2.01405	3.04018	2.8532	2.7607	0.794972	1.26391	2.7127	1.6387
GSBRNA2T00126495001	BnaA04g04540D	0	0	0	0	0	0	0	0
GSBRNA2T00131404001	BnaA01g09820D	4.98001	4.96968	4.45009	5.25555	2.20349	1.96405	2.19132	2.56044
GSBRNA2T00122726001	BnaC02g13150D	0	0	0	0	0	0	0	0
GSBRNA2T00071891001	BnaCnng09670D	8.20636	7.70671	8.88996	8.75081	1.65174	1.43058	1.04243	1.25976
GSBRNA2T00053881001	BnaC04g08750D	0	0	0	0	0	0	0	0
GSBRNA2T00111122001	BnaC05g41230D	2.3158	2.41927	2.29364	2.79378	0.521882	0.531788	0.381481	0.558691
GSBRNA2T00086045001	BnaCnng14340D	0	0	0	0	0	0	0	0
GSBRNA2T00100406001	BnaC05g07440D	0.07387	0.059841	0	0	0	0	0	0
GSBRNA2T00105523001	BnaA06g08870D	0.416465	0.776367	0.930859	0.788497	0.59045	0.439534	0.578676	0.505419
GSBRNA2T00006421001	BnaA04g18780D	0.215977	0.259885	0.306076	0.121313	1.24215	1.4289	1.48649	1.77727
GSBRNA2T00138951001	BnaA03g21210D	36.7345	34.9053	35.3198	33.8279	12.3355	14.1976	20.1008	22.9817
GSBRNA2T00068622001	BnaA09g10620D	0.246937	0.366128	0.235762	0.251843	0.030326	0.042126	0.121596	0.112927
GSBRNA2T00006433001	BnaA04g18880D	0	0	0	0	0	0	0	0
GSBRNA2T00014556001	BnaCnng72690D	0	0	0	0	0	0	0	0
GSBRNA2T00009311001	BnaA05g20450D	0.402168	0.351305	0.504485	0.53154	0.012281	0	0.091161	0.196262
GSBRNA2T00087721001	BnaC08g04720D	0	0	0	0	0	0	0	0
GSBRNA2T00044319001	BnaA03g48930D	0	0	0	0	0.016216	0	0	0
GSBRNA2T00075343001	BnaC01g22820D	9.74597	10.2911	8.75116	9.30772	0.580581	0.555673	0.890074	1.51579
GSBRNA2T00100459001	BnaC05g07020D	0.566828	0.576832	0.656024	0.58371	0.195774	0	0.069422	0.080977
GSBRNA2T00129377001	BnaA09g32800D	0.05645	0	0	0	0	0	0	0
GSBRNA2T00009569001	BnaA09g04640D	2.42127	3.06192	2.70581	3.7159	0.62004	0.886485	2.41945	2.13626
GSBRNA2T00134727001	BnaC09g06550D	0.033709	0	0.069883	0	0	0	0	0.024081
GSBRNA2T00116901001	BnaA05g06480D	0.135895	0.033877	0.030047	0	0	0	0	0
GSBRNA2T00102196001	BnaA07g25920D	0	0.035114	0.720578	0.397159	0	0	0.310285	0
GSBRNA2T00071779001	BnaC01g31220D	0	0	0	0	0	0	0	0
GSBRNA2T00084364001	BnaC02g24910D	15.099	14.2411	16.2344	15.9169	8.88945	10.1062	8.05107	8.59866
GSBRNA2T00108874001	BnaC08g26070D	0	0	0	0	0.160108	0.112133	0	0.080364
GSBRNA2T00115608001	BnaC09g19930D	0	0	0	0	0	0	0	0
Brassica_napus_newGene_11325	--	1.07776	0.46495	1.17903	1.16399	10.8515	10.9654	8.41736	9.35888
GSBRNA2T00146612001	BnaA07g32660D	8.6925	8.70792	8.63972	8.65292	8.06707	9.16863	8.42302	7.40188
GSBRNA2T00155449001	BnaC08g31230D	0	0	0	0	0	0	0	0
GSBRNA2T00070373001	BnaC04g28650D	0	0	0	0	0	0	0	0
GSBRNA2T00144274001	BnaA06g29120D	0	0	0	0.230676	0.339277	0.311527	0.319824	0.229697
GSBRNA2T00080929001	BnaC09g50720D	0.035672	0	0.028875	0.081199	0	0.198692	0.120647	0.035628
GSBRNA2T00015018001	BnaCnng28160D	0.153861	0.251246	0.153113	0.144611	0.076888	0	0.843491	0
GSBRNA2T00107654001	BnaC01g11990D	2.23548	1.99796	1.47605	2.26988	1.75475	1.94589	1.39103	1.75836
GSBRNA2T00118161001	BnaC05g25830D	66.3894	66.5824	65.7978	68.7029	17.7338	19.3314	25.3915	23.7286
GSBRNA2T00148681001	BnaA03g10070D	0.418175	0.241836	0.324979	0.22649	2.23088	2.21201	0.355114	0.206876
GSBRNA2T00127585001	BnaC04g38120D	8.235	6.64202	8.22884	7.69367	10.2243	10.5487	3.99899	5.40272
Brassica_napus_newGene_7106	--	0.65416	0	0	0	0	0	0	0
GSBRNA2T00026919001	BnaC05g32670D	3.44365	3.5495	6.60274	5.93541	1.82834	1.71853	4.37918	4.82539
GSBRNA2T00082054001	BnaA05g12610D	0	0	0	0	0	0	0	0
GSBRNA2T00045095001	BnaA04g25000D	12.1987	12.5041	16.731	17.3986	5.12251	4.40445	36.1855	35.3064
GSBRNA2T00137063001	BnaC02g22350D	0	0	0	0	0	0	0	0
GSBRNA2T00066732001	BnaA03g12930D	0	0	0.073846	0	0	0	0.039057	0
GSBRNA2T00116568001	BnaA02g14960D	7.13965	7.18049	5.05373	4.91632	11.6767	11.1061	9.98881	10.3864
GSBRNA2T00066288001	BnaC06g30250D	13.5722	13.8205	21.6586	22.3089	0.608929	0.509149	1.92792	1.18725
GSBRNA2T00142852001	BnaC07g25320D	0	0	0	0	0	0	0	0
GSBRNA2T00053955001	BnaC04g08240D	0	0	0	0	0	0	0	0
GSBRNA2T00017772001	BnaAnng38270D	0	0	0	0	0	0	0	0
GSBRNA2T00024313001	BnaC04g01580D	0	0.08153	1.44651	0.173133	0	1.15237	1.44023	1.42541
GSBRNA2T00126923001	BnaA08g08990D	0	0	0	0	0	0	0	0
GSBRNA2T00114939001	BnaC02g11200D	2.50839	1.87107	1.60159	1.02727	13.398	13.1749	62.2723	72.0862
GSBRNA2T00112706001	BnaC04g31050D	4.89995	4.91394	5.04394	5.1238	3.18814	2.69573	2.48848	3.15086
GSBRNA2T00065409001	BnaC02g06470D	0	0	0	0	0	0	0	0
GSBRNA2T00023891001	BnaA05g17760D	5.7498	6.19974	4.81763	4.52359	0.39044	0.786412	0.949418	0.957667
GSBRNA2T00140495001	BnaC03g07270D	0	0	0	0	0	0	0	0
GSBRNA2T00108424001	BnaC02g35550D	0	0	0	0	0	0	0	0
GSBRNA2T00125292001	BnaC03g34800D	0.353454	0.413845	0.80381	0.743431	0.294637	0.138281	0.108316	0.228025
GSBRNA2T00151258001	BnaA03g41640D	0	0	0	0	0.175373	0.133173	0.811243	0.634974
GSBRNA2T00077975001	BnaC02g23860D	6.83793	6.25523	5.68076	6.57035	4.6374	4.05682	4.68196	4.15585
GSBRNA2T00150720001	BnaA08g18110D	0	0.038504	0	0	0	0	0	0
GSBRNA2T00090692001	BnaA09g29660D	2.33626	1.9854	1.75872	1.99555	17.3504	13.6675	5.12739	5.84166
GSBRNA2T00078521001	BnaC09g38230D	0	0	0	0	0	0	0	0
GSBRNA2T00116475001	BnaA02g15560D	0	0	0	0	0	0	0	0
GSBRNA2T00138331001	BnaC01g13870D	31.9634	26.4095	29.9289	32.6764	5.38127	7.40402	10.1573	9.53765
GSBRNA2T00038414001	BnaUnng00010D	0.556718	0.888105	1.01588	0.693772	0.112591	0	0.140137	0.193066
GSBRNA2T00031708001	BnaC08g45120D	0	0	0	0	0	0	0	0
GSBRNA2T00065431001	BnaA07g02410D	3.79733	3.07762	3.11178	2.61505	0.641486	0.682953	0.824029	0.562546
GSBRNA2T00143519001	BnaA02g00510D	1.78187	1.23587	0.843072	0.640024	0	0	0	0
GSBRNA2T00100284001	BnaC07g47180D	7.28075	0	0	0	0	1.30279	1.82352	0
GSBRNA2T00113184001	BnaC02g27950D	1.40085	1.01869	1.74585	1.54541	0.775467	0.882693	1.48115	1.37727
GSBRNA2T00157034001	BnaC07g37550D	0.445545	0	0.268686	0.145209	0.107367	0	0	0
GSBRNA2T00134862001	BnaC09g07370D	9.74467	10.3587	7.14514	8.72134	6.53804	7.23231	4.10479	5.38594
GSBRNA2T00097283001	BnaC05g47780D	4.52395	5.38347	6.51122	6.52851	5.59532	6.23698	4.09579	4.94803
GSBRNA2T00126877001	BnaA08g09350D	15.4657	15.6823	9.6456	11.023	76.8511	86.0984	72.654	59.5633
GSBRNA2T00016995001	BnaA04g29480D	0.477635	1.11346	1.1233	2.18347	0.237076	0.165134	0.301818	1.11797
Brassica_napus_newGene_11115	--	0	0	0.396628	0	0.251338	0.539382	0.374546	0.496802
GSBRNA2T00082428001	BnaC09g32020D	0	0	0	0	0	0	0	0
GSBRNA2T00140338001	BnaC03g05930D	11.3259	11.4393	9.68928	10.2425	5.80061	5.19078	3.50833	5.23952
GSBRNA2T00018520001	BnaC01g39710D	5.77431	4.54848	4.52529	5.19032	1.06413	0.870838	2.1015	1.41832
GSBRNA2T00041248001	BnaCnng43940D	2.79187	3.189	17.9189	18.1678	0.050396	0.70693	1.64524	0.504226
Brassica_napus_newGene_14000	--	2.83539	1.21945	3.93239	3.40945	5.79744	6.79991	7.3378	8.99971
GSBRNA2T00028439001	BnaAnng40990D	0.082091	0	0.103871	0	0	0	0	0
GSBRNA2T00155428001	BnaC08g31400D	0	0.037336	0	0	0	0	0	0
GSBRNA2T00128773001	BnaC07g20010D	4.65069	4.68901	4.31131	3.59828	25.8746	28.5612	18.6438	15.4743
GSBRNA2T00112529001	BnaC07g35000D	0	0	0	0	0	0	0	0
GSBRNA2T00012206001	BnaC04g36670D	8.88086	10.3527	13.5964	15.197	0	0	0	0
GSBRNA2T00007560001	BnaC01g38580D	0	0	0	0.153186	0.049795	0	0	0
Brassica_napus_newGene_6085	--	0	0.262119	0.507515	0.212092	0.381286	0.413468	0.597734	0.178802
GSBRNA2T00127294001	BnaC08g33810D	2.1353	2.60098	1.61375	2.53714	0	0	0	0.23492
Brassica_napus_newGene_7941	--	1.34619	1.18095	1.3297	1.27232	0.6201	0.831972	0.690149	0.978415
GSBRNA2T00017902001	BnaAnng38320D	1.65822	0.739248	0.575763	0.270353	0.052527	0	0	0
GSBRNA2T00044547001	BnaC01g39930D	0	0	0	0	0	0	0	0
GSBRNA2T00032657001	BnaC09g39610D	0	0	0	0	0	0	0	0
GSBRNA2T00053277001	BnaA10g12480D	0.28317	0.249492	0.195419	0	0	0	0	0.413745
GSBRNA2T00113792001	BnaA09g25810D	4.63447	3.95489	2.48711	2.35903	1.33537	1.66518	1.09993	1.0877
GSBRNA2T00053327001	BnaCnng50240D	0	0.041816	0	0.04112	0	0	0	0
GSBRNA2T00124233001	BnaC05g26850D	0	0	0	0	0	0	0	0
GSBRNA2T00074140001	BnaAnng27140D	3.56588	4.07575	3.73919	5.10521	11.4427	12.1734	6.97859	6.78882
GSBRNA2T00082451001	BnaC09g32150D	0	0	0	0	0	0	0	0
GSBRNA2T00073515001	BnaAnng27030D	0	0.175067	0	0	0	0	0	0
GSBRNA2T00005852001	BnaC08g08740D	0	0	0	0	0	0	0	0
GSBRNA2T00045236001	BnaA04g16160D	3.69248	3.88029	3.33754	3.03543	0.444923	0	1.1605	0.781547
GSBRNA2T00148081001	BnaC06g39680D	6.16098	5.71322	10.7064	10.1255	3.77819	4.40859	3.11255	3.60425
GSBRNA2T00026349001	BnaC01g38150D	11.8642	12.0261	11.8821	12.0209	3.19096	3.24905	3.33245	3.42368
GSBRNA2T00130695001	BnaC01g05040D	0	0	0.055551	0	0	0	0	0
GSBRNA2T00059877001	BnaC03g41440D	0	0	0	0	0	0	0	0
GSBRNA2T00082908001	BnaAnng08000D	3.99617	4.03916	8.65776	7.80834	0.074708	0	0	0.095713
GSBRNA2T00095985001	BnaAnng32400D	18.9602	20.8741	31.4183	27.9236	0	0	0	0
GSBRNA2T00087996001	BnaA10g04130D	4.68607	4.9035	5.4622	5.46796	5.45544	5.54333	6.39545	5.06096
GSBRNA2T00088783001	BnaC06g02560D	0	0	0	0	0	0	0	0
GSBRNA2T00040232001	BnaA05g18400D	0	0	0	0	0	0	0	0
GSBRNA2T00065750001	BnaA02g18390D	0.547231	0.632562	0.790628	0.537364	0.934635	0.74141	0.456113	0.232847
GSBRNA2T00051310001	BnaA03g60420D	0	0	0	0	0	0	0	0
GSBRNA2T00076390001	BnaC03g59070D	1.06395	0.854669	0.894303	0.862356	0.642471	0.797402	0.488319	0.660982
GSBRNA2T00068763001	BnaA09g14920D	5.22343	5.74111	5.39288	5.57906	3.7607	3.51322	2.63853	3.51431
GSBRNA2T00118676001	BnaA07g13340D	70.8053	66.2094	75.8682	82.7603	6.00493	10.1484	13.5716	11.229
GSBRNA2T00060268001	BnaA01g31240D	0	0.010367	0.015262	0	0.056476	0.108156	0.075828	0.068893
GSBRNA2T00119669001	BnaAnng01260D	0.047036	0	0	0	0	0	0	0
GSBRNA2T00052392001	BnaAnng21950D	41.1592	43.7749	48.5644	49.6662	0.592746	0.61777	3.58062	3.98622
GSBRNA2T00060535001	BnaCnng54200D	0	0	0	0	0	0	0	0
GSBRNA2T00016646001	BnaA06g38870D	4.76189	5.6284	4.62338	5.33773	0.38633	0.413244	0.702422	1.18695
GSBRNA2T00060673001	BnaC03g12730D	2.00497	1.51209	2.19676	1.63627	0.035813	0	0.042998	0
GSBRNA2T00012801001	BnaC08g14340D	0	0	0	0	0.483249	0.15813	0.792897	0.698106
GSBRNA2T00145546001	BnaA09g21970D	0.553689	0.839591	0.279454	0.247381	10.7284	10.2838	6.68328	8.13505
GSBRNA2T00047237001	BnaA08g26980D	10.7704	10.7021	10.5755	10.9574	6.56022	6.48908	3.54951	4.87082
GSBRNA2T00103693001	BnaC06g36480D	0	0	0	0	0	0	0	0
GSBRNA2T00043470001	BnaA04g17340D	6.89129	9.51834	7.59455	8.56672	6.69655	6.84852	5.64591	5.31155
GSBRNA2T00083700001	BnaA07g01950D	3.61471	3.65137	5.35011	4.56021	2.34969	2.35862	3.40615	3.2792
GSBRNA2T00074749001	BnaC02g22700D	5.50376	5.71257	5.11417	4.59165	2.2937	2.0749	2.64598	2.72568
GSBRNA2T00061736001	BnaC08g09440D	0.480681	0.518387	1.0708	0.976565	0	0	0	0
GSBRNA2T00112312001	BnaA07g11160D	8.66794	0.810877	8.58449	0.471028	6.00639	0.659133	1.16382	4.77503
GSBRNA2T00051834001	BnaC01g36460D	0	0	0	0	0.120902	0.265111	0.24382	0.319483
GSBRNA2T00025339001	BnaAnng15570D	5.95258	6.96469	5.45932	5.28796	10.9213	10.6858	7.09222	7.07478
Brassica_napus_newGene_997	--	0.204579	0.185029	1.00134	0.613481	0	0	0	0
GSBRNA2T00068781001	BnaA09g15030D	12.4414	14.9564	16.5566	16.9941	25.2794	24.534	24.4874	25.4135
GSBRNA2T00070798001	BnaC07g03070D	8.34978	8.58412	9.49544	8.92965	2.9145	4.00266	4.67592	4.32415
GSBRNA2T00142799001	BnaC07g25020D	5.36297	4.90708	2.47419	2.39722	0.709872	0.195681	0.228259	0.097291
GSBRNA2T00018345001	BnaC09g01040D	1.52642	1.29297	1.34488	1.71888	0.76352	0.691405	0.878091	0.828266
GSBRNA2T00069240001	BnaA10g29680D	27.8256	22.8216	3.81984	3.21321	0.397627	0.414755	0.492915	0.446534
GSBRNA2T00062885001	BnaC04g44380D	3.54385	3.5957	4.76994	4.09327	1.1279	1.00286	2.10291	2.13403
GSBRNA2T00130876001	BnaC01g03580D	0.257901	0.036637	0.295734	0.109406	0	0	0	0
GSBRNA2T00066718001	BnaA03g13030D	16.3926	12.672	11.4153	14.67	4.55327	5.99572	9.5935	6.67962
GSBRNA2T00062389001	BnaA07g04130D	0.512523	0.67909	0.778049	1.06788	0.331049	0.130188	0.375235	0.490711
GSBRNA2T00099442001	BnaA07g22230D	6.48518	8.93623	6.13494	5.29484	3.76532	6.23036	4.46182	4.69111
GSBRNA2T00078402001	BnaC09g39010D	70.3152	62.4368	76.1091	70.3129	0.070036	0	2.29463	3.43232
GSBRNA2T00112080001	BnaA03g27600D	2.79149	2.68176	2.35638	2.23659	1.46078	1.27604	2.6762	2.73894
GSBRNA2T00056116001	BnaA02g28970D	0	0	0	0	0	0	0	0
GSBRNA2T00129045001	BnaC03g53570D	0.770552	0.891324	1.12406	0.975265	0.313047	0.139571	0.198715	0.267605
GSBRNA2T00078194001	BnaA09g42630D	44.2285	39.7713	36.9391	32.8904	72.6104	76.8801	103.814	88.9426
GSBRNA2T00067262001	BnaA01g29490D	31.7368	31.2635	28.5589	27.1714	10.0905	10.3697	11.0035	11.7308
GSBRNA2T00112219001	BnaA03g26500D	4.5438	4.54871	4.95254	4.51624	2.14413	2.52343	2.51166	2.84865
GSBRNA2T00013637001	BnaC08g49940D	15.2009	13.4673	15.1076	14.3509	11.1152	11.3889	9.67416	9.78346
GSBRNA2T00144116001	BnaC03g56030D	0.052809	0.143618	0	0	0	0	0.070062	0
GSBRNA2T00008928001	BnaC05g08950D	0.043347	0.069527	0.065515	0.078709	0.035446	0.107302	0.095421	0.129014
GSBRNA2T00087813001	BnaA01g13600D	0	0	0	0	0	0	0.038357	0
GSBRNA2T00017379001	BnaCnng29240D	1.23003	0.632815	0.625022	0.724158	0.036905	0.172209	0.086926	0.261932
GSBRNA2T00023346001	BnaCnng32860D	0	0.082067	0.205011	0.355965	0.939575	0.42463	2.66651	1.99397
GSBRNA2T00091739001	BnaC02g34040D	4.03977	3.70706	4.98425	4.20254	3.16123	3.12468	1.79232	2.59218
GSBRNA2T00150157001	BnaC03g46480D	0	0	0	0	0	0	0	0.186385
GSBRNA2T00095153001	BnaC06g00400D	0	0	0	0	0	0	0	0
GSBRNA2T00129868001	BnaA03g03870D	0.63731	0.472156	0.298739	0.63927	0	0	0.055561	0
GSBRNA2T00031964001	BnaC05g03930D	0	0	0	0	0	0	0	0
GSBRNA2T00086418001	BnaA02g33050D	0	0	0	0	0	0	0	0
GSBRNA2T00127410001	BnaC08g34770D	13.4517	15.7657	14.535	15.2763	3.99401	3.0227	3.93664	5.9646
GSBRNA2T00070539001	BnaA09g13930D	0	0	0	0	0	0	0	0
Brassica_napus_newGene_2316	--	6.12692	0.993605	2.49369	4.31604	2.65757	3.46709	3.64787	4.69961
GSBRNA2T00086999001	BnaCnng63060D	0.38146	0.179771	0.154175	0.434868	0.184718	0.129732	0.125112	0.34923
GSBRNA2T00085365001	BnaC05g00610D	0	0	0	0	0	0	0	0
GSBRNA2T00115244001	BnaC04g25300D	0	0	0	0	0	0	0	0
GSBRNA2T00014770001	BnaC01g22670D	1.18497	0.680211	0.726907	1.06488	0	0	0	0
GSBRNA2T00146306001	BnaA07g35350D	0.157589	0.3783	0.43031	0.469462	0.054124	0.07168	0.210049	0.217467
Brassica_napus_newGene_10447	--	3.0735	3.0067	2.69252	2.28047	2.0452	2.14376	1.85928	1.87548
GSBRNA2T00146073001	BnaC09g04690D	0	0	0	0	0.273588	0.262052	0.209866	0.584792
GSBRNA2T00084434001	BnaC05g19120D	1.42739	1.49437	1.63521	1.26161	0.686812	1.26734	1.69773	1.29692
GSBRNA2T00069663001	BnaA04g20720D	42.0958	40.4328	38.8693	38.3784	32.8676	29.3956	31.4432	36.1108
GSBRNA2T00009931001	BnaA01g29200D	0.26055	0.292244	0.377468	0.311059	0	0	1.02798	0.628648
GSBRNA2T00129989001	BnaA03g04910D	1.70254	1.3552	1.83006	1.16118	3.25305	2.58837	2.45302	2.71795
GSBRNA2T00142607001	BnaC07g07910D	31.8463	30.4808	23.5305	24.6359	9.18207	9.13905	15.0301	12.1252
GSBRNA2T00128354001	BnaA07g06230D	0	0	0	0	0	0	0	0
GSBRNA2T00128254001	BnaA07g05490D	3.41459	4.19394	3.55854	4.32314	3.27252	3.33032	3.93426	2.99238
GSBRNA2T00013336001	BnaC08g47270D	0	0	0	0	0	0	0.058535	0
GSBRNA2T00131920001	BnaC06g20280D	2.5126	2.12409	1.86494	1.72855	8.2149	9.22456	7.14901	7.9605
GSBRNA2T00092605001	BnaCnng17140D	0	0	0.031948	0	0	0	0.029985	0
GSBRNA2T00111476001	BnaC05g24450D	0	0	0	0	0	0	0	0
GSBRNA2T00064676001	BnaA10g05630D	0	0	0	0	0	0	0	0
GSBRNA2T00073433001	BnaA09g15470D	0	0	0	0	0	0	0	0
GSBRNA2T00142094001	BnaA03g14330D	0	0	0	0	0	0	0	0
GSBRNA2T00083780001	BnaC01g30140D	0	0	0	0	0	0	0	0
GSBRNA2T00092235001	BnaAnng10190D	4.4629	4.66047	4.35503	4.02416	0.304957	0.566598	0.865161	1.12573
GSBRNA2T00121857001	BnaA09g37680D	0	0	0	0	0	0	0	0
GSBRNA2T00140219001	BnaC03g04960D	0	0	0	0	0	0	0	0
GSBRNA2T00001656001	BnaC03g63580D	0	0	0	0	0	0	0	0
GSBRNA2T00047340001	BnaC08g15050D	0	0	0	0	0	0.031757	0	0
GSBRNA2T00034332001	BnaA04g27540D	9.97833	9.542	8.06918	8.82673	4.92799	5.41324	3.79676	4.33505
GSBRNA2T00088882001	BnaCnng64270D	0	0	0	0	0	0	0	0
GSBRNA2T00115438001	BnaC07g21380D	6.27386	6.17037	2.84639	3.93026	0.041292	0.085414	0.303604	0.182564
GSBRNA2T00106917001	BnaC09g50160D	29.2708	28.6581	27.6545	24.3772	13.7434	14.6168	9.53348	8.80245
GSBRNA2T00143692001	BnaC06g22480D	0.220149	0.112054	0.03712	0.02507	0	0	1.11445	1.1398
GSBRNA2T00120250001	BnaC02g40810D	1.90332	1.44313	1.47264	1.44058	0.161882	0.29216	1.024	1.1604
Brassica_napus_newGene_13055	--	1.36548	1.25133	1.19808	0.996958	2.98841	3.7223	3.98945	4.01098
GSBRNA2T00148513001	BnaC04g17780D	0	0	0	0	15.583	15.9277	16.3999	15.8336
GSBRNA2T00053996001	BnaC01g37100D	1.33898	1.21514	1.43383	1.15744	2.09036	2.02455	1.14152	1.43286
GSBRNA2T00032018001	BnaC05g04420D	0.304735	0.630182	0.463283	0.330864	0.163642	0.114135	0.327377	0.046475
GSBRNA2T00071034001	BnaC04g26670D	14.5282	13.3147	27.9041	24.8965	6.45853	7.00174	5.86066	7.09945
GSBRNA2T00099520001	BnaA07g22830D	0.123675	0.686997	0.394029	0.452336	0	0	0	0
GSBRNA2T00094791001	BnaC09g40170D	12.0449	10.7567	17.6062	11.0359	5.90235	7.40503	4.87031	4.69316
GSBRNA2T00083486001	BnaCnng62060D	0.201451	0.117666	0.709296	0.479057	0.066604	0	1.05703	0.930902
GSBRNA2T00068628001	BnaA09g10660D	15.4413	13.2924	12.3915	11.7466	9.22142	10.8492	11.8876	10.3775
GSBRNA2T00069038001	BnaC02g00160D	0.324781	0.084735	0.09122	0.073187	0.102641	0.065213	0	0
GSBRNA2T00110098001	BnaC07g13820D	73.2566	79.1792	65.4852	74.0616	18.9973	19.1784	26.6745	24.7229
GSBRNA2T00070590001	BnaA09g13560D	0.905744	0.996185	1.62425	1.22934	0.305249	0.082982	0.278685	0.156901
GSBRNA2T00119802001	BnaC03g28450D	0.627271	0.783361	0.759585	0.887553	0	0.113749	0	0.098099
GSBRNA2T00001812001	BnaA06g34240D	0.212475	0.159135	0.138264	0.221054	0	0	0	0
GSBRNA2T00065513001	BnaA09g11930D	1.89995	1.83999	1.39375	1.52522	0.107389	0	0.592793	0.57736
GSBRNA2T00067188001	BnaA02g17340D	0.111177	0.102806	0.248471	0.235648	0.233629	0.132167	0.176738	0.140551
GSBRNA2T00079920001	BnaA07g07760D	0.026889	0	0	0	1.05134	0.899842	0.579578	1.09283
GSBRNA2T00014291001	BnaCnng27260D	18.4123	17.9541	17.8599	18.4964	11.2955	13.2335	14.5079	12.3132
GSBRNA2T00107958001	BnaC09g24550D	0	0	0	0	0	0	0	0
GSBRNA2T00091692001	BnaA02g24200D	0	0	0	0	0	0	0	0
GSBRNA2T00095697001	BnaC03g65590D	5.401	5.09226	6.22946	3.99712	0	0	0	0.114238
GSBRNA2T00024239001	BnaC04g02100D	24.7599	18.0666	41.891	50.6983	8.08686	15.0919	2.03909	0.977711
GSBRNA2T00152970001	BnaC02g15900D	0	0	0	0	0	0	0	0
GSBRNA2T00154412001	BnaA10g16510D	4.39695	4.58862	4.35556	3.43718	2.95896	3.18056	2.39754	2.78973
GSBRNA2T00141472001	BnaC03g51540D	4.63499	4.08918	3.47462	3.75813	1.95679	1.76596	3.34753	4.27229
GSBRNA2T00021549001	BnaC07g31110D	29.8763	32.0167	31.0636	31.6581	4.98964	5.53301	12.6192	13.3462
GSBRNA2T00047772001	BnaC05g15950D	0	0	0.306055	0	1.11116	0.095778	0.335988	0.188874
GSBRNA2T00082771001	BnaC03g16520D	7.45099	7.10536	9.29053	11.6649	0.42687	0.417745	3.31125	3.85759
GSBRNA2T00081616001	BnaA06g33940D	6.01674	6.06277	6.90752	7.79609	1.94466	2.35748	2.24356	2.12115
GSBRNA2T00157022001	BnaC07g37460D	246.316	264.076	199.31	193.49	30.5266	26.5231	58.2836	66.0111
GSBRNA2T00119830001	BnaC03g28670D	2.89578	3.23622	3.41281	2.71571	2.06308	3.08267	2.6039	1.97253
GSBRNA2T00142904001	BnaC07g25710D	2.69123	3.60478	3.86308	2.67396	1.24819	2.03031	3.00924	2.8487
GSBRNA2T00047456001	BnaA02g34500D	0	0	0	0	0	0	0	0
GSBRNA2T00113069001	BnaC06g29230D	6.1458	6.52367	7.05588	7.14772	3.54607	4.2361	3.86286	3.89417
GSBRNA2T00134305001	BnaC03g01540D	0	0	0	0	0	0	0	0
GSBRNA2T00023794001	BnaC05g40030D	7.08209	6.95796	6.84498	5.5286	5.21022	5.88017	4.28037	6.11994
GSBRNA2T00127493001	BnaC08g35390D	0.460647	0.347845	0	0.157313	0	0	0	0
GSBRNA2T00043512001	BnaAnng03380D	1.72462	1.71469	2.18405	2.55215	1.97461	2.03247	4.53595	2.6207
GSBRNA2T00130456001	BnaC01g06950D	0	0	0	0	0	0	0	0
GSBRNA2T00119607001	BnaAnng00700D	0	0	0	0	0	0	0	0
GSBRNA2T00144608001	BnaA06g31760D	0.998435	1.62915	2.06861	2.08532	0.346074	0.626234	0.852161	0.53427
GSBRNA2T00124663001	BnaC06g14830D	2.643	3.2435	3.43387	2.99919	2.05786	1.49415	1.75785	1.73453
Brassica_napus_newGene_1280	--	5.18913	5.65376	5.45335	4.12587	4.8716	6.23273	6.07401	4.59833
GSBRNA2T00126044001	BnaC01g25900D	0	0	0	0	0	0	0	0
GSBRNA2T00143466001	BnaA02g00940D	0	0	0	0	0	0	0	0
GSBRNA2T00150090001	BnaC03g46020D	0	0	0	0	0	0	0	0
GSBRNA2T00081442001	BnaCnng61120D	0	0	0	0	0	0	0	0
GSBRNA2T00140399001	BnaC03g06440D	2.07267	1.66712	5.99508	6.00824	1.00445	0.343734	8.40166	6.27545
GSBRNA2T00065639001	BnaA10g11270D	0	0	0	0	0	0	0	0
GSBRNA2T00105050001	BnaC04g41680D	0	0	0	0	0	0	0	0
GSBRNA2T00137341001	BnaA03g35820D	0	0	0	0	0	0	0	0
GSBRNA2T00014455001	BnaA05g36150D	2.44602	2.43936	2.82136	1.69412	1.44422	1.53468	1.06488	1.23948
GSBRNA2T00135418001	BnaA10g17920D	2.04745	1.96498	2.21976	1.91078	1.05699	0.768255	1.17896	1.39347
GSBRNA2T00151568001	BnaA03g25330D	1.01228	1.04609	0.878133	0.6447	1.0573	1.03696	1.147	1.66417
GSBRNA2T00102917001	BnaA08g22460D	0	0	0	0	0	0	0	0
GSBRNA2T00124213001	BnaC05g26740D	5.50961	5.30951	6.13578	5.94279	6.01885	5.97231	4.6696	4.88232
GSBRNA2T00100920001	BnaC09g15880D	0.1611	0.139717	0.285385	0.338266	0.044738	0.03632	0.176875	0.368812
GSBRNA2T00136860001	BnaC08g37000D	0	0	0	0	0	0.08634	0	0
GSBRNA2T00065659001	BnaA10g11410D	0	0	0	0	0	0	0	0
GSBRNA2T00126370001	BnaA04g03650D	24.2024	21.7158	20.7211	19.8169	17.0126	16.6606	19.3747	13.2408
GSBRNA2T00107419001	BnaC05g33300D	0.230105	0.106139	0.172794	0.03123	0.105372	0.041156	0.027584	0.032175
GSBRNA2T00061644001	BnaC08g08960D	0.040442	0	0.113295	0	2.31495	2.58	1.19264	0.965028
GSBRNA2T00100524001	BnaC05g06610D	6.83013	5.98761	7.05661	4.53578	4.95611	5.85665	5.11019	5.75966
GSBRNA2T00041107001	BnaC09g51820D	7.30169	7.60102	7.0182	6.74636	2.1925	2.20427	1.49516	2.24651
GSBRNA2T00021021001	BnaA08g05530D	22.8999	20.2979	33.6854	31.054	7.50674	7.56129	5.43672	6.59398
GSBRNA2T00082039001	BnaAnng29160D	3.37722	2.95312	2.33053	2.64283	0.617555	0.829744	0.692177	0.940997
GSBRNA2T00113607001	BnaA03g39710D	0.425614	0.890344	0.962205	0.724204	0	0	2.33652	3.10923
GSBRNA2T00033792001	BnaCnng37810D	8.16939	7.72834	7.90252	7.67497	1.38454	0.894936	1.56547	1.0017
GSBRNA2T00144973001	BnaC07g05980D	0	0	0	0	0	0	0	0
GSBRNA2T00142702001	BnaC07g07640D	10.8785	9.94719	7.62456	8.39089	1.91734	2.13331	2.74708	2.49239
GSBRNA2T00147567001	BnaA06g27180D	0.046872	0.348844	0.382803	0.438814	0	0	0	0
GSBRNA2T00113233001	BnaC02g27750D	23.1148	26.0285	37.7353	38.7807	4.18875	4.06457	9.09407	11.3917
GSBRNA2T00051865001	BnaC01g36630D	0.263359	0.405111	0.4283	0.459741	0.179408	0.17546	0.128802	0.391458
GSBRNA2T00124428001	BnaA07g25140D	2.51182	2.25027	1.94657	1.70856	0.600859	0.567471	0.558113	0.817049
Brassica_napus_newGene_12714	--	1.31664	1.15464	1.08918	0.911018	0.594768	0.750609	1.62134	1.0393
GSBRNA2T00034106001	BnaC02g46680D	0	0	0	0	0	0	0	0
GSBRNA2T00145508001	BnaA09g21690D	0.201081	0.177662	0.248506	0.172608	3.81731	4.31999	1.94552	1.69759
GSBRNA2T00031763001	BnaC08g44650D	1.61643	1.621	1.1483	1.46595	1.2904	0.853177	1.11361	1.51461
GSBRNA2T00001312001	BnaA02g05220D	94.6398	96.5781	87.4943	90.1972	96.9325	98.6126	109.548	96.3499
GSBRNA2T00146522001	BnaA07g33430D	3.80326	3.38449	4.77218	4.00748	4.49655	4.0489	3.38966	3.64711
GSBRNA2T00016132001	BnaA09g43990D	64.5377	65.1264	66.3939	64.1242	22.9422	32.273	51.0151	35.5556
GSBRNA2T00017180001	BnaC06g04670D	19.5843	17.3245	16.0429	16.3383	22.9959	20.2549	14.3556	13.7472
GSBRNA2T00060391001	BnaC04g32690D	0	0	0	0	0	0	0	0
GSBRNA2T00039275001	BnaCnng42040D	0	0	0	0	0	0	0	0
GSBRNA2T00103249001	BnaC06g32990D	2.67853	3.23209	4.02829	4.93805	1.73228	1.5727	1.8621	2.27618
GSBRNA2T00117858001	BnaA09g19480D	0.309722	0.375373	0	0	0	0	0	0
GSBRNA2T00154278001	BnaA10g15400D	71.2544	72.2852	59.7057	62.328	57.2854	51.0064	70.1684	71.9745
GSBRNA2T00109445001	BnaC09g03240D	5.63526	4.74519	5.03525	5.37048	2.51964	2.47032	5.13164	3.28298
GSBRNA2T00051565001	BnaCnng06910D	0	0	0	0	0	0	0	0
GSBRNA2T00033182001	BnaA07g10010D	0	0	0	0	1.03426	2.71681	2.61712	2.03755
GSBRNA2T00105691001	BnaC07g08840D	4.55439	4.11953	5.70143	6.06186	2.24022	2.51979	2.63767	1.73714
GSBRNA2T00104403001	BnaA02g21200D	0	0	0	0	0	0	0	0
GSBRNA2T00132713001	BnaA05g02940D	0	0	0	0	0	0	0	0
GSBRNA2T00068653001	BnaC02g42870D	2.6145	2.05676	2.43844	2.71826	2.00168	1.58845	1.31572	0.952285
GSBRNA2T00043262001	BnaA03g53940D	21.9308	22.2856	29.6101	29.8966	44.5743	41.445	63.437	82.3237
GSBRNA2T00094662001	BnaA09g05990D	0	0	0	0	0	0	0	0
GSBRNA2T00147631001	BnaA06g27650D	5.45624	5.98376	6.19559	6.85022	1.53051	2.38296	4.87746	4.20332
GSBRNA2T00061874001	BnaC07g13630D	1.72535	1.60951	2.06918	1.71244	0.971101	1.40573	2.72956	2.89895
GSBRNA2T00024232001	BnaA01g21720D	9.85475	8.75371	29.4176	28.3312	5.53406	6.04512	58.5617	52.4779
GSBRNA2T00067581001	BnaAnng25420D	2.80266	3.26623	3.29642	3.74516	3.0149	2.87166	2.34069	2.64162
GSBRNA2T00132749001	BnaA05g02590D	2.18762	1.57866	2.54343	2.26348	0	0	0	0
GSBRNA2T00148346001	BnaC04g17100D	0.772322	0.859616	0.871448	0.959521	0.845663	0.682928	1.17123	1.43862
GSBRNA2T00001806001	BnaA06g34200D	0	0	0	0	0	0	0	0
GSBRNA2T00064047001	BnaC08g46020D	0	0	0	0	0	0	0	0
GSBRNA2T00058211001	BnaC03g59520D	17.1551	16.7849	11.4017	12.0731	6202.79	6365.95	5904.5	5224.89
GSBRNA2T00107117001	BnaC09g48390D	44.3956	47.137	55.9119	53.7984	29.4611	30.9234	37.6549	27.6022
GSBRNA2T00128335001	BnaA07g06080D	0.313767	0.533601	0.404915	0.372537	2.49818	1.97495	1.31061	1.62032
GSBRNA2T00143706001	BnaC06g22400D	0	0	0	0	0	0	0	0
GSBRNA2T00020081001	BnaA01g36000D	0	0	0	0	0	0	0	0
GSBRNA2T00148542001	BnaC04g17910D	0	0	0	0	0	0	0	0
GSBRNA2T00054735001	BnaA06g35850D	36.6924	41.5907	43.1951	41.4273	6.3609	6.55588	4.65355	5.54625
GSBRNA2T00059069001	BnaC02g09350D	0	0	0	0	0	0	0	0
GSBRNA2T00019975001	BnaAnng38690D	3.764	4.19489	4.7643	5.12346	12.6808	11.7368	5.87832	7.10914
Brassica_napus_newGene_1420	--	0	0	0	0	0.441368	0	0	0
GSBRNA2T00078153001	BnaA06g31970D	0	0	0	0	0	0	0	0
GSBRNA2T00135478001	BnaA10g18340D	8.871	10.4618	9.61574	10.9355	3.13077	2.72164	2.37925	2.54096
GSBRNA2T00131241001	BnaC01g00670D	1.02486	0.818319	0.802892	0.669797	0.305159	0.419712	0.299179	0.410493
GSBRNA2T00129317001	BnaA09g32290D	0	0	0	0	0	0	0	0
GSBRNA2T00027600001	BnaC07g51100D	0	0	0	0	0	0	0	0
GSBRNA2T00133600001	BnaC07g29440D	0.818206	0.825174	0.667312	0.354013	0.172071	0.141975	0.324813	0.475369
GSBRNA2T00149948001	BnaC04g36170D	7.42678	7.33033	7.05691	8.0793	6.90701	6.6906	6.97998	6.83255
GSBRNA2T00143588001	BnaC06g23150D	0	0	0	0	0	0	0	0
GSBRNA2T00115106001	BnaC02g10040D	0	0	0	0	0	0	0	0
GSBRNA2T00135441001	BnaA10g18100D	3.70239	4.44773	4.48169	4.22663	3.72305	2.98	1.43408	2.83876
GSBRNA2T00138090001	BnaC01g12220D	0	0	0	0	0	0	0	0
GSBRNA2T00094192001	BnaC03g34480D	0	0	0	0	0	0	0	0
GSBRNA2T00089911001	BnaA07g08640D	1.0882	1.07912	0.843768	0.65098	0.085435	0.235507	0.47144	0.138744
GSBRNA2T00011436001	BnaC03g73160D	2.61548	2.50747	2.22393	1.89035	0.32199	0.236329	1.24296	0.945359
GSBRNA2T00083069001	BnaCnng61900D	0	0	0	0	0	0	0	0
GSBRNA2T00031658001	BnaC09g42630D	11.1966	11.0376	13.4815	15.5191	0.04438	0.101776	0.868989	0.890948
GSBRNA2T00082930001	BnaC06g10050D	0	0	0	0	0	0	0.034819	0.262974
GSBRNA2T00138166001	BnaC01g12750D	37.3016	39.1397	33.0829	32.6648	30.3025	28.8698	22.9017	24.9058
GSBRNA2T00126474001	BnaA04g04370D	41.3045	38.2612	9.53899	7.53342	0.054259	0.063758	0.713489	0.56448
GSBRNA2T00131456001	BnaA01g10220D	16.496	16.6592	15.1191	14.5911	17.301	17.5217	10.1298	12.4245
GSBRNA2T00057486001	BnaA01g32440D	2.83633	2.38234	3.27853	3.36896	0.457556	0.506963	0.216938	0.519155
GSBRNA2T00106442001	BnaC05g27830D	0	0	0	0	0.06813	0.09222	0.125322	0
GSBRNA2T00050370001	BnaA04g16670D	19.4054	21.1916	7.99669	8.12111	0.034449	0.01955	0.125951	0.105049
GSBRNA2T00061699001	BnaC08g09250D	0	0	0	0	0	0	0	0
GSBRNA2T00152310001	BnaC09g27050D	0	0	0	0	0	0	0	0
GSBRNA2T00010537001	BnaAnng35760D	0	0	0.018398	0	0	0	0	0
GSBRNA2T00035016001	BnaA09g26660D	0.189276	0.050769	0	0	0.226951	0.646432	0.298022	0.263188
GSBRNA2T00098671001	BnaA07g15800D	0	0	0	0	0	0	0	0
GSBRNA2T00128759001	BnaC07g19920D	3.2648	2.4282	2.89353	2.58729	0.644892	0.981994	1.43289	0.846545
GSBRNA2T00106417001	BnaC05g27900D	39.2409	37.4229	39.1552	36.4071	14.777	15.9919	17.0222	16.2234
GSBRNA2T00017536001	BnaC02g44140D	0	0	0	0	0	0	0	0
GSBRNA2T00057613001	BnaA01g27220D	0	0	0	0	0	0	0	0
GSBRNA2T00038649001	BnaC09g28560D	0	0	0	0	0	0	0	0
GSBRNA2T00065835001	BnaC01g10160D	0.070774	0	0	0	0.028937	0	0.090798	0.075634
GSBRNA2T00048497001	BnaA05g12290D	7.45701	7.63866	5.50639	5.90222	2.53167	3.24566	2.76603	1.74256
GSBRNA2T00033726001	BnaCnng37720D	0.073939	0.11851	0.047836	0	0	0	0.084334	0
GSBRNA2T00096133001	BnaA03g47480D	0.069799	0.023932	0.011157	0.142029	0	0.025791	0	0
Brassica_napus_newGene_8661	--	1.44405	0.810517	1.06949	2.15773	0.801556	0.426536	0.955557	1.04888
Brassica_napus_newGene_3437	--	0.884555	0.242276	0.411184	0.710603	0	0.064528	0.157099	0
GSBRNA2T00125063001	BnaC03g47390D	0.105529	0.212333	0.108932	0.169277	0.341233	0.605678	0.57313	0.670968
GSBRNA2T00091328001	BnaCnng16480D	23.2217	23.5993	22.2532	22.4146	9.98265	9.04477	6.01582	7.61026
GSBRNA2T00132960001	BnaA05g00860D	0	0	0	0	0	0	0	0
GSBRNA2T00092696001	BnaA03g50940D	55.5398	56.374	55.1039	53.6015	40.6075	42.4093	47.8752	48.1731
GSBRNA2T00053636001	BnaCnng50910D	0.222108	0.115895	0.1814	0.319485	1.09183	0.416012	0.215227	0.697949
GSBRNA2T00152899001	BnaC02g16370D	0	0	0.070398	0	0.38704	0.318542	0.7779	0.616515
GSBRNA2T00098602001	BnaA07g15300D	4.95797	4.47914	5.29191	4.77119	0.098976	0.087583	0.544193	0.120246
GSBRNA2T00042064001	BnaC09g15730D	8.97977	7.07076	8.78168	8.38471	5.75598	5.39757	5.76121	7.04497
GSBRNA2T00134772001	BnaC09g06780D	17.6854	17.1374	15.9688	16.0637	28.0916	27.5248	13.5517	14.2934
GSBRNA2T00069259001	BnaCnng57640D	0	0	0	0	0	0	0	0
GSBRNA2T00152168001	BnaC09g26470D	0	0	0	0	0	0	0	0
GSBRNA2T00056700001	BnaUnng01700D	0	0	0	0	0	0	0	0
GSBRNA2T00140837001	BnaC03g10110D	6.27753	6.2054	6.27851	6.18626	2.79093	2.49402	1.51563	2.40844
GSBRNA2T00027054001	BnaA05g30750D	0	0	0	0	0	0	0	0
GSBRNA2T00023745001	BnaC05g40370D	2.74646	2.13619	3.09045	3.96846	0.043019	0	0.045045	0.283222
GSBRNA2T00045271001	BnaA04g15910D	0.138796	0.143925	5.5399	6.77652	0.024189	0.041783	9.43087	9.4492
GSBRNA2T00024461001	BnaC03g17380D	0	0	0	0	0	0	0	0
GSBRNA2T00098680001	BnaA07g15870D	5.61513	4.84888	6.76836	5.42879	2.81108	3.82998	5.79133	5.91254
GSBRNA2T00136077001	BnaA10g23360D	0.70125	0.751297	0.517415	0.787574	0.494268	0.31948	0.137351	0.367928
GSBRNA2T00050298001	BnaA05g08620D	0	0	0	0	0	0	0	0
GSBRNA2T00124767001	BnaA03g18540D	0.034007	0.055096	0	0	0	0.063351	2.5222	2.09109
GSBRNA2T00039382001	BnaAnng18990D	0	0	0	0	0	0	0	0
GSBRNA2T00155468001	BnaC08g31120D	0	0	0	0	0	0	0	0
GSBRNA2T00109572001	BnaC09g02230D	77.901	73.8753	48.062	47.9775	4.97259	4.52032	2.93454	3.74775
GSBRNA2T00017442001	BnaAnng38030D	4.30394	2.42301	3.88938	3.84951	0.139483	0.093826	0.083951	0.638523
GSBRNA2T00062854001	BnaC03g71540D	0.411364	0.690264	0.291275	0.275181	0.287231	0.317883	1.00853	0.467297
GSBRNA2T00077594001	BnaCnng60380D	4.55388	3.06899	2.94224	4.10768	3.23184	3.86332	7.16172	3.83163
GSBRNA2T00110924001	BnaC05g42790D	21.0544	19.9594	18.1706	16.3678	0	0	0.028111	0.032791
GSBRNA2T00087487001	BnaC09g31130D	4.86563	4.34865	7.24412	5.97526	2.14885	2.02389	2.62451	3.90909
GSBRNA2T00032644001	BnaC09g39530D	0.09319	0	0	0	0	0	0	0
GSBRNA2T00155986001	BnaC08g27130D	0	0	0	0	0	0	0	0
GSBRNA2T00025847001	BnaCnng34620D	79.4625	84.5376	85.4988	80.3133	9.03718	7.81001	8.38657	8.91304
GSBRNA2T00051282001	BnaAnng21470D	0	0	0	0	0	0	0	0
GSBRNA2T00079148001	BnaC03g21250D	0.9677	1.11018	0.922064	1.00501	0.070719	0.1317	0.247872	0.276617
GSBRNA2T00000185001	BnaA05g26620D	0.476078	0.290896	0.656851	0.994614	0	0	0	0
Brassica_napus_newGene_8408	--	0.505575	0.156724	0.097906	0.286291	0	0	0	0
GSBRNA2T00046905001	BnaCnng47900D	0	0	0	0.127732	0	0.089101	0	0
GSBRNA2T00141515001	BnaC03g51320D	7.2171	8.35711	8.61265	8.78686	5.16735	4.27856	4.59564	4.83993
GSBRNA2T00145944001	BnaC09g03720D	1.69144	1.26481	2.6436	1.68685	0.505549	0.202641	2.07374	2.41054
GSBRNA2T00045218001	BnaA04g16300D	0	0	0	0	0	0	0	0
GSBRNA2T00058623001	BnaA05g16280D	0	0	0	0	0	0	0	0
GSBRNA2T00008891001	BnaC05g08660D	0	0	0	0	1.03678	0.95432	0.488703	0.678422
GSBRNA2T00134628001	BnaC03g04240D	8.63895	8.13028	8.3416	9.06842	10.7177	9.41359	7.57269	10.4859
GSBRNA2T00044336001	BnaA03g49070D	0.130484	0	0	0	0	0	0	0
GSBRNA2T00138632001	BnaA01g21180D	0	0.030151	0	0	0.091307	0.033281	0.094119	0.148694
GSBRNA2T00153841001	BnaA05g22650D	0	0.082189	0.147287	0	0	0	0	0.27754
GSBRNA2T00102389001	BnaC02g13910D	0.508153	0.555343	0.859186	0.909268	1.50072	2.02741	1.33515	1.71184
Brassica_napus_newGene_8136	--	7.13529	4.76211	4.94236	6.52574	1.0764	1.9928	2.74686	2.76462
GSBRNA2T00132449001	BnaC03g19920D	0	0	0	0	0	0	0	0
GSBRNA2T00008284001	BnaAnng11860D	5.50826	4.24592	5.37317	3.9764	1.82352	2.36059	2.43474	2.37369
GSBRNA2T00034386001	BnaC03g76460D	0	0	0	0	0	0	0	0
GSBRNA2T00063865001	BnaC02g33520D	0.046049	0.064642	0.037275	0	0	0	0	0
GSBRNA2T00114748001	BnaC02g08140D	0	0	0	0	0.015364	0.077051	0.041699	0.089163
GSBRNA2T00031563001	BnaC09g43300D	3.52752	3.63604	4.28641	3.93897	0.409165	0.468208	2.15171	2.24013
GSBRNA2T00107800001	BnaC01g10930D	6.5118	7.81397	9.35372	8.67967	6.17667	6.41757	10.2345	10.6567
GSBRNA2T00020764001	BnaC06g41270D	0	0	0	0	0	0	0	0
Brassica_napus_newGene_115	--	3.35391	2.65991	2.8093	2.43948	1.65714	2.08318	1.56198	1.3661
GSBRNA2T00095739001	BnaC03g65380D	0.471216	0.295602	0.214199	0.331396	0	0	0	0
GSBRNA2T00037860001	BnaA01g36950D	3.7847	4.11827	4.83595	4.78341	0.155963	0.156089	0.723976	0.618404
GSBRNA2T00086259001	BnaC02g43260D	0	0	0	0	0	0	0	0
GSBRNA2T00101895001	BnaC05g36480D	3.87731	2.81143	4.48228	4.75353	0.420071	0.560454	0.490235	0.389144
GSBRNA2T00085761001	BnaA08g01850D	1.07601	0.933392	1.10956	1.33797	0.624099	0.856452	0.638811	0.605244
GSBRNA2T00145374001	BnaC08g00130D	0	0	0	0	0	0	0	0
GSBRNA2T00069369001	BnaA09g35010D	5.51565	6.47518	6.85616	7.33919	4.30842	5.09529	12.2649	14.8886
GSBRNA2T00083364001	BnaA05g20600D	139.804	134.542	101.777	106.931	4.58239	4.96862	10.8785	10.7569
GSBRNA2T00017929001	BnaCnng73860D	0	0	0	0	0	0	0	0
GSBRNA2T00145323001	BnaC08g00480D	1.92866	2.17867	2.50386	1.86035	3.30589	3.02761	1.50613	1.96283
GSBRNA2T00119899001	BnaC03g29190D	0.739233	0.584255	0.810061	0.383184	0.286096	0.274724	0.54138	0.725749
GSBRNA2T00085142001	BnaCnng04470D	1.44417	1.45346	1.30974	1.32615	0.976772	1.4081	1.33392	1.29019
GSBRNA2T00041596001	BnaC06g26910D	0	0	0	0	0	0	0	0
GSBRNA2T00031464001	BnaC07g32960D	21.8797	19.6941	15.6462	13.8862	0.071211	0	0	0.061508
GSBRNA2T00029130001	BnaC06g04080D	3.63154	3.12086	3.46647	3.13955	1.2685	2.09695	1.3911	1.72396
GSBRNA2T00147130001	BnaC06g09530D	0	0	0	0	0	0	0	0
GSBRNA2T00076189001	BnaA07g07640D	0	0	0	0	0	0	0	0
GSBRNA2T00012261001	BnaC04g36330D	1.45328	1.19398	1.19633	1.36541	1.31469	1.46851	2.01895	1.16922
GSBRNA2T00136134001	BnaA10g23850D	0.129057	0.193824	0.338068	0.294316	0.193819	0.110415	0.056373	0.113272
GSBRNA2T00155895001	BnaC08g27790D	5.55807	5.51707	7.39101	7.65452	1.73299	0.914812	2.15288	2.66381
GSBRNA2T00140321001	BnaC03g05770D	26.675	26.2618	20.8819	20.6405	15.9915	17.7244	16.412	13.0399
GSBRNA2T00063450001	BnaC02g34860D	0.120809	0.016128	0.052655	0.041314	0	0	0	0
GSBRNA2T00069872001	BnaC02g33420D	2.97892	3.92837	3.60074	3.27948	1.5178	1.84638	2.74625	1.99594
GSBRNA2T00021674001	BnaC09g19060D	0.6956	0.579764	0.413211	0.160083	0.882554	1.39603	0.478482	0.211234
GSBRNA2T00077361001	BnaC03g14720D	285.158	280.041	255.387	252.145	9.411	10.2449	22.2947	26.5552
GSBRNA2T00045042001	BnaA09g09190D	1.32185	2.10367	0.979631	2.23761	0.528902	0.570106	0.975832	0.318663
GSBRNA2T00051645001	BnaA01g17700D	3.02684	2.787	3.25428	4.27266	1.33093	1.54441	4.12873	3.07
GSBRNA2T00055260001	BnaCnng07350D	29.3636	30.1071	25.6274	24.8665	44.2391	44.42	39.9944	46.4804
GSBRNA2T00043344001	BnaA05g15660D	29.9045	25.5391	31.6739	31.1175	0	0	0	0
GSBRNA2T00026827001	BnaA01g22230D	19.8736	20.3148	19.0783	20.3835	12.12	12.7324	13.4422	11.9004
GSBRNA2T00097740001	BnaCnng19910D	0.321058	0.13499	0.229245	0.304532	0	0	0	0
GSBRNA2T00112512001	BnaC07g34880D	45.7571	45.0562	30.7303	32.4248	24.8013	22.8395	18.198	16.1696
GSBRNA2T00123112001	BnaC01g09430D	0	0	0	0	0	0	0	0
GSBRNA2T00052953001	BnaC08g02660D	3.28973	3.53072	2.94193	3.79925	5.19104	4.12583	6.32113	5.69329
GSBRNA2T00104041001	BnaC09g45600D	1.33069	1.64739	1.12004	1.41484	2.08532	1.63887	1.58496	1.72057
GSBRNA2T00069452001	BnaA07g09180D	9.26085	8.64869	3.60936	2.87537	0	0	0	0
GSBRNA2T00041784001	BnaC07g32520D	14.5401	13.0035	12.882	12.7899	12.6457	11.2887	15.0823	11.7243
GSBRNA2T00082502001	BnaCnng13680D	0.07326	0.178039	0.125322	0.139898	0	0	0.104547	0.073169
GSBRNA2T00028930001	BnaC06g18260D	0	0	0	0	0.012653	0	0	0
GSBRNA2T00113094001	BnaC06g29390D	0	0	0	0	0	0	0	0
GSBRNA2T00103457001	BnaC06g34640D	3.11757	3.48858	4.36495	3.2114	1.92342	2.19886	3.46076	3.08099
GSBRNA2T00111600001	BnaA03g31640D	5.11499	7.06259	5.79572	7.10591	10.7214	9.32562	61.3979	48.4615
GSBRNA2T00139535001	BnaC08g18570D	8.32761	9.22665	5.26959	5.08926	0.302556	0.68868	0.483786	1.13925
GSBRNA2T00103756001	BnaC02g30190D	0	0	0	0	0	0	0	0
GSBRNA2T00025384001	BnaCnng76270D	4.54101	5.44891	6.12298	5.49933	5.20389	4.52869	5.3374	4.7027
GSBRNA2T00094320001	BnaC09g37340D	48.0937	44.9545	45.0593	43.637	15.9101	15.7588	47.0686	36.6762
Brassica_napus_newGene_11304	--	10.8417	9.94804	12.6681	12.0935	4.99328	6.85315	8.53113	7.21201
GSBRNA2T00014965001	BnaCnng27970D	4.2568	3.92469	4.39216	4.4589	4.96099	4.05029	6.12497	8.42015
Brassica_napus_newGene_5095	--	2.44686	2.69153	2.3194	3.00468	1.16111	0.876013	2.0952	1.58186
GSBRNA2T00078943001	BnaA10g07240D	1.02956	2.1625	0.703336	1.14262	0	0	0	0
GSBRNA2T00122051001	BnaA09g50430D	1.5437	1.25206	2.42448	4.63876	0.110457	0	2.27639	3.34092
GSBRNA2T00066741001	BnaA03g12850D	0	0	0	0	0	0	0	0
GSBRNA2T00094694001	BnaA09g05720D	0	0	0	0	0	0	0	0
GSBRNA2T00109562001	BnaC09g02310D	4.55583	4.98095	5.73213	4.71065	0.642236	0.811091	0.762577	0.431129
GSBRNA2T00067866001	BnaAnng05360D	6.12092	7.81463	7.34848	7.2787	5.23392	5.14584	3.56774	5.71559
GSBRNA2T00156224001	BnaA06g05000D	6.49859	7.1461	52.9802	49.4179	0	0.087107	0.641531	0.840178
GSBRNA2T00086915001	BnaAnng08760D	0	0	0.087466	0.134919	27.4268	27.0627	41.902	40.7756
GSBRNA2T00107421001	BnaC05g33320D	6.07818	5.73618	6.6426	6.56584	3.26802	2.57496	2.17682	2.78279
GSBRNA2T00139230001	BnaC07g23160D	0	0	0	0	0	0	0	0
GSBRNA2T00018280001	BnaC09g00560D	10.8005	11.0202	11.6947	9.78286	7.9797	7.26135	6.40671	6.45834
GSBRNA2T00043781001	BnaCnng45490D	8.02898	6.36572	7.23327	7.26748	4.37241	5.7222	5.48449	5.21846
GSBRNA2T00004812001	BnaCnng21760D	0	0	0	0	0	0	0	0
GSBRNA2T00064540001	BnaC04g30000D	0	0	0	0	0	0	0	0
GSBRNA2T00010067001	BnaA01g28090D	0.447237	0.281341	0.345441	0.360446	0.020224	0	0.042282	0
GSBRNA2T00118211001	BnaC04g18510D	0	0	0	0	0	0	0	0
GSBRNA2T00121146001	BnaA01g04240D	0	0	0	0	0	0	0	0
GSBRNA2T00007281001	BnaC03g71800D	11.6847	11.2229	19.3815	18.3475	1.00852	1.16636	2.27263	2.83462
GSBRNA2T00154979001	BnaA03g37930D	1.00887	1.06859	1.40261	1.01699	1.03184	0.819925	0.972203	0.778015
GSBRNA2T00137919001	BnaC07g01950D	4.52874	4.3063	4.35003	3.90512	2.43851	1.78914	1.4023	2.0893
GSBRNA2T00088603001	BnaA04g24550D	7.44913	8.60004	8.27112	8.87271	7.06239	6.36858	3.98532	4.16246
GSBRNA2T00157791001	BnaC09g22950D	18.2002	19.2205	34.7161	32.4507	18.8081	21.0758	67.4156	64.3104
GSBRNA2T00135524001	BnaA10g18730D	3.45069	3.36787	3.46734	3.64095	5.73748	5.77908	4.27921	6.02812
GSBRNA2T00055455001	BnaA02g30460D	34.5429	33.8937	36.3162	38.5309	10.1041	12.467	23.1645	15.2131
GSBRNA2T00107153001	BnaC09g48090D	0.68187	0.75797	1.13077	1.31998	0	0	0.040711	0.071923
GSBRNA2T00128315001	BnaA07g05900D	1.7723	2.49542	3.32335	2.32372	1.7842	2.32788	2.00435	2.94836
GSBRNA2T00009578001	BnaA09g04720D	1.54967	1.77698	2.14364	1.39724	0.272344	0.099815	0.453477	0.746889
Brassica_napus_newGene_4511	--	10.0492	8.94151	8.72315	9.28782	7.13078	7.30292	9.05637	9.40655
GSBRNA2T00067280001	BnaA01g29410D	0.766558	0.142377	0.138201	0.321284	139.568	140.348	101.713	96.4667
GSBRNA2T00045121001	BnaA04g25220D	0	0	0	0	0.163167	0.314182	0.650707	0.372563
GSBRNA2T00043592001	BnaA01g19180D	0.086775	0.044574	0.034937	0.054519	0.749928	0.623653	1.15904	1.3221
GSBRNA2T00067902001	BnaAnng05710D	4.65831	5.09628	2.12644	2.06965	0.471295	0.446242	4.98613	5.78538
GSBRNA2T00131571001	BnaA01g11070D	3.05631	2.08472	1.89771	1.71756	2.00818	2.24419	1.87477	1.40438
GSBRNA2T00017872001	BnaA02g20240D	9.73719	10.2348	9.10694	11.0917	5.0675	4.09363	2.15941	3.27914
GSBRNA2T00068961001	BnaC05g12590D	0	0	0	0	0	0.481908	2.75459	2.81761
GSBRNA2T00027422001	BnaUnng05020D	0	0	0	0	0	0	0	0
GSBRNA2T00039643001	BnaC08g49380D	0	0	0	0	9.39022	6.46316	11.5029	11.0002
Brassica_napus_newGene_8505	--	26.7011	27.3768	27.5297	37.6967	0	0	0	0
GSBRNA2T00021399001	BnaC03g40880D	7.81822	6.86551	6.74713	5.68073	13.1945	13.3444	10.509	12.1929
GSBRNA2T00047338001	BnaC03g46830D	0	0	0	0	0	0	0	0
GSBRNA2T00029953001	BnaAnng41270D	0	0.045374	0	0	0	0	0	0
GSBRNA2T00120468001	BnaA02g31640D	0	0	0	0	0	0	0	0
GSBRNA2T00065269001	BnaAnng24900D	0	0	0	0	0	0	0	0
GSBRNA2T00143829001	BnaC06g21640D	0	0	0	0	0	0	0	0
GSBRNA2T00066200001	BnaC03g26560D	0.1546	0.064115	0.256263	0	0.160939	0.073475	0	0
GSBRNA2T00125051001	BnaC03g47450D	6.25635	6.1954	6.63365	5.96522	1.44273	1.23538	3.1106	3.68611
GSBRNA2T00135710001	BnaA10g20310D	2.00452	2.24584	2.28394	2.72533	1.98504	2.30793	2.65712	2.28783
GSBRNA2T00099437001	BnaA07g22180D	0	0	0	0	0	0	0	0
GSBRNA2T00083602001	BnaC03g66180D	0	0	0	0	0	0	0	0
GSBRNA2T00095545001	BnaC09g21200D	0	0	0	0	0	0	0	0
GSBRNA2T00036843001	BnaA02g10510D	0.428668	0.732806	0.041375	0.060095	0	0	0	0
GSBRNA2T00140174001	BnaC03g04640D	15.1082	14.5414	18.7387	19.4535	5.21577	5.18076	7.14332	6.22972
GSBRNA2T00137699001	BnaA03g32810D	0.027529	0.033451	0.033426	0	0.017068	0.095804	0.211674	0.082486
GSBRNA2T00035858001	BnaC03g77650D	40.1157	40.8059	42.8591	44.2028	3.65626	4.20211	8.5173	5.9219
GSBRNA2T00054397001	BnaC07g49860D	7.63303	7.65141	4.41235	4.53465	2.77673	3.18161	3.87675	3.35931
GSBRNA2T00049579001	BnaA09g40650D	9.90804	8.49263	10.5124	11.1437	6.35098	7.34342	10.3401	5.85781
GSBRNA2T00000385001	BnaA05g28300D	0.82639	0.843781	0.626927	0.969866	0.05815	0.085194	0.098154	0.304055
GSBRNA2T00157844001	BnaC09g22680D	0.081013	0.095111	0.153645	0.11614	0.337955	0.619343	0.201062	0
GSBRNA2T00115678001	BnaC09g19630D	0	0	0	0	0	0	0	0
GSBRNA2T00140283001	BnaC03g05440D	0	0	0	0	0	0	0	0
GSBRNA2T00136808001	BnaC08g37390D	31.0706	33.3595	28.3009	28.0085	14.2929	13.6539	11.7737	11.8008
Brassica_napus_newGene_412	--	14.0531	13.5078	14.8827	13.7348	7.44366	5.45032	7.83757	5.87832
GSBRNA2T00130888001	BnaC01g03480D	0	0	0	0	0	0	0	0.136361
GSBRNA2T00060302001	BnaA01g30930D	6.54134	6.23983	6.18249	7.09189	4.62584	4.02498	2.55501	3.81393
GSBRNA2T00055967001	BnaC03g62660D	0	0	0	0	0	0	0	0
GSBRNA2T00155698001	BnaC08g29330D	7.66437	7.96606	7.66726	8.05385	21.5176	21.3111	11.6971	12.4763
GSBRNA2T00145708001	BnaC03g51780D	0.064819	0.192342	0.141711	0.240869	3.26824	3.07412	1.01321	0.731023
GSBRNA2T00122474001	BnaC06g12020D	3.25343	4.16981	4.17513	3.96052	13.3621	13.8716	10.8322	8.84426
GSBRNA2T00066782001	BnaA03g56790D	3.30684	2.97419	3.19474	2.75523	1.87051	2.85265	2.06074	1.62858
GSBRNA2T00062033001	BnaC05g10190D	1.88166	2.27441	2.04866	2.28597	1.72053	2.04256	1.74726	1.64869
GSBRNA2T00094328001	BnaC09g37270D	3.9285	4.78523	5.07126	5.21291	1.05407	0.87095	0.819143	1.38786
GSBRNA2T00109737001	BnaA06g21030D	0.710379	0.832972	1.02675	0.642654	0.706442	0.475029	1.17216	1.48222
GSBRNA2T00136016001	BnaA10g22870D	14.4114	13.5846	16.9781	19.1891	1.54465	1.70143	10.1662	10.8549
GSBRNA2T00125307001	BnaC03g34710D	0	0	0	0	0	0	0	0
GSBRNA2T00117091001	BnaA05g08050D	1.90226	2.08882	1.04811	1.14297	1.28002	0.757827	1.0686	0.573027
GSBRNA2T00026009001	BnaA08g29600D	17.6652	16.5778	15.9758	16.3545	147.483	138.349	100.331	107.554
GSBRNA2T00134946001	BnaC09g07870D	0	0	0	0	0	0	0	0
GSBRNA2T00150190001	BnaC03g46700D	0	0	0	0	0	0	0	0
GSBRNA2T00094341001	BnaC09g37170D	33.9631	33.3415	45.0509	45.6492	12.3293	12.4336	41.1041	36.8669
GSBRNA2T00032754001	BnaC09g11390D	0.360243	0.301008	0.196585	0	0	0	0	0
GSBRNA2T00119846001	BnaC03g28810D	8.7034	10.8821	18.719	16.7446	1.61781	2.21047	19.7571	9.26019
GSBRNA2T00068641001	BnaC02g42940D	5.28833	4.86816	5.34446	3.81612	2.10718	2.63631	3.95763	3.54525
GSBRNA2T00130508001	BnaC01g06620D	0	0.146123	0	0	0	0	0	0
GSBRNA2T00157067001	BnaC07g37820D	1.48922	2.25668	2.41623	1.96652	1.29863	0.835578	0.580453	0.987808
GSBRNA2T00035717001	BnaC09g09110D	0.519449	0.241433	0.291501	0.262365	0	0	0	0.027003
GSBRNA2T00157124001	BnaC07g38260D	7.1559	7.0706	6.58001	6.65996	1.80703	1.93372	2.96442	3.90293
GSBRNA2T00008440001	BnaC03g73890D	0	0	0	0	0	0	0	0
GSBRNA2T00017038001	BnaC09g41480D	0.513147	0.429424	0.662078	0.709143	0.576001	0.507408	0.226645	0.947779
GSBRNA2T00136861001	BnaC08g36990D	4.77411	5.22583	3.68373	3.8029	0.160917	0.053936	0.243445	0.274424
GSBRNA2T00021590001	BnaC09g18590D	0	0	0	0	0	0	0	0
GSBRNA2T00009552001	BnaA09g04550D	4.09559	4.04004	6.78012	5.72406	4.5117	3.6631	5.85273	4.83909
GSBRNA2T00151774001	BnaC02g05850D	7.68043	6.75947	6.10408	6.27519	8.10992	7.88319	3.92855	5.44721
Brassica_napus_newGene_5946	--	1.24027	1.00348	1.38093	1.26495	0.601491	0.648106	1.49702	1.41879
GSBRNA2T00127810001	BnaC04g39710D	5.16127	6.52147	6.1149	7.01442	4.31486	3.79836	3.37237	4.09042
GSBRNA2T00155425001	BnaC08g31420D	0.326798	0.100378	0.132265	0.350723	5.22355	4.49616	3.90861	5.45705
GSBRNA2T00004725001	BnaA08g31350D	0	0.032508	0	0.034783	0	0	0	0.133685
GSBRNA2T00022853001	BnaA01g36740D	0	0	0	0	0	0	0	0
GSBRNA2T00052112001	BnaAnng21530D	1.2118	1.09841	0.811224	1.03276	4.24833	5.10052	1.53079	1.90657
GSBRNA2T00153528001	BnaC03g32030D	33.8198	33.9544	32.7391	29.5795	13.7129	13.4743	11.8555	14.3011
GSBRNA2T00106212001	BnaC05g38200D	19.6205	20.5667	31.5418	25.6729	0	0	0	0
GSBRNA2T00092406001	BnaA09g25160D	3.84463	3.69408	2.04641	2.13706	1.28982	1.86041	0.602981	0.674698
GSBRNA2T00089754001	BnaA08g28590D	0	0	0.003908	0	0	0.009054	0	0
GSBRNA2T00087086001	BnaA10g03680D	14.0866	14.0199	12.8008	13.5144	11.0934	11.3096	10.3984	8.73764
GSBRNA2T00155114001	BnaC04g47160D	0	0	0	0	0	0	0	0
GSBRNA2T00036357001	BnaC04g56280D	1.9588	2.39797	1.94677	1.92053	1.81964	1.56726	1.25565	1.19165
GSBRNA2T00050069001	BnaC03g57690D	4.11196	4.45724	4.60074	4.72376	0.205373	0.200711	0.617438	0.649455
GSBRNA2T00049553001	BnaA09g40460D	0	0	0	0	0	0	0	0
GSBRNA2T00063504001	BnaC02g35060D	0	0	0	0	0	0	0	0
GSBRNA2T00142893001	BnaC07g25630D	4.87694	3.97874	3.5307	4.75737	3.34416	4.61301	5.3176	4.30025
GSBRNA2T00106616001	BnaC05g27220D	0	0	0	0	0	0	0	0
GSBRNA2T00011448001	BnaC04g44090D	1.71894	2.80034	3.95818	3.07125	0	0	0	0
GSBRNA2T00060793001	BnaC03g13710D	0	0	0	0	0	0	0	0
GSBRNA2T00109293001	BnaC08g23040D	0	0	0	0	0	0	0	0
GSBRNA2T00092864001	BnaA05g32890D	11.3554	10.2215	13.4013	14.6571	0	0	0	0
GSBRNA2T00034276001	BnaA04g27180D	0.704898	0.794588	0.406504	0.63772	0.131763	0.105296	0.077636	0.060204
GSBRNA2T00029749001	BnaA05g35690D	0	0	0	0	0	0.21378	0	0.148787
GSBRNA2T00146543001	BnaA07g33230D	60.9065	60.8928	58.7121	58.6151	5.83405	5.73273	5.60364	5.51191
GSBRNA2T00087952001	BnaCnng15330D	0.684828	0.74251	0.746649	1.15519	0.471656	0.55976	0.570918	0.668929
GSBRNA2T00082278001	BnaC09g21470D	14.9975	14.9752	15.7579	16.9813	6.37305	5.70753	4.98267	6.00747
GSBRNA2T00083588001	BnaC03g66100D	0	0	0	0	0	0	0	0
GSBRNA2T00013653001	BnaAnng36660D	13.5075	12.5386	12.91	9.66391	0.121351	0.318072	1.07685	0.771175
GSBRNA2T00141727001	BnaC03g49990D	4.6976	3.50156	3.77141	3.78703	5.68851	6.51297	8.05713	5.58714
GSBRNA2T00022392001	BnaC04g56870D	0.039515	0.017904	0.066642	0.122848	0.048987	0	0.152403	0.08462
GSBRNA2T00021993001	BnaC04g49170D	0	0	0	0	0	0	0	0
GSBRNA2T00063849001	BnaA01g25430D	0	0	0	0	0	0	0	0
GSBRNA2T00047239001	BnaA08g27000D	0	0.244935	0.441533	0.271019	0	0	0	0
Brassica_napus_newGene_10331	--	23.0842	7.7346	19.1048	14.4033	0	0	0	0
GSBRNA2T00055281001	BnaCnng07460D	0.352132	0.350814	0.283359	0.089959	0.055133	0.090418	0	0.045721
GSBRNA2T00094161001	BnaC03g76100D	0	0	0	0	0	0	0	0
GSBRNA2T00001606001	BnaC03g63350D	0	0	0	0	0	0	0	0
GSBRNA2T00115531001	BnaC06g08410D	16.7453	15.0515	14.7676	17.141	3.59462	2.66072	5.91146	5.36439
GSBRNA2T00045867001	BnaAnng03640D	0	0	0	0	0	0	0	0
GSBRNA2T00101942001	BnaA07g28010D	0	0	0	0.034743	0	0	0.025333	0
GSBRNA2T00140892001	BnaC03g10550D	0	0.312579	0	0.359329	0.44483	0.465463	0	0
GSBRNA2T00083109001	BnaA02g17980D	0	0	0	0	0	0	0	0
GSBRNA2T00134910001	BnaC09g07670D	0.090142	0	0.30779	0.354903	0.457833	0.246891	0.079182	0.203022
GSBRNA2T00116271001	BnaC03g68090D	0	0	0	0	0	0	0	0
GSBRNA2T00069052001	BnaC02g00030D	3.27876	2.66016	2.47609	2.36183	1.2727	0.919298	1.34424	1.02905
Brassica_napus_newGene_8662	--	4.45568	6.10822	6.3273	5.95304	2.5424	1.49709	7.50517	3.83536
GSBRNA2T00003177001	BnaUnng03840D	0	0	0	0	0	0	0	0
GSBRNA2T00076958001	BnaC02g32920D	2.87821	2.09169	3.06577	1.48812	0.080991	0.136535	0.153215	0.049461
GSBRNA2T00092536001	BnaCnng16910D	0	0	0	0	0	0	0	0
Brassica_napus_newGene_7582	--	3.9388	4.22879	3.76143	3.15679	3.1483	4.144	3.90124	2.77706
GSBRNA2T00048219001	BnaC02g48250D	4.08097	3.08116	3.31752	2.88601	2.90482	3.43042	4.23772	4.13728
Brassica_napus_newGene_6854	--	1.51604	1.4254	1.59114	1.65436	0.877274	1.13969	1.1994	0.829097
GSBRNA2T00152760001	BnaC04g07110D	7.57639	8.11668	10.112	9.52949	3.86056	3.8485	8.06621	10.4636
GSBRNA2T00155350001	BnaC04g45310D	1.5899	1.17343	1.09753	0.837749	0.499935	0.858309	0.815267	0.561394
GSBRNA2T00043201001	BnaA06g14590D	6.33366	9.30693	4.1391	5.67157	0.226523	0.286404	0.463735	0.275749
GSBRNA2T00144579001	BnaA06g31530D	0.111223	0.124713	0.076102	0.151764	0.182532	0.178961	0.081601	0.120106
GSBRNA2T00137152001	BnaC02g21770D	1.23959	1.19016	2.26168	1.81885	1.56515	1.6221	2.6787	1.73697
GSBRNA2T00031746001	BnaC08g44780D	0	0	0	0	0	0	0	0
GSBRNA2T00115727001	BnaC09g19370D	17.8628	16.3046	19.2711	19.9915	1.94117	2.22168	3.76987	3.55746
GSBRNA2T00092483001	BnaCnng65370D	0.240381	0.193157	0	0	0	0	0	0
GSBRNA2T00158400001	BnaC03g43240D	0.175282	0.211254	0.029283	0.202008	0.320154	0.221446	0.385917	0.112804
GSBRNA2T00155109001	BnaC04g47190D	1.61162	1.02872	2.21432	0.960578	3.27244	3.0422	2.32919	2.78668
GSBRNA2T00037128001	BnaA09g35500D	18.2815	21.3833	18.2432	19.6238	27.7061	27.7251	19.0266	21.5599
GSBRNA2T00095584001	BnaC09g20990D	0	0	0	0	0	0	0	0
GSBRNA2T00097854001	BnaA06g37710D	2.82504	2.54338	2.97053	2.95205	20.9598	22.0612	23.6268	20.0186
Brassica_napus_newGene_7051	--	4.27183	3.52066	5.27325	4.70351	1.90162	1.95091	1.78929	1.9901
GSBRNA2T00015739001	BnaA09g30560D	0.774815	0.974819	0.69104	0.777457	1.04957	1.3879	0.482194	0.446338
GSBRNA2T00007339001	BnaAnng34970D	1.36009	1.26117	1.71196	1.39082	4.84258	5.4061	7.28945	6.66645
GSBRNA2T00109703001	BnaC09g01170D	1.10295	1.14112	1.18883	1.2922	0.452357	0.481662	0.334257	0.583134
GSBRNA2T00019999001	BnaAnng38700D	0	0	0	0	0	0	0	0
GSBRNA2T00102721001	BnaA07g31480D	10.0646	9.97258	7.89858	7.69062	2.97297	2.87502	4.17455	4.77794
GSBRNA2T00018559001	BnaC01g39420D	0	0.057524	0	0	0	0	0	0
GSBRNA2T00044373001	BnaC05g29240D	0	0	0	0.397237	0.12994	0.157795	0	0
GSBRNA2T00059568001	BnaA05g29440D	11.0497	9.15007	9.23781	9.60437	5.70501	5.91905	7.11044	5.55123
GSBRNA2T00147581001	BnaA06g27310D	4.19637	4.28515	3.2842	4.07443	3.00117	3.13258	2.34076	2.29696
GSBRNA2T00036412001	BnaAnng18220D	0.08909	0	0.016147	0.034025	0	0	0	0
GSBRNA2T00078072001	BnaA06g32700D	3.23556	2.78565	3.9449	3.98728	0.577956	0.629464	2.02539	1.4423
GSBRNA2T00155875001	BnaC08g27970D	12.4264	14.2779	5.62961	7.32304	5.45831	6.35699	2.73938	1.82541
GSBRNA2T00135323001	BnaC02g18970D	0	0	0	0	0	0	0	0
GSBRNA2T00057680001	BnaA04g28320D	0.272637	0.408997	0.211504	0.478396	0.109994	0.169609	0.426179	0.284793
GSBRNA2T00089428001	BnaAnng09790D	0	0.031238	0	0	0	0	0	0
GSBRNA2T00090808001	BnaC01g23400D	1.84551	1.53957	2.60273	1.65886	0.970675	1.24398	1.13509	0.8851
GSBRNA2T00004118001	BnaA05g32760D	1.4233	2.11088	1.40732	1.46945	1.37399	1.23883	1.04677	1.02948
GSBRNA2T00014698001	BnaC03g75810D	0	0	0	0	0	0	0	0
GSBRNA2T00100516001	BnaC05g06660D	1.34998	1.02584	2.74857	1.22082	0	0	0.329829	0.095578
GSBRNA2T00097130001	BnaC02g17020D	3.17334	3.89132	2.8065	3.51958	1.73602	1.5731	1.99752	1.40699
GSBRNA2T00135694001	BnaA10g20160D	4.88465	4.88212	8.49096	8.71234	0.60315	0.437437	4.08916	5.08687
GSBRNA2T00102017001	BnaA07g27400D	0.124332	0.138644	1.54069	0.48101	0	0	1.74737	1.70017
GSBRNA2T00130704001	BnaC01g04950D	4.15935	3.95042	4.25706	4.19417	3.37913	2.93564	1.88248	2.48607
GSBRNA2T00040404001	BnaC02g36610D	11.2122	9.70516	11.8619	12.9647	0	0	0.358542	0.63239
GSBRNA2T00054266001	BnaA07g04450D	0	0.047873	0.038337	0.165195	0.080541	0	0.336979	0
GSBRNA2T00127296001	BnaC08g33830D	0	0.0123	0	0.210475	0	0.057479	0	0
GSBRNA2T00127133001	BnaC08g32460D	4.03895	3.79688	3.78514	4.61381	6.96873	7.37463	10.9735	11.7775
GSBRNA2T00057079001	BnaC08g41850D	2.67792	2.76431	3.00041	2.92794	1.60574	1.48928	1.43554	1.52293
GSBRNA2T00034824001	BnaA06g12500D	3.32019	3.66304	3.23023	4.20242	0.175921	0.067333	0.78153	0.7327
GSBRNA2T00097247001	BnaA08g29380D	0	0	0	0	0	0	0	0
GSBRNA2T00007981001	BnaAnng11820D	0	0	0	0	0	0	0	0
GSBRNA2T00004821001	BnaCnng21810D	0	0	0	0	0	0	0	0
GSBRNA2T00125868001	BnaC01g25180D	0	0	0	0	0	0	0	0
GSBRNA2T00104250001	BnaA02g20330D	0	0	0	0	0	0	0	0.077874
GSBRNA2T00138798001	BnaA03g22580D	0.179079	0.096713	0	0	0.292228	0	0.047023	0.059619
GSBRNA2T00027479001	BnaC03g74610D	30.9303	30.0609	17.9589	18.2994	54.7264	59.5095	78.6299	77.8888
GSBRNA2T00107547001	BnaC05g33950D	0	0	0	0	0	0	0	0
GSBRNA2T00126404001	BnaA04g03860D	0.795439	0.736619	1.28386	1.40435	0.029988	0.01104	0	0
GSBRNA2T00041957001	BnaA09g53920D	0	0.009004	0.04379	0.011627	0.035136	0	0	0
GSBRNA2T00075142001	BnaC01g00470D	0.046709	0	0	0	0	0	0	0
GSBRNA2T00068270001	BnaA04g14000D	0.606707	0.047431	0.179211	0.701019	0	0.079784	0.243419	0.822534
GSBRNA2T00007266001	BnaC08g48190D	0	0	0	0	0	0	0	0
GSBRNA2T00057709001	BnaCnng52900D	4.0604	3.37623	0.652984	0.905258	28.5597	24.0579	30.5718	32.9332
GSBRNA2T00078608001	BnaC02g01900D	2.13163	2.09242	2.48548	1.93892	2.39433	2.05292	1.80998	2.68376
GSBRNA2T00136641001	BnaC08g38860D	0	0	0	0	0	0	0	0
GSBRNA2T00008838001	BnaC05g08300D	2.81282	2.62826	4.16258	3.37448	2.99599	2.70037	7.53298	7.72355
Brassica_napus_newGene_1100	--	0.33907	0.167911	0.322746	0	0.148898	0	0.138327	0
GSBRNA2T00034267001	BnaC09g51990D	0.653633	0.367342	0.288533	0.291288	0	0	0	0
GSBRNA2T00140184001	BnaC03g04670D	27.2161	31.3953	32.9316	32.7316	11.6759	11.1333	11.6158	11.1275
GSBRNA2T00124741001	BnaA03g18750D	25.3073	26.4734	29.5221	29.6281	33.6422	36.8635	82.1503	70.5213
GSBRNA2T00078220001	BnaA09g42850D	0.216056	0.252982	0.291597	0.327744	0.036752	0	0.033048	0.051399
GSBRNA2T00071518001	BnaA03g53130D	0.060229	0.041481	0.106658	0.085388	0	0	0	0.034934
Brassica_napus_newGene_8307	--	0.655782	0.213961	0.378398	0.731455	1.30996	1.65574	0.837628	1.24146
GSBRNA2T00035749001	BnaC09g09320D	11.4828	7.67129	6.23023	14.1193	22.0016	21.1289	22.6049	7.3071
GSBRNA2T00031913001	BnaC05g03530D	0	0	0	0	0	0	0	0
GSBRNA2T00092275001	BnaC05g48840D	0.263918	0.934152	0.159372	0.352789	0.224052	0.125101	0	0.165443
GSBRNA2T00011656001	BnaA03g56970D	0.099561	0.7537	0.433586	0.187122	0.115218	0	0	0.174453
GSBRNA2T00046055001	BnaA02g33370D	193.949	194.206	127.405	138.926	24.283	23.1288	215.752	206.702
GSBRNA2T00059846001	BnaC03g41650D	0	0	0	0	0	0	0	0
GSBRNA2T00129397001	BnaA09g32960D	0.066152	0.077346	0.086985	0.088744	0.054095	0.123645	0	0.033035
GSBRNA2T00142476001	BnaC05g20180D	2.64664	2.77599	2.56867	2.49174	0.840345	1.07702	1.0866	1.19574
GSBRNA2T00005840001	BnaC08g08790D	0.174959	0	0	0	0	0	0.172511	0.046871
GSBRNA2T00073731001	BnaC02g12300D	0	0	0	0	0	0	0	0
GSBRNA2T00152455001	BnaC02g26690D	0	0	0	0	0	0	0	0
GSBRNA2T00145625001	BnaA09g22530D	33.998	31.8463	33.6155	37.5692	7.25694	9.0048	8.46131	9.76779
GSBRNA2T00027828001	BnaAnng40750D	1.28689	0.427704	0.777961	0.827355	1.82236	1.50504	0.896164	1.57343
GSBRNA2T00014608001	BnaAnng13410D	3.32396	3.00592	4.44706	3.39528	1.99421	2.51455	2.57333	2.22502
GSBRNA2T00060645001	BnaA01g35880D	12.2929	13.6104	13.85	11.513	7.40058	7.52072	6.35545	6.11193
GSBRNA2T00019854001	BnaCnng30820D	0	0.055915	0.429374	0.295761	0.11598	0.104805	0	0.102936
GSBRNA2T00119461001	BnaC05g18140D	0	0	0.116267	0	0	0	0	0
GSBRNA2T00065788001	BnaC01g09820D	11.1777	10.7515	9.37676	9.7604	1.97437	1.82025	0.890253	0.833881
Brassica_napus_newGene_4446	--	3.23837	2.3732	0.895121	0.578583	0.066666	0	0.188219	0.124846
GSBRNA2T00155050001	BnaA03g38530D	4.97632	4.48466	4.81709	5.8112	2.44041	2.98293	6.91775	3.56378
GSBRNA2T00045781001	BnaCnng46920D	3.47487	3.90321	4.3185	3.97745	4.65906	5.53211	6.57881	5.18501
GSBRNA2T00050072001	BnaC03g57660D	8.55812	8.74245	12.8788	10.9483	0	0.192692	0.693104	0.577832
GSBRNA2T00140072001	BnaC08g07790D	0.8115	0.990295	0.846019	2.04525	0.360263	0.418608	0.776761	0.656047
GSBRNA2T00106019001	BnaC06g17870D	2.94002	2.37427	2.64426	2.40922	1.45742	0.81363	1.05714	0.880047
GSBRNA2T00150293001	BnaA10g02460D	1.87182	1.80285	2.21714	1.95569	1.57547	1.41245	1.68124	2.15502
GSBRNA2T00056431001	BnaA09g11150D	0	0	0	0	0	0	0	0
GSBRNA2T00089292001	BnaA09g26990D	6.8927	4.61636	7.8263	6.93245	0.107489	0.248987	0.115861	0
GSBRNA2T00064256001	BnaCnng08330D	3.82712	4.58885	4.01291	4.44353	2.36823	2.49682	1.049	1.02357
GSBRNA2T00011073001	BnaA01g25520D	4.31216	4.91312	5.39869	5.13456	0	1.10984	3.84684	1.58571
GSBRNA2T00014156001	BnaCnng27080D	0	0	0	0	0	0	0	0
GSBRNA2T00126388001	BnaA04g03780D	0	0	0	0	0	0	0	0
GSBRNA2T00108054001	BnaC09g24220D	0	0	0	0	0	0	0	0
GSBRNA2T00070512001	BnaC07g15730D	6.5015	5.93881	7.68496	7.86305	3.47111	3.06364	4.60624	4.57102
GSBRNA2T00080503001	BnaA04g10080D	0	0	0	0	0	0	0	0
GSBRNA2T00054748001	BnaA06g35740D	0	0	0	0	0	0	0	0
GSBRNA2T00049493001	BnaA09g39930D	4.05259	4.08172	5.05453	4.42466	1.28343	1.34736	1.43372	1.21045
GSBRNA2T00099925001	BnaC07g44490D	16.0682	14.2274	32.5118	33.1318	0.406352	0.403589	6.95839	5.31032
GSBRNA2T00154626001	BnaC07g40560D	0	0	0	0	0.078246	0	0	0
GSBRNA2T00136732001	BnaC08g38090D	0	0	0	0	0	0	0	0
GSBRNA2T00150860001	BnaA08g16980D	23.8536	23.5525	20.995	21.6003	10.4795	12.2235	13.4901	12.431
GSBRNA2T00092644001	BnaA09g55310D	34.5579	33.0364	37.2834	39.7259	18.887	19.7019	12.0969	11.9563
GSBRNA2T00155176001	BnaC04g46750D	13.9145	13.2646	13.8726	14.1595	3.71811	4.17038	6.15384	4.3551
GSBRNA2T00067366001	BnaC09g21720D	4.59175	5.00266	5.14406	3.97117	1.81995	2.05718	0.921724	1.42415
GSBRNA2T00148218001	BnaC04g16320D	2.77829	2.40897	2.82491	3.61318	4.03318	3.54532	2.53947	3.38473
GSBRNA2T00041514001	BnaC06g26300D	99.2552	96.8542	77.3453	82.8955	415.128	399.643	206.646	215.283
GSBRNA2T00157800001	BnaC09g22870D	0	0	0	0	0	0	0	0
GSBRNA2T00140319001	BnaC03g05750D	0	0	0.035781	0	0	0	0	0
GSBRNA2T00017488001	BnaA04g29100D	0.446623	0.756103	0.701878	0.733926	0.016382	0	0	0
GSBRNA2T00048133001	BnaCnng48560D	9.60055	8.16815	4.84109	5.17525	0	0.031818	0.075717	0
GSBRNA2T00139395001	BnaC07g24300D	2.00741	1.47675	0.624877	0.901718	0.069689	0	0	0.042874
GSBRNA2T00036194001	BnaCnng40050D	0.188887	0.304916	0.21073	0.120319	0.359652	0.524306	0.230291	0.172477
GSBRNA2T00023647001	BnaA03g58510D	4.77543	4.71726	4.73821	4.54952	10.4325	11.3105	11.1313	8.65514
GSBRNA2T00124675001	BnaC06g14750D	2.78944	2.75196	2.6831	2.63874	0.08666	0.097842	0.346171	0.24593
GSBRNA2T00122814001	BnaA10g04300D	2.07169	2.5237	2.08622	2.02952	0.569556	0.513399	0.722022	0.670033
GSBRNA2T00010053001	BnaA01g28200D	6.06945	7.11046	0.535533	0.620844	173.41	174.655	123.942	127.312
GSBRNA2T00068520001	BnaA04g11190D	45.8234	49.5056	50.475	52.5506	7.04432	7.47069	7.13553	5.82727
GSBRNA2T00086706001	BnaA03g12150D	0	0	0	0	0	0.035011	0	0.075082
Brassica_napus_newGene_4117	--	1.67362	1.19606	1.32361	1.05536	0.292234	0.352484	0.461718	0.627401
GSBRNA2T00019176001	BnaC05g24050D	21.3503	20.9135	22.9456	21.4488	11.4491	11.5428	10.3666	11.8231
GSBRNA2T00137375001	BnaA03g35490D	0	0	0	0	0.15059	0.073826	0.035303	0
GSBRNA2T00011055001	BnaC09g51890D	0.588191	0.105824	0.265533	0.64627	0	0	0	0
GSBRNA2T00038541001	BnaA05g31480D	5.7526	4.12324	4.56844	5.2961	0.146898	0.720647	1.1613	1.28999
GSBRNA2T00098998001	BnaA07g18430D	0.097859	0.116852	0.048133	0	0.147386	0.326955	0.48878	0.544551
GSBRNA2T00016983001	BnaA05g34450D	2.60872	2.10569	2.92812	2.05028	0.524339	0.681281	0.352138	0.687194
GSBRNA2T00010959001	BnaAnng35970D	0	0.037303	0	0	0	0	0	0
GSBRNA2T00084314001	BnaC02g25180D	7.24236	7.76316	8.54715	7.60187	1.06995	1.54637	1.35208	1.56521
GSBRNA2T00098540001	BnaA07g14790D	0	0	0	0	0	0	0	0
GSBRNA2T00119932001	BnaC03g29350D	20.2834	20.9566	18.0861	16.1607	13.0676	12.1347	12.9292	11.8303
GSBRNA2T00038309001	BnaA09g28300D	0	0	0	0	0	0	0	0
GSBRNA2T00006294001	BnaC01g20330D	8.93236	7.85553	8.59722	9.10041	4.15609	4.19164	4.44431	4.19985
GSBRNA2T00045643001	BnaCnng46680D	0	0	0	0	0	0	0	0
GSBRNA2T00123083001	BnaC01g09300D	0.057698	0	0	0	0	0	0	0
GSBRNA2T00003547001	BnaC03g77350D	0	0	0	0	0	0	0	0
GSBRNA2T00148943001	BnaA03g07860D	0.171878	0.296445	0.313469	0.186288	0.074808	0.136526	0.055966	0.160152
GSBRNA2T00104833001	BnaA05g24660D	2.73058	3.6788	2.90637	2.5369	1.79896	1.87572	1.24478	1.17476
GSBRNA2T00101308001	BnaC01g33940D	0	0	0	0	0	0	0	0
GSBRNA2T00064078001	BnaC01g37500D	3.84578	2.82739	1.92703	2.26669	2.29057	2.76437	3.7965	4.17027
GSBRNA2T00137609001	BnaA03g33510D	0	0	0	0	6.19568	6.69304	8.6247	9.14363
GSBRNA2T00024049001	BnaC04g43960D	0.192705	0.198857	0.282992	0.180574	0	0	0	0
GSBRNA2T00150625001	BnaA08g18770D	5.71061	5.91614	5.21624	4.67003	7.08643	7.27502	3.30902	4.27195
GSBRNA2T00124185001	BnaC05g26580D	0	0	0	0	0	0	0	0
GSBRNA2T00078114001	BnaA06g32340D	0	0	0	0	0	0	0	0
GSBRNA2T00008266001	BnaCnng23990D	0	0	0	0	0	0	0	0
GSBRNA2T00047573001	BnaA07g03100D	0	0	0	0	0	0	0	0
GSBRNA2T00081476001	BnaAnng28920D	0	0	0	0	0	0	0	0
GSBRNA2T00099374001	BnaA07g21670D	33.5952	33.0788	36.5223	35.2907	9.10502	9.59855	20.9855	26.4762
GSBRNA2T00126773001	BnaA08g10170D	65.5672	65.3726	59.1767	67.9912	85.6125	78.0857	113.578	87.7253
GSBRNA2T00051551001	BnaCnng06820D	0	0	0	0	0	0	0	0
GSBRNA2T00074661001	BnaA08g00350D	0.379561	0.736275	0.052248	0.095568	0	0	0	0
GSBRNA2T00108019001	BnaC09g24320D	0	0	0	0	0	0	0	0
GSBRNA2T00111745001	BnaA03g30370D	0	0	0	0	0	0	0	0
GSBRNA2T00104329001	BnaA02g20780D	16.5445	16.5054	17.8517	14.053	23.0611	23.4461	22.9628	23.4685
GSBRNA2T00028881001	BnaC02g39620D	0	0	0	0	0	0	0	0
GSBRNA2T00005286001	BnaCnng69300D	0	0	0.088541	0	0	0	0	0
GSBRNA2T00010535001	BnaA07g36420D	2.25811	2.73462	2.6114	1.99688	0.151203	0.143769	0.532058	0.480877
GSBRNA2T00100777001	BnaC09g16790D	6.76252	7.68605	6.77358	5.8753	2.8991	2.82004	3.02306	3.18244
GSBRNA2T00033853001	BnaA02g34960D	10.3168	9.3651	9.42491	10.3297	4.71416	4.40464	6.15351	5.1215
GSBRNA2T00145442001	BnaA09g21260D	0.71988	0.661832	0.39947	0.6053	0.06156	0.210186	0.132786	0.281769
GSBRNA2T00054214001	BnaC05g12150D	0	0	0	0	0	0	0	0
GSBRNA2T00051534001	BnaCnng06680D	9.13182	10.4444	10.4665	10.1421	2.60486	1.95476	7.04504	5.59893
GSBRNA2T00061411001	BnaA06g20300D	0	0	0	0	0	0	0	0
GSBRNA2T00047033001	BnaC04g24270D	0	0	0	0	0	0	0	0
GSBRNA2T00006119001	BnaC04g04350D	0.054216	0	0.079287	0.06212	0.417634	0.30586	1.5191	1.32865
GSBRNA2T00145829001	BnaC03g52580D	0	0	0	0	0	0	0	0
GSBRNA2T00074278001	BnaA09g28520D	0	0	0	0	0	0	0	0
GSBRNA2T00115951001	BnaC09g10070D	0	0	0	0	0	0	0	0
GSBRNA2T00107678001	BnaC01g11820D	2.6866	3.45529	7.92089	6.97948	0.038074	0.0268	0.076974	0.106838
GSBRNA2T00018635001	BnaC01g38890D	0	0	0	0	0	0	0	0
GSBRNA2T00094980001	BnaA08g03810D	3.05975	2.56995	1.69419	1.18964	0.903932	1.34762	3.57032	2.31275
GSBRNA2T00083001001	BnaC03g71990D	12.8058	11.765	11.728	11.5502	4.72366	4.97537	5.75575	5.22455
GSBRNA2T00150363001	BnaA10g01970D	0	0	0.442701	0	0.206809	0.317369	0	0
GSBRNA2T00102621001	BnaA07g30620D	0.901796	0.813534	1.01676	0.474082	0	0	0.071717	0.083655
GSBRNA2T00047344001	BnaC08g15090D	4.67506	4.932	4.31567	4.66689	1.8664	1.7347	3.57856	4.49626
GSBRNA2T00097948001	BnaAnng33290D	7.81517	9.61414	9.25561	9.0616	0.06758	0.077105	0	0.02067
GSBRNA2T00047266001	BnaC03g47190D	9.33402	8.90895	6.92248	6.83986	0	0	0	0
GSBRNA2T00096878001	BnaA10g06320D	0	0	0	0	0	0	0	0
GSBRNA2T00070948001	BnaA09g17140D	5.47285	5.25971	4.40706	4.7696	4.54738	4.5524	7.40536	6.05867
GSBRNA2T00157049001	BnaC07g37660D	0.224757	0.257059	0.343509	0.383259	0.217032	0.036696	0.284713	0.114242
GSBRNA2T00027216001	BnaA08g15400D	7.60657	6.97744	9.12526	10.3579	30.3587	29.3398	12.1173	11.2148
GSBRNA2T00027410001	BnaC02g48700D	0.40575	0.358651	0.545726	0.694564	0.950065	1.3638	0.966363	0.96087
GSBRNA2T00147827001	BnaC06g37640D	6.60832	6.67714	7.35022	6.67276	5.38577	4.26195	5.74614	5.54063
Brassica_napus_newGene_11676	--	1.70467	1.87006	1.94632	1.65248	0.441176	1.15003	0.935641	1.04034
GSBRNA2T00095912001	BnaC01g43540D	44.7942	47.1631	68.8043	64.26	14.0391	11.7343	163.721	175.671
GSBRNA2T00009585001	BnaA09g04780D	1.35487	1.23377	1.45826	1.25917	0.376882	0.216853	0.593105	0.799386
GSBRNA2T00132318001	BnaC03g18940D	5.75549	6.06404	5.7044	5.62554	6.19431	5.59268	4.59169	4.57088
GSBRNA2T00013801001	BnaC06g43110D	0	0	0	0	0.07094	0.201326	0.200773	0
GSBRNA2T00049802001	BnaC06g30820D	0	0.873382	0	0	0	0	0	0
GSBRNA2T00059364001	BnaC09g37760D	1.68058	1.9144	0.560517	1.55796	0	0.039552	0	0
GSBRNA2T00101825001	BnaC05g36150D	43.2472	48.7773	52.5208	52.4325	9.86788	10.1595	14.7023	13.8662
GSBRNA2T00110220001	BnaA10g07710D	0	0	0.080964	0.188804	0	0	0	0
GSBRNA2T00130746001	BnaC01g04570D	9.25602	7.82018	10.8614	11.8603	8.47315	12.328	15.1738	12.2173
GSBRNA2T00033751001	BnaA09g53110D	0.878404	0.873628	1.28686	0.927209	0.120366	0.151674	0.155698	0.150498
GSBRNA2T00002391001	BnaC03g30770D	0	0.037596	0	0	0	0	0	0
GSBRNA2T00015935001	BnaC03g26950D	0	0	0	0	0	0	0	0
GSBRNA2T00016831001	BnaA04g29190D	46.7877	48.3073	27.3785	27.6499	0.437618	0.852169	0.86363	1.03774
GSBRNA2T00140854001	BnaC03g10250D	0	0	0	0	0	0	0	0
GSBRNA2T00040820001	BnaC06g42050D	3.86836	2.99048	2.92422	2.65436	1.50277	1.39955	3.50941	2.55124
GSBRNA2T00118285001	BnaC04g18340D	19.9399	15.8298	47.2487	47.0485	13.7187	16.5682	49.0213	54.9914
GSBRNA2T00142559001	BnaC07g08180D	15.8228	12.7976	17.3976	16.1785	13.2424	13.2341	42.5028	35.2614
GSBRNA2T00103665001	BnaC06g36240D	0	0.073486	0.353935	0.394488	0	0	0	0
GSBRNA2T00004904001	BnaC04g55480D	12.6359	11.2484	9.1518	7.10035	3.45903	4.09858	4.9692	4.56743
GSBRNA2T00027772001	BnaC03g75560D	0	0	0	0	0	0	0	0
GSBRNA2T00054894001	BnaC06g29550D	0.109437	0	0	0	0	0	0.023426	0
GSBRNA2T00129391001	BnaA09g32910D	15.9229	16.3857	12.2174	9.16721	1.42697	1.43985	0.711645	0.921459
GSBRNA2T00031900001	BnaC05g03410D	21.6948	19.9297	18.0719	17.9374	1.74399	1.6765	1.77629	2.14829
GSBRNA2T00059518001	BnaA05g29880D	0.713095	1.00863	0.608798	0.817124	0.121368	0.18499	0.155807	0.120137
GSBRNA2T00117797001	BnaA09g19110D	0	0	0	0	0	0	0	0.033388
GSBRNA2T00154076001	BnaA10g13820D	62.2757	61.778	73.4951	69.6691	11.3325	11.709	17.1283	17.2617
GSBRNA2T00110589001	BnaC03g37170D	0	0	0	0	0	0	0	0
GSBRNA2T00072985001	BnaCnng10360D	3.77731	3.65455	4.04507	3.80264	1.76201	1.79756	1.28879	1.40009
GSBRNA2T00100011001	BnaC07g45050D	12.0818	12.7896	16.1677	14.0861	8.8906	7.6542	8.1778	10.0883
GSBRNA2T00087660001	BnaC03g69130D	0	0	0	0	0	0	0	0
GSBRNA2T00153525001	BnaC03g32000D	6.41899	6.55514	6.81105	6.92054	1.23511	1.50813	1.99512	2.06568
GSBRNA2T00076052001	BnaC05g36880D	0	0	0	0	0	0	0	0
GSBRNA2T00002372001	BnaC03g30640D	2.53756	2.74736	1.92655	3.06555	1.42891	1.65707	2.13864	1.72934
GSBRNA2T00067685001	BnaA03g58750D	53.0856	52.7645	28.1513	30.5988	0.67696	0.281079	1.56819	0.652519
GSBRNA2T00019540001	BnaCnng74080D	9.59728	4.38781	4.1391	2.96359	8.50237	8.55538	3.74193	9.54062
GSBRNA2T00022566001	BnaC04g51910D	20.4383	18.6985	17.1188	18.1598	1.8337	1.98222	2.73958	3.53006
GSBRNA2T00046103001	BnaA02g33690D	0	0	0	0	0	0	0	0
GSBRNA2T00114819001	BnaC02g07550D	0	0	0	0	0	0	0	0
GSBRNA2T00049416001	BnaA09g39300D	9.63467	10.0609	8.0409	9.53331	1.34934	0.978662	1.77874	2.09843
GSBRNA2T00014073001	BnaC06g41550D	0	0	0	0	0	0	0	0
GSBRNA2T00143751001	BnaC06g22150D	0	0	0	0	0	0	0	0
GSBRNA2T00093727001	BnaA02g19400D	5.71213	6.27043	5.81157	6.68865	1.61798	1.72324	1.82589	2.98417
GSBRNA2T00022060001	BnaC04g49740D	12.5928	12.6738	11.0114	11.7553	7.44258	8.01886	8.06236	6.71094
GSBRNA2T00153651001	BnaC03g32990D	0	0	0.182692	0	0	0.22135	0	0
GSBRNA2T00136293001	BnaA10g25240D	1.57461	2.02328	1.57918	1.44736	3.24447	2.82005	0.902238	0.636648
GSBRNA2T00099241001	BnaA07g20620D	107.313	112.387	78.0519	78.702	51.3727	52.2572	37.5368	34.343
GSBRNA2T00100397001	BnaC05g07500D	0.387207	0.282977	0.466253	0.317417	0.740903	0.883214	0.429595	0.668124
GSBRNA2T00122021001	BnaA09g36430D	4.11856	3.87855	4.77921	4.18131	2.01762	1.56818	3.60511	2.0397
GSBRNA2T00130785001	BnaC01g04230D	10.8147	11.068	15.7605	15.4338	28.7742	26.9905	19.3451	23.8389
GSBRNA2T00055682001	BnaCnng52220D	61.3768	62.2723	76.7538	78.8511	0	0	0	0
GSBRNA2T00059983001	BnaA08g19100D	25.3179	25.5584	25.7254	26.2309	3.73647	2.8458	6.79317	6.38646
GSBRNA2T00099352001	BnaA07g21500D	15.2758	15.4597	15.3834	16.4643	8.89819	8.34825	8.88163	11.2302
GSBRNA2T00155566001	BnaC08g30320D	18.3958	18.7424	16.1232	16.6758	1.80113	1.40244	1.95221	2.44571
GSBRNA2T00008312001	BnaC03g76900D	6.94022	6.42722	6.62217	6.81234	4.60631	4.63956	5.0889	6.34168
GSBRNA2T00082781001	BnaA02g14150D	1.36068	1.62461	1.13508	1.22465	0.97755	0.903586	1.0703	1.00367
GSBRNA2T00012083001	BnaAnng12980D	0.76641	0.55101	0.396749	0.754855	0.847377	0.718656	1.19722	1.0497
GSBRNA2T00109276001	BnaC08g23190D	3.99765	4.02076	3.70677	3.32213	2.64928	1.98067	2.52764	2.06423
GSBRNA2T00076884001	BnaC02g16770D	0	0	0	0	0	0	0	0
GSBRNA2T00061568001	BnaC08g08340D	0	0	0	0	0	0	0	0
GSBRNA2T00000874001	BnaC08g11120D	6.61973	6.81128	6.0639	6.97083	3.41305	3.84662	3.20553	4.02664
GSBRNA2T00111016001	BnaC05g42030D	43.1219	42.8142	34.7813	39.2765	18.6421	17.1643	10.0048	13.4234
GSBRNA2T00077880001	BnaC02g23530D	0.222866	0.316321	0.248778	0.274721	0.198066	0.051983	0.339839	0.152729
GSBRNA2T00122790001	BnaC02g13550D	0	0	0	0	0	0	0	0
Brassica_napus_newGene_6192	--	7.77977	7.44015	13.8536	7.23256	6.26254	3.218	1.39541	3.20541
GSBRNA2T00146060001	BnaC09g04610D	3.56563	3.64854	4.01226	3.81735	0	0	0	0
GSBRNA2T00105195001	BnaC04g40760D	49.7402	52.9272	99.3767	97.5899	7.15433	6.81946	54.7192	56.0802
GSBRNA2T00104225001	BnaC09g44020D	23.4326	23.5943	28.5489	28.1206	0.535819	1.04324	1.943	0.746164
GSBRNA2T00081602001	BnaA06g33830D	13.5636	14.4533	15.6231	13.0155	4.9348	4.31469	4.06102	4.82912
GSBRNA2T00074023001	BnaC04g00900D	18.6484	18.0183	19.8199	23.0585	1.35875	1.53027	2.79454	2.00154
GSBRNA2T00132454001	BnaC03g19960D	69.649	76.3459	75.7495	72.4908	16.3487	18.1987	26.4374	19.8729
GSBRNA2T00146285001	BnaA07g35550D	0.985713	0.672109	0.478198	0.694025	0.498138	0.486553	0.270152	0.226288
GSBRNA2T00012517001	BnaC04g05990D	2.12603	1.66975	2.29265	2.36496	0.581458	1.09823	2.40761	0.882014
GSBRNA2T00133303001	BnaC09g34460D	0	0	0	0	0	0	0	0
GSBRNA2T00092389001	BnaC09g52100D	0	0	0	0	0	0	0	0
GSBRNA2T00070880001	BnaA09g17620D	0	0	0	0	0.021446	0.097712	0	0
GSBRNA2T00078617001	BnaC02g01960D	0	0	0	0.02268	1.51633	1.58515	4.12049	4.67204
GSBRNA2T00090627001	BnaA09g29180D	0	0	0	0	0	0	0	0
GSBRNA2T00028362001	BnaA03g55740D	3.4255	4.05771	3.31552	3.7466	2.91434	2.78627	4.82517	3.66135
GSBRNA2T00128954001	BnaC03g53770D	0	0	0	0	0	0	0	0
GSBRNA2T00127201001	BnaC08g33030D	0	0	0	0	0	0	0	0
GSBRNA2T00098693001	BnaA07g16000D	2.0642	2.05205	1.32786	1.53504	0.053463	0.060898	0.111962	0.065299
GSBRNA2T00113728001	BnaA09g26150D	20.8949	22.2986	13.1822	12.4584	0	0	0.084663	0.034449
GSBRNA2T00072723001	BnaA01g12450D	15.3934	14.1407	17.3601	16.1939	4.92093	3.66952	4.77691	4.67569
GSBRNA2T00107802001	BnaC01g10920D	0.412924	0.936244	0.291253	0.179991	0	0	0	0
GSBRNA2T00125891001	BnaC01g25300D	2.98569	2.17875	1.98519	1.0072	0.90115	1.12529	0.017825	0.554012
GSBRNA2T00041342001	BnaCnng05910D	13.5867	13.0954	14.3528	16.3702	4.05658	4.55544	6.20816	6.62429
GSBRNA2T00150433001	BnaA10g01340D	0	0	0	0	0	0	0	0
GSBRNA2T00103344001	BnaC06g33690D	0	0	0	0	0	0	0	0
GSBRNA2T00058892001	BnaC05g27070D	0.428876	0.35278	0.248168	0.308713	0	0	0	0
GSBRNA2T00020162001	BnaCnng74360D	0.775451	1.17532	1.26174	1.3073	0.578447	0.131225	0.307152	0.38902
GSBRNA2T00050863001	BnaC06g16010D	0	0	0	0	0.07542	0.157498	0.026324	0.076764
GSBRNA2T00115249001	BnaC04g25250D	0	0	0	0	0	0	0	0
GSBRNA2T00113746001	BnaA09g26070D	0.125105	0	0	0.076654	0	0	0	0.066373
GSBRNA2T00023116001	BnaAnng39600D	41.8939	48.6281	66.2357	57.7225	0	0	0	0
GSBRNA2T00044763001	BnaA03g49950D	0	0	0	0	0	0	0	0
GSBRNA2T00084836001	BnaA02g22580D	19.7829	17.7202	18.7365	18.3971	25.7166	24.7229	12.0669	13.0633
GSBRNA2T00066219001	BnaA05g12810D	0	0	0	0	0	0	0	0
GSBRNA2T00156774001	BnaC04g21040D	2.92815	3.54526	2.6642	2.97772	0.943645	1.01948	1.48142	1.47917
GSBRNA2T00137026001	BnaC08g35590D	0	0	0	0	0	0	0	0
GSBRNA2T00007346001	BnaCnng22650D	0	0	0	0	0	0	0	0
GSBRNA2T00128355001	BnaA07g06240D	30.8589	30.0377	17.3065	14.3571	4.59269	4.9916	1.2338	1.23024
GSBRNA2T00122284001	BnaA09g48520D	0	0	0	0	0	0	0	0
GSBRNA2T00094211001	BnaC08g12110D	2.96663	3.19504	2.91262	2.5188	1.60387	1.74423	1.79488	2.14915
GSBRNA2T00058502001	BnaC03g61820D	0.084721	0.189397	0.14209	0.077901	0	0	0	0
Brassica_napus_newGene_8170	--	3.47487	2.99849	2.8924	3.56301	0	0	0.107154	0.234356
GSBRNA2T00046792001	BnaCnng47660D	0	0	0	0	0	0	0	0
GSBRNA2T00046233001	BnaC07g16990D	0	0	0	0	0	0	0	0
GSBRNA2T00044567001	BnaC05g09880D	429.685	455.762	709.306	730.763	108.235	121.16	430.793	416.119
GSBRNA2T00003259001	BnaA04g28470D	0	0	0	0	0	0	0	0
GSBRNA2T00014137001	BnaA09g52760D	2.12145	2.86255	2.61363	4.87133	0	0	0	0
GSBRNA2T00062409001	BnaA07g04020D	12.5394	11.9352	12.7185	13.153	7.03693	6.53525	8.41145	8.79093
GSBRNA2T00113656001	BnaA03g39300D	5.84939	6.59965	4.58355	5.3129	3.28917	3.28554	3.62176	4.04406
GSBRNA2T00137469001	BnaA03g34720D	2.8037	3.06843	2.62019	2.62084	0.077979	0.157315	0.451956	0.694192
GSBRNA2T00118636001	BnaA07g13040D	12.8416	12.6352	13.196	13.0598	6.72881	6.77864	5.74868	7.27344
GSBRNA2T00008228001	BnaCnng23890D	7.58123	7.95197	8.93484	8.69607	3.78161	3.20411	2.00571	3.20885
GSBRNA2T00042387001	BnaA06g38940D	0.277558	0	0	0	0.331234	0	0	0
GSBRNA2T00141060001	BnaC03g11860D	0	0.058312	0	0.024004	0.517165	0.355288	0.698326	0.583729
GSBRNA2T00143958001	BnaC03g55390D	0	0	0	0	0	0	0	0
GSBRNA2T00076367001	BnaC03g58910D	0	0	0	0	0.118832	0	0.062007	0
GSBRNA2T00005877001	BnaC08g08620D	0	0	0	0	0	0	0	0
GSBRNA2T00001885001	BnaA06g34860D	268.75	268.538	244.68	246.738	5.74231	5.61157	39.3598	35.5692
GSBRNA2T00039511001	BnaCnng42370D	0	0	0	0	0	0	0	0
GSBRNA2T00074049001	BnaC04g01130D	3.7283	4.07142	4.45217	4.464	2.74864	2.63123	2.97648	4.31692
GSBRNA2T00109855001	BnaA06g21820D	0.130359	0.15277	0.104817	0	0	0	0	0
GSBRNA2T00119491001	BnaC05g17940D	0	0.034276	0.03425	0.095948	0.126035	0.023414	0	0.029927
GSBRNA2T00151660001	BnaA03g26040D	1.12257	1.4356	1.35419	1.58994	20.0999	19.3317	12.8472	14.6452
GSBRNA2T00018275001	BnaC09g00520D	0.717581	0.606492	0.13692	0.362308	7.5009	8.72015	16.21	13.5441
GSBRNA2T00135449001	BnaA10g18140D	0.189369	0.065795	0.104155	0.347415	0	0	0	0
GSBRNA2T00059746001	BnaAnng23800D	0	0	0	0	0	0	0	0
GSBRNA2T00010713001	BnaA02g07010D	2.99117	3.51476	3.54159	3.38604	3.18329	3.39946	3.29598	3.80473
GSBRNA2T00103949001	BnaC09g46250D	15.8382	15.991	17.6736	17.0237	5.33659	5.3822	4.6802	5.11549
GSBRNA2T00103146001	BnaC06g32150D	8.12271	7.80968	7.64637	7.90888	1.04779	1.12153	1.12406	1.59177
GSBRNA2T00127064001	BnaC08g31940D	1.63699	1.4365	2.13085	1.88447	3.23821	3.50885	2.84925	3.01011
GSBRNA2T00120396001	BnaA02g32150D	3.71639	3.98489	2.52105	2.86293	0	0.269464	0.273167	0.117098
GSBRNA2T00019297001	BnaC08g42620D	8.47051	7.27935	4.73864	5.22738	2.01416	1.42927	5.96282	4.36854
GSBRNA2T00129050001	BnaC03g53530D	0	0	0.292531	0	0	0	0	0
GSBRNA2T00062418001	BnaCnng07630D	0	0	0	0	0	0	0	0
GSBRNA2T00080373001	BnaA01g21760D	0	0	0	0	0	0	0	0
GSBRNA2T00119007001	BnaC09g25190D	0.203484	0.237855	2.17628	1.60827	16.9467	19.6923	10.1843	9.82759
GSBRNA2T00138876001	BnaA03g21890D	0.821364	1.04339	1.33087	1.21145	0.520046	0.51994	0.984091	0.912085
GSBRNA2T00057462001	BnaA09g48210D	0	0	0.107273	0	0	0.183566	0	0
Brassica_napus_newGene_1955	--	0	0.155412	0.156813	0.16143	0.336226	0.328081	0.586498	0
Brassica_napus_newGene_10332	--	20.4922	57.4384	36.1905	50.2555	0	0	0	0
GSBRNA2T00112985001	BnaC06g28650D	10.7132	10.0153	12.2454	10.8812	5.12475	6.75953	9.07475	6.90899
GSBRNA2T00088141001	BnaCnng63730D	0	0	0	0	0.158712	0.358471	0	0
GSBRNA2T00111458001	BnaC05g24540D	12.8723	14.4125	11.778	9.98114	8.6624	9.18523	7.21785	8.32421
GSBRNA2T00112250001	BnaA07g10810D	0	0	0	0	0	0	0	0
GSBRNA2T00070889001	BnaA09g17550D	2.81067	3.37064	2.72841	2.97529	1.08705	0.910096	0.396151	0.904249
GSBRNA2T00003891001	BnaAnng33850D	0	0	0	0	0	0	0	0
GSBRNA2T00140974001	BnaC03g11150D	3.2951	3.41384	1.81759	2.68271	0.094962	0.155279	0.545927	0.345633
GSBRNA2T00120029001	BnaC05g45830D	7.52287	7.14771	8.00615	7.90006	2.39139	2.25121	1.07035	2.29098
GSBRNA2T00151529001	BnaA03g24990D	0	0	0	0	0	0	0	0
GSBRNA2T00092147001	BnaUnng03400D	0	0	0	0	0	0	0	0
GSBRNA2T00032503001	BnaC03g70690D	152.689	150.053	197.826	199.483	18.6447	21.2236	102.318	83.0785
GSBRNA2T00087797001	BnaCnng63580D	0	0	0	0	0.056705	0	0.148437	0.27657
GSBRNA2T00119263001	BnaC05g17010D	2.59436	1.81322	2.23239	2.19666	0.87103	0.907904	1.12881	0.632982
GSBRNA2T00017626001	BnaAnng38230D	0.734191	0.211338	0.419081	0.382204	1.33648	1.60432	0.81157	0.952706
Brassica_napus_newGene_2972	--	3.93037	3.85953	2.8459	3.10511	0.639885	0.51494	0.930649	0.599816
GSBRNA2T00092182001	BnaA02g28140D	0.574329	0.37775	0.212898	0.091227	0.152354	0.185405	0.097035	0.312787
GSBRNA2T00028391001	BnaCnng35940D	5.34374	5.21352	6.36285	6.51234	2.34115	1.59071	1.59756	1.44317
GSBRNA2T00071317001	BnaC06g14360D	58.9268	62.454	88.2723	84.8687	21.1468	20.7331	58.2306	68.4542
GSBRNA2T00062314001	BnaC06g06600D	1.27541	1.50543	0.644129	0.48337	7.0709	7.50317	6.43109	7.22712
GSBRNA2T00097957001	BnaAnng33310D	0.060061	0	0	0	0	0	0	0
GSBRNA2T00031458001	BnaC07g33020D	0	0	0	0	0.13486	0.653111	0.070606	0.041179
GSBRNA2T00114262001	BnaA04g09780D	0.745744	0.940134	1.34879	0.707567	0.125553	0.161814	0.224466	0.41851
Brassica_napus_newGene_6313	--	0.540625	0.807164	0.735164	0.32568	3.97009	4.22525	3.80915	2.79097
GSBRNA2T00022654001	BnaCnng75200D	0	0	0	0	0	0	0	0
GSBRNA2T00086811001	BnaA08g05360D	0	0	0	0	0	0	0.439503	0
GSBRNA2T00104090001	BnaC09g45170D	0.412145	0.202136	0.111246	0.195934	0	0	0	0
GSBRNA2T00033062001	BnaC03g69620D	2.39044	2.17111	2.12649	2.30078	0.192069	0.172622	0.893669	0.851743
GSBRNA2T00038812001	BnaCnng05070D	3.40994	3.51066	2.44572	2.19316	0.111003	0.180282	0.089273	0.210624
GSBRNA2T00112084001	BnaA03g27560D	0.010609	0	0.025764	0	0	0	0	0.041827
Brassica_napus_newGene_12554	--	13.2222	12.5834	15.3352	15.6957	3.69453	3.77536	5.68446	6.83005
GSBRNA2T00120836001	BnaC07g00350D	6.29912	5.7602	7.225	7.24445	1.74479	1.48255	1.90522	2.12185
GSBRNA2T00119516001	BnaC05g17750D	0.026017	0	0	0	0	0	0	0
GSBRNA2T00101713001	BnaC05g35340D	15.6424	18.1056	15.3639	12.9803	17.2159	20.0039	18.831	18.5785
GSBRNA2T00028203001	BnaCnng77330D	7.67395	8.24502	6.53427	7.37836	6.8861	7.42898	8.31992	8.2413
GSBRNA2T00063686001	BnaA09g08260D	2.91379	2.6372	2.78134	2.58924	2.21381	2.13553	2.13762	2.62832
GSBRNA2T00063636001	BnaAnng24330D	1.6641	1.81159	1.68619	0	0.257932	0.303698	0.556754	0.669546
GSBRNA2T00145271001	BnaC08g00850D	0	0	0	0	0	0	0	0
GSBRNA2T00150212001	BnaA10g03100D	17.6252	16.0208	17.9172	17.4253	11.3616	11.2755	9.88494	10.1934
GSBRNA2T00119631001	BnaAnng00920D	5.05129	4.96187	2.05179	1.58326	0	0	0.373436	0.392271
Brassica_napus_newGene_2179	--	2.38417	2.55411	2.25601	2.29252	0.091302	0.118328	0.923502	0.271703
GSBRNA2T00032036001	BnaC05g04570D	0	0	0	0	0	0	0	0
Brassica_napus_newGene_2214	--	0	0.124885	0	0	0.535776	0.968786	0.198003	0.141655
GSBRNA2T00024899001	BnaCnng33440D	4.65963	4.72999	4.76078	5.0703	1.91271	2.12199	1.99089	2.00076
GSBRNA2T00153821001	BnaA05g22830D	0	0	0	0	0	0	0	0
GSBRNA2T00140197001	BnaC03g04760D	0.323188	0.271305	0.041222	0.057561	0.083674	0.19735	0.045314	0.14236
GSBRNA2T00068642001	BnaC02g42930D	1.83808	2.24783	1.19008	0.400091	0.981481	0.431824	2.14937	2.22458
GSBRNA2T00072343001	BnaC05g14950D	0.859374	1.15954	1.60852	1.07736	0.110668	0.161738	1.52903	1.61007
GSBRNA2T00063067001	BnaA06g17110D	9.47912	8.91687	9.73714	8.24192	3.77094	3.54926	3.28776	3.27698
GSBRNA2T00037775001	BnaA08g31150D	17.2586	19.0337	16.5064	18.7027	5.2248	7.26852	13.3414	13.7146
GSBRNA2T00121189001	BnaA01g03890D	0.162231	0.038442	0.130498	0.288352	0	0.048752	0.119188	0.281075
GSBRNA2T00005735001	BnaA09g07300D	1.43222	1.34271	1.20999	0.901493	1.65645	2.66522	0.761226	1.05821
GSBRNA2T00034697001	BnaC06g11160D	4.0427	3.98052	3.49783	3.12991	1.49768	1.4623	1.91316	2.23636
GSBRNA2T00049406001	BnaA03g01940D	4.45391	4.45271	4.62205	4.31951	11.1094	11.4379	6.78946	8.70337
GSBRNA2T00095419001	BnaA10g09580D	0.046369	0.172728	0.053748	0.093551	1.93287	1.6824	0.571252	0.735329
GSBRNA2T00112686001	BnaC07g36200D	0	0	0	0	0	0	0	0
GSBRNA2T00127284001	BnaC08g33720D	0	0	0	0	0.253047	0.388315	0.242883	0.345553
GSBRNA2T00153833001	BnaA05g22710D	13.4294	12.1117	12.0552	10.3865	1.93542	2.25897	2.03933	1.8157
GSBRNA2T00101670001	BnaC03g26390D	0	0	0	0	0.051523	0	0	0
GSBRNA2T00145346001	BnaC08g00290D	0	0	0	0	0	0	0.070606	0
GSBRNA2T00091427001	BnaCnng16680D	1.95961	1.97108	1.85902	1.8702	0.825324	0.918308	2.83386	2.8649
GSBRNA2T00117704001	BnaC02g38000D	0.398307	0.517791	0.475679	0.404098	0.741498	0.478668	0.812039	0.814519
GSBRNA2T00145291001	BnaC08g00710D	0	0	0	0	0	0	0	0
GSBRNA2T00133666001	BnaC07g28900D	19.4978	19.5493	20.1813	19.6294	19.0949	19.479	37.2511	37.4782
GSBRNA2T00125987001	BnaC01g25620D	2.454	3.0614	4.97961	0.124431	0	0	0	0.118309
GSBRNA2T00128199001	BnaA07g05120D	0	0	0	0	0.190688	0	0	0
GSBRNA2T00146820001	BnaC02g31970D	0	0	0	0	0	0	0	0
GSBRNA2T00005842001	BnaC08g08780D	0.046459	0.110195	0.180312	0.127756	0.140721	0	0.239954	0.256368
GSBRNA2T00145257001	BnaC08g00960D	2.70114	3.45322	3.50153	4.13264	2.02894	2.22337	2.54332	3.04121
GSBRNA2T00074328001	BnaC05g40730D	13.6501	13.4131	13.3379	13.1352	5.11932	5.03469	7.66586	6.61735
GSBRNA2T00155812001	BnaC08g28460D	5.15479	4.84628	7.8133	6.4765	12.0367	13.4962	6.02243	6.0993
GSBRNA2T00030283001	BnaUnng05190D	0	0	0	0	0	0	0	0
GSBRNA2T00082316001	BnaA04g14570D	0	0.244333	0.243294	1.04061	0.238022	0	0.118586	0
GSBRNA2T00086600001	BnaA10g29750D	57.0643	57.009	58.0061	60.9118	32.2318	31.7938	68.8678	63.6067
GSBRNA2T00056110001	BnaC01g28810D	2.77851	2.36142	2.85428	2.35055	1.19556	1.16483	1.82136	1.84
GSBRNA2T00083896001	BnaCnng62320D	47.9381	52.2733	66.2535	65.3651	0.346599	0.421131	3.42535	3.91812
GSBRNA2T00049656001	BnaC06g31800D	53.9254	57.2758	47.1031	44.1165	23.3265	23.4844	16.6687	16.4509
GSBRNA2T00114735001	BnaC02g08250D	0	0	0	0	6.89981	10.9223	3.77138	2.35433
GSBRNA2T00005995001	BnaAnng02920D	0	0	0	0	0	0	0	0
GSBRNA2T00150187001	BnaC03g46670D	0	0	0	0	0	0	0	0
GSBRNA2T00132321001	BnaC03g18970D	5.26059	4.99888	5.6052	5.08911	0.719481	0.770497	0.804223	1.43878
GSBRNA2T00146079001	BnaC09g04730D	52.2027	49.2606	53.4771	53.5599	6.36709	8.39239	12.2502	10.1288
GSBRNA2T00155126001	BnaC04g47050D	86.7561	77.3864	83.4278	81.1371	14.7483	16.2263	14.1047	13.0453
GSBRNA2T00149183001	BnaA04g01280D	93.1889	92.0604	83.5047	98.8084	16.6265	16.7202	21.7166	14.9047
GSBRNA2T00102904001	BnaA08g22330D	8.75452	9.40183	11.4271	12.3521	1.11047	0.754855	1.27818	1.50518
GSBRNA2T00030502001	BnaA07g37290D	9.72356	8.96701	7.75471	7.90156	0.746862	1.01758	1.303	0.590417
GSBRNA2T00002623001	BnaA01g23760D	0	0	0	0	0.116818	0	0.19793	0.419464
GSBRNA2T00012342001	BnaC01g23880D	0	0	0.148764	0	0	0	0	0
GSBRNA2T00124484001	BnaA07g25620D	1.00159	1.10364	1.02299	0.904639	0.741095	0.721035	0.750954	0.599402
GSBRNA2T00133595001	BnaC07g29480D	0	0	0	0	0	0	0	0
GSBRNA2T00025303001	BnaCnng33900D	0.232315	0.350544	0.138676	0.212589	2.56093	2.30063	2.32565	2.98354
GSBRNA2T00001368001	BnaA02g05660D	11.7449	14.1246	14.2438	15.8868	2.05712	2.31483	2.69891	2.52771
GSBRNA2T00033900001	BnaCnng37910D	3.66994	3.71022	3.62918	3.47168	4.14102	3.81801	3.04341	3.20404
GSBRNA2T00151244001	BnaA03g41760D	1.58029	1.38686	1.28384	1.43876	20.0953	19.0373	11.5062	11.2778
GSBRNA2T00054043001	BnaA01g19400D	0.325935	0.63512	0.307998	0.856147	33.6723	35.9514	36.4465	33.4892
GSBRNA2T00009681001	BnaC09g31600D	0	0	0	0	0	0	0	0
GSBRNA2T00113228001	BnaC02g27770D	0	0	0	0	0	0	0	0
GSBRNA2T00136505001	BnaA10g26940D	0	0	0	0	0	0	0	0
GSBRNA2T00008703001	BnaC08g47840D	0	0	0	0	0	0	0	0
GSBRNA2T00063214001	BnaC06g12510D	0.270711	0.180852	0.346826	0.436454	0.02039	0.092902	0.063838	0.143615
GSBRNA2T00015981001	BnaC09g47590D	0.386363	0.082044	0.362002	0.028093	0.390088	0.13382	0.122516	0
GSBRNA2T00152002001	BnaC02g04030D	1.32682	1.32119	1.37185	1.17557	0.709519	0.238857	0.361164	0.863827
GSBRNA2T00085228001	BnaC03g44460D	0.107623	0.079007	0.088579	0.099904	0.199699	0.326081	0.359732	0.486858
Brassica_napus_newGene_2567	--	0.545902	0.589829	0.395404	0.282248	1.0637	1.49179	4.44319	4.62901
GSBRNA2T00055872001	BnaC03g28020D	0	0	0	0	0	0	0	0
GSBRNA2T00104733001	BnaA05g25540D	7.00399	6.75713	8.44497	7.40599	1.83237	2.50812	2.54721	2.89324
GSBRNA2T00079469001	BnaA08g15530D	2.27112	2.23744	3.64754	3.23809	0.151023	0.151245	0.158267	0.207312
GSBRNA2T00027003001	BnaA05g30310D	1.0999	1.07731	0.912645	1.35159	0.679592	0.768692	0.760296	0.769801
GSBRNA2T00009270001	BnaA05g20130D	4.61626	4.89017	5.39918	4.49477	2.95042	2.54489	2.57026	2.66942
GSBRNA2T00101432001	BnaC03g24540D	0	0	0	0	0	0	0	0
GSBRNA2T00093665001	BnaA03g58760D	0	0	0	0	0	0	0	0
GSBRNA2T00118471001	BnaC02g28190D	17.6714	19.2785	18.9311	18.8222	4.56212	3.97671	6.05026	5.8712
GSBRNA2T00148137001	BnaC06g40170D	32.8595	30.5201	34.8382	34.6255	3.83263	4.36711	3.02284	3.17713
GSBRNA2T00020354001	BnaA09g54990D	0.695457	0.742045	0.772745	0.761551	0.07427	0.085334	0.139901	0.122492
GSBRNA2T00010849001	BnaCnng25230D	0	0	0	0	0	0	0	0
GSBRNA2T00090546001	BnaC08g40000D	0.435835	0.230643	0.536233	0.416931	0	0	0.047332	0
GSBRNA2T00003268001	BnaA04g28550D	0	0	0	0	0	0	0	0
GSBRNA2T00045280001	BnaA04g15830D	0.726471	0.79927	0.294374	0.208341	0	0	0	0
GSBRNA2T00095998001	BnaAnng32410D	0	0	0	0	0.352619	0.172892	0.040193	0.099387
GSBRNA2T00138654001	BnaA01g21330D	0	0	0	0	0	0	0	0.110799
GSBRNA2T00092299001	BnaC06g12410D	2.54617	2.94199	2.55999	2.44451	3.11028	2.60982	1.94416	2.60065
GSBRNA2T00106185001	BnaC05g38380D	16.1283	16.3344	19.6631	20.8581	0	0	0	0
GSBRNA2T00077292001	BnaA06g23240D	0	0	0	0	0	0	0	0
GSBRNA2T00032634001	BnaC09g39480D	0	0	0	0	0	0	0	0
GSBRNA2T00142856001	BnaC07g25360D	2.21263	0.336204	0	0	0	0	0.26442	1.84569
GSBRNA2T00124790001	BnaA03g18350D	0	0	0	0	0	0	0	0
GSBRNA2T00134915001	BnaC09g07700D	2.84962	2.8719	3.82435	3.81424	0.734181	0.727761	0.836605	0.513134
GSBRNA2T00115852001	BnaC09g10620D	0.14772	0.195747	0.08713	0.137638	0	0.022223	0.0652	0.079049
GSBRNA2T00009054001	BnaC04g11320D	0	0	0	0	0	0	0	0
GSBRNA2T00081011001	BnaCnng61050D	0.490493	0.26858	0.298977	0.660786	0.033663	0.186508	0.263656	0.245969
GSBRNA2T00030911001	BnaA02g25910D	11.798	10.6739	5.85311	5.20589	8.98571	8.10547	19.0061	16.5793
GSBRNA2T00088584001	BnaA04g24390D	4.20572	3.08197	2.0508	2.43285	5.97244	5.79579	3.75001	3.30509
GSBRNA2T00134902001	BnaC09g07610D	0	0	0	0.166117	0	0	0.129763	0.157395
GSBRNA2T00089755001	BnaA08g28600D	0.057236	0.20616	0	0	0	0	0.751251	0.345482
GSBRNA2T00130812001	BnaC01g04040D	6.10788	7.10386	6.32258	7.41167	5.56633	5.57507	4.00672	5.24417
GSBRNA2T00090275001	BnaA04g12010D	20.8452	10.3477	8.08425	5.54213	32.3102	11.3309	10.3225	10.3349
Brassica_napus_newGene_12861	--	0	0	0	0	4.416	4.02213	0.11444	0
GSBRNA2T00120631001	BnaC02g38910D	1.07594	1.11242	1.38787	1.29009	3.77988	3.29941	1.58434	1.91193
GSBRNA2T00016396001	BnaA02g34790D	5.04871	4.48972	4.62121	4.82791	1.27264	1.04272	2.06451	2.45096
GSBRNA2T00011701001	BnaC03g73530D	8.53665	8.97899	10.8754	10.0136	7.76342	8.61497	5.91033	6.2321
GSBRNA2T00093049001	BnaA10g06500D	4.06521	3.8744	5.14192	4.86048	2.95888	3.22551	2.14433	2.78681
GSBRNA2T00005795001	BnaA09g06840D	0	0	0	0	0	0	0	0
GSBRNA2T00144514001	BnaA06g31040D	0	0	0	0	0	0	0	0
GSBRNA2T00027744001	BnaA05g35360D	23.0471	24.2975	21.7574	22.0432	0	0	0	0
GSBRNA2T00109156001	BnaC08g24040D	32.3179	31.4228	41.0447	39.7925	24.6369	24.2116	29.2706	36.3069
GSBRNA2T00076699001	BnaC08g10880D	8.20507	8.96799	8.42333	8.28011	3.78293	3.38924	2.64882	3.25048
GSBRNA2T00012928001	BnaA02g08590D	0	0	0	0	0	0	0	0
GSBRNA2T00121366001	BnaA01g02320D	1.51829	1.57661	1.97243	1.04782	0.289754	0.17035	0.218056	0
Brassica_napus_newGene_1329	--	9.59214	7.6096	8.8886	8.13406	3.05424	3.0235	1.87928	2.13457
GSBRNA2T00110366001	BnaC04g23250D	6.42293	6.89505	6.48288	6.59073	2.96705	3.25166	1.61433	2.37534
GSBRNA2T00105654001	BnaC07g09030D	4.25633	4.20575	3.76358	4.22158	2.27271	3.48357	5.65131	4.49068
GSBRNA2T00033218001	BnaA07g09720D	0	0	0	0	0	0	0	0
GSBRNA2T00115271001	BnaC07g22520D	17.3393	18.2789	12.4862	13.1175	11.0387	12.214	9.11792	8.34291
GSBRNA2T00040262001	BnaA05g18250D	3.45723	2.26779	3.29117	2.76967	2.11564	2.33869	5.4299	3.7905
GSBRNA2T00096412001	BnaCnng19000D	0.551698	0	0.344675	0.300664	0.400334	0.125224	0.532819	0.646655
GSBRNA2T00037422001	BnaC03g64780D	0.043058	0	0.035087	0	0	0	0	0
GSBRNA2T00057948001	BnaA06g10870D	0.193976	0.199407	0.288944	0.178955	0	0	0	0.026444
GSBRNA2T00086964001	BnaA02g29310D	1.29086	0.45387	0.779402	0.584006	0	0.033874	0.06471	0.291114
GSBRNA2T00047224001	BnaA08g26860D	1.50265	1.50487	0.924178	1.30262	0.443121	0.324349	0.336286	0.481734
GSBRNA2T00096437001	BnaA10g13610D	0	0	0	0	0	0	0	0
GSBRNA2T00093021001	BnaA09g42290D	0.26268	0.444584	0.593958	0.524133	1.85695	1.04594	6.83832	7.58426
GSBRNA2T00140087001	BnaC08g07860D	8.23506	10.755	8.42823	10.6723	5.9802	5.33561	12.3208	9.50851
GSBRNA2T00124960001	BnaC03g48070D	110.718	118.651	136.505	133.942	55.9195	51.2512	46.126	48.1278
GSBRNA2T00021495001	BnaC07g31530D	0.749177	0.612404	0.540824	0.839518	0.396122	0.311263	0.287998	0.354251
GSBRNA2T00041371001	BnaCnng06190D	1.46886	1.72819	1.76893	1.89488	0.115225	0.21135	0.353895	0.238759
GSBRNA2T00020853001	BnaC09g51830D	0	0	0	0	0	0	0	0
GSBRNA2T00141145001	BnaC04g08970D	23.0514	21.286	26.3901	23.5873	63.2989	59.9372	29.3101	30.1024
GSBRNA2T00009466001	BnaA09g03830D	39.6447	36.304	43.9799	43.8438	3.77017	4.77134	9.84369	10.957
GSBRNA2T00012771001	BnaC08g14570D	0.901106	0	0.916184	0	0	0.949383	0	0
GSBRNA2T00064769001	BnaAnng04860D	0	0	0	0	0	0	0	0
GSBRNA2T00036487001	BnaCnng40710D	0	0.111592	0.056187	0.052144	0.112772	0.042818	0	0
GSBRNA2T00071647001	BnaAnng06130D	1.15972	1.35955	1.0508	0.939315	22.0686	20.463	49.0086	44.7016
GSBRNA2T00141897001	BnaA03g16030D	0	0	0	0	0	0	0	0
GSBRNA2T00141860001	BnaA03g16310D	5.90204	5.82281	5.54509	6.30976	7.43943	7.88801	3.48438	3.84317
Brassica_napus_newGene_4853	--	1.52778	1.92884	2.76014	1.18265	0	0	0	0
GSBRNA2T00006321001	BnaC01g20150D	10.5839	11.2192	10.2345	11.1618	3.30612	3.04784	3.85952	3.22069
GSBRNA2T00155406001	BnaC08g31570D	23.7066	21.3737	29.7228	23.7908	35.1657	35.5508	31.9632	29.1438
GSBRNA2T00107521001	BnaC05g33860D	0.137856	0.132045	0.241233	0.279072	0.213122	0	0.210557	0.035086
GSBRNA2T00146911001	BnaC02g31570D	35.6842	34.9651	44.7756	40.8274	11.5759	12.0669	20.1015	16.9384
GSBRNA2T00148676001	BnaA03g10120D	0	0	0	0	2.92077	2.66264	15.7509	11.2205
GSBRNA2T00105143001	BnaC04g41080D	0	0	0	0	0	0	0	0
GSBRNA2T00144399001	BnaA06g30040D	3.94207	3.56389	4.1927	4.2834	0.872415	0.567739	2.09621	1.96218
GSBRNA2T00110943001	BnaC05g42630D	0.242655	0.190308	0.051182	0.177829	0.27525	0.101276	0.145397	0.185217
Brassica_napus_newGene_5477	--	15.0328	13.4765	12.8652	13.0612	4.85367	5.91088	6.35712	6.89735
GSBRNA2T00044278001	BnaA03g48640D	39.9428	42.2357	34.8466	37.6752	24.7021	25.373	14.6608	16.528
GSBRNA2T00140179001	BnaC03g04650D	0	0	0	0	0	0	0	0
GSBRNA2T00079263001	BnaC03g49190D	38.1459	35.5094	44.9818	41.1311	30.7258	33.9205	13.55	15.5284
GSBRNA2T00123792001	BnaC03g39150D	10.4029	11.4347	12.9122	13.7125	4.13658	6.64121	10.0548	7.3359
GSBRNA2T00112719001	BnaC04g30970D	0	0	0	0	0	0	0	0
GSBRNA2T00003138001	BnaCnng68200D	0.875744	1.21756	1.01165	0.716087	73.2473	65.7969	16.2859	22.4901
GSBRNA2T00105825001	BnaC06g16510D	0	0	0	0	0	0	0	0
GSBRNA2T00056438001	BnaA09g11210D	70.6432	71.1795	68.6168	74.2575	35.6675	37.6786	36.5834	36.3987
GSBRNA2T00145966001	BnaC09g03900D	0.700316	0.559857	0.891445	0.646522	0.123146	0.128609	0.358776	0.490572
GSBRNA2T00140609001	BnaC03g08190D	0	0	0	0	0	0	0	0
GSBRNA2T00133662001	BnaC07g28940D	0	0	0	0	0	0	0	0
GSBRNA2T00095963001	BnaCnng18860D	2.1646	1.85154	1.89279	1.89321	1.45991	1.53557	0.586488	1.30148
GSBRNA2T00131441001	BnaA01g10100D	6.67153	6.7051	6.93577	6.89194	4.58168	4.98246	3.05194	3.18304
GSBRNA2T00078715001	BnaC02g02780D	1.72959	1.58913	2.31568	2.16113	0.956559	1.07397	0.236503	0.397363
GSBRNA2T00116437001	BnaA02g15830D	6.92516	8.72988	5.48202	5.55162	2.72192	2.88862	2.53583	2.4095
GSBRNA2T00049589001	BnaA09g40750D	10.7886	10.7461	9.81878	10.1337	4.95427	4.89173	5.00725	4.99159
GSBRNA2T00103378001	BnaC06g34000D	1.14013	0.594282	0.127457	0.836827	0.231061	0.224781	0.108409	0.277068
GSBRNA2T00042290001	BnaC09g52340D	12.8825	11.6543	11.3153	11.1265	8.64313	7.50108	7.40375	9.23537
GSBRNA2T00095681001	BnaC03g65690D	2.08752	2.00465	0.561116	0.701245	0	0	0	0
GSBRNA2T00041818001	BnaC07g32800D	0	0	0	0	0.013639	0	0	0
GSBRNA2T00131295001	BnaA01g08900D	21.8534	22.3519	22.506	24.5089	7.82364	8.06708	17.0331	20.4164
GSBRNA2T00134221001	BnaC03g00810D	23.3713	23.7611	22.3129	29.2014	9.05288	8.94245	15.9733	12.5825
GSBRNA2T00128005001	BnaC08g03270D	0	0	0	0	0	0	0	0
GSBRNA2T00004109001	BnaA05g32670D	0	0	0	0	0	0	0	0
GSBRNA2T00031624001	BnaC09g42880D	14.1517	10.9785	10.0316	8.73908	0	0	0	0
GSBRNA2T00121683001	BnaC08g20600D	0	0	0	0	0	0	0	0
GSBRNA2T00146293001	BnaA07g35480D	5.11547	4.76937	3.82602	4.34128	7.02005	5.40899	6.1426	5.96473
GSBRNA2T00113731001	BnaA09g26130D	7.80771	7.75385	7.4891	7.69437	5.46428	5.75846	2.61869	3.94714
Brassica_napus_newGene_12196	--	2.89117	3.46611	3.28401	3.23959	1.48006	1.78905	1.66233	1.91129
GSBRNA2T00040906001	BnaCnng43150D	1.83705	1.75426	2.08254	1.99869	0.388998	0.472748	0.787781	1.05506
GSBRNA2T00065057001	BnaCnng08630D	0.042211	0	0	0.035068	0	0	0	0
GSBRNA2T00122713001	BnaC02g13050D	0.911461	0.603427	1.04101	0.891981	0.306318	0.346219	1.2793	0.775793
GSBRNA2T00040962001	BnaCnng43390D	0	0	0	0	0	0	0	0
GSBRNA2T00082763001	BnaC03g16450D	8.08874	7.62263	10.2322	12.0626	1.13863	0.839957	6.03008	4.70265
GSBRNA2T00104002001	BnaC09g45880D	15.9331	15.206	15.1864	16.6436	19.9784	18.5355	11.7073	12.6322
GSBRNA2T00022305001	BnaA05g33590D	0	0	0	0	0	0	0	0
GSBRNA2T00114304001	BnaA04g09510D	11.8278	10.2293	5.86823	6.20396	1.67175	2.46469	11.0434	8.70818
GSBRNA2T00090110001	BnaC02g34220D	23.2145	22.3196	21.2692	20.6489	13.1821	12.1512	9.72971	11.5286
GSBRNA2T00071271001	BnaC06g14660D	2.21761	2.95344	3.97408	3.08114	1.64454	2.08597	2.84743	1.91396
GSBRNA2T00055854001	BnaC02g43380D	20.077	21.7405	36.8674	51.8887	1.56137	2.06393	1.88476	1.09167
GSBRNA2T00044758001	BnaA03g49980D	5.24978	5.2619	3.89895	4.26163	2.64129	2.24906	2.52445	2.40791
GSBRNA2T00134366001	BnaC03g02050D	56.3013	53.2361	56.5368	58.7696	34.2307	30.7972	36.9523	44.8572
GSBRNA2T00106032001	BnaC05g39450D	0	0	0	0	0	0	0	0
GSBRNA2T00131827001	BnaC06g20760D	34.9875	35.5668	33.9573	36.0943	54.6395	57.1961	34.0275	39.0445
GSBRNA2T00021505001	BnaC07g31460D	0	0	0	0	0	0	0	0
GSBRNA2T00010486001	BnaA06g38240D	0.499587	1.01895	1.28809	1.23925	0	0	0	0
GSBRNA2T00117105001	BnaA05g08170D	7.83922	6.93668	6.82908	5.46102	0	0	0	0
Brassica_napus_newGene_8002	--	0.733436	0.558138	0.336674	0.313362	0	0	0	0.032136
GSBRNA2T00055751001	BnaAnng22970D	0.42979	0.576458	0.30377	0.204471	0	0	0	0
GSBRNA2T00070387001	BnaC07g16490D	2.99525	3.21791	2.82777	1.82871	0.082424	0.046943	0.028673	0.033557
GSBRNA2T00062460001	BnaCnng07880D	7.95399	7.73009	9.37367	8.53227	0.29552	0.554551	0.643179	0.970837
GSBRNA2T00060659001	BnaC03g12610D	0	0	0	0	0	0	0	0
GSBRNA2T00132337001	BnaC03g19110D	0	0.063485	0.16286	0.094108	0	0	0	0
GSBRNA2T00142173001	BnaA03g13740D	0.492109	0.521659	1.48581	0.985185	0.594449	0.520738	0.290155	0.426366
GSBRNA2T00065932001	BnaA10g16730D	0	0.012166	0	0	0	0.02636	0.032783	0.014761
GSBRNA2T00045411001	BnaCnng46090D	0	0	0	0	0	0	0	0
GSBRNA2T00145870001	BnaC03g52810D	0	0	0	0	0	0	0	0
GSBRNA2T00122737001	BnaC02g13220D	0	0	0	0	0	0	0	0
Brassica_napus_newGene_9185	--	6.59655	5.40313	6.69731	5.26529	0.055759	0.021652	1.98656	1.06319
GSBRNA2T00031907001	BnaC05g03470D	6.40945	6.09945	6.49723	6.6521	7.19222	7.10634	2.41312	3.84861
GSBRNA2T00132820001	BnaA05g01980D	0.365272	0.45714	0.713355	0.420596	0.242811	0.075475	0.149629	0.252297
GSBRNA2T00039724001	BnaA01g34640D	1.88851	2.02767	2.01248	2.51142	0.845361	0.834273	3.43851	2.5092
GSBRNA2T00069104001	BnaC06g05290D	10.0031	10.7717	11.3445	12.269	3.53656	4.23705	5.06411	5.82493
GSBRNA2T00105859001	BnaC06g16770D	1.28237	1.32761	1.15741	0.905925	0.02227	0.143328	0.137694	0.297171
GSBRNA2T00059336001	BnaC09g37570D	0.41596	0.710739	0.862773	0.794142	0	0.041768	0	0
GSBRNA2T00078937001	BnaA10g07290D	1.47486	1.58253	1.79633	1.70008	1.93783	2.57058	0.975985	1.04707
GSBRNA2T00113601001	BnaA03g39770D	1.88208	2.27282	1.54961	2.16647	0.276422	0.277993	1.00677	0.41251
GSBRNA2T00069919001	BnaC02g33060D	0	0	0	0	0	0	0	0
GSBRNA2T00107050001	BnaC09g48980D	15.4026	15.3367	14.0209	14.2027	15.1801	14.5171	11.0095	13.8093
GSBRNA2T00148381001	BnaC04g17250D	0	0.078942	0.047519	0.067262	0	0	0	0
GSBRNA2T00003310001	BnaC08g46210D	0.33739	0.31938	0.347611	0.46587	39.6292	38.1867	26.1852	29.1884
GSBRNA2T00049057001	BnaC06g23430D	0.452132	0	0.585419	0.18916	0.141907	0.456084	0.235333	0.167701
GSBRNA2T00032761001	BnaC09g11440D	1.32603	1.66421	1.33453	1.97754	1.5432	1.85293	0.780894	1.32999
GSBRNA2T00022495001	BnaCnng75050D	0	0	0	0	0	0	0	0
GSBRNA2T00135498001	BnaA10g18530D	2.17546	2.04909	2.66111	2.64948	5.557	6.61255	5.87984	6.46334
GSBRNA2T00067390001	BnaC09g21570D	0	0.051997	0	0	0	0	0	0
GSBRNA2T00150641001	BnaA08g18630D	1.27535	2.54741	3.22745	2.20571	0	0	0.144009	0.384804
GSBRNA2T00112963001	BnaC06g28510D	0	0	0	0	0	0	0	0
GSBRNA2T00090830001	BnaC01g23520D	0	0	0	0	0	0	0	0
GSBRNA2T00089636001	BnaA08g27520D	0.504471	0.317821	0.536233	0.282128	1.62575	2.01609	0.958133	0.585494
GSBRNA2T00077454001	BnaA07g01690D	0	0	0	0	0	0	0	0
GSBRNA2T00099436001	BnaA07g22170D	9.2606	8.43722	8.01538	7.87716	2.92879	3.13649	3.50752	3.48859
GSBRNA2T00072249001	BnaA02g27680D	2.27096	1.44227	2.16011	1.79699	7.33799	5.98665	4.32101	4.52553
GSBRNA2T00089794001	BnaA08g28920D	0	0	0	0	0	0	0	0
GSBRNA2T00124002001	BnaC03g40510D	5.82617	6.64471	7.18847	6.77251	8.75558	8.44377	10.2796	13.4741
GSBRNA2T00123803001	BnaC03g39200D	15.0733	16.8075	17.1836	17.6706	6.66621	7.06071	7.61366	7.76615
GSBRNA2T00095809001	BnaC03g44870D	0	0.055955	0	0.050319	1.62993	1.66464	1.70586	1.82783
GSBRNA2T00119222001	BnaC05g16750D	0	0	0.088218	0	0	0	0	0
GSBRNA2T00031283001	BnaC07g34230D	2.13922	1.74192	3.03907	3.29539	0	0.127891	0.549268	0.742075
GSBRNA2T00024599001	BnaA06g00620D	0	0	0	0.161644	0	0	0	0
GSBRNA2T00071148001	BnaC09g24200D	0	0	0	0	0	0	0	0
GSBRNA2T00075792001	BnaC02g19740D	0	0	0	0	0	0	0	0
GSBRNA2T00056952001	BnaA08g04970D	0	0	0	0	0	0	0	0
GSBRNA2T00089357001	BnaC04g22080D	4.00049	4.66845	4.48015	5.03719	1.18425	1.53636	2.03405	1.94144
GSBRNA2T00142272001	BnaC05g21330D	4.17252	3.71057	4.22797	4.32509	12.4689	13.7057	6.36105	6.12182
GSBRNA2T00016433001	BnaC01g44790D	0	0	0	0	0	0.079276	0	0
GSBRNA2T00079530001	BnaA01g13060D	8.82034	5.71846	7.06466	6.67938	0.313422	0.326179	0.461478	0.418335
GSBRNA2T00032522001	BnaC03g70520D	8.92203	7.52412	6.07136	7.43549	0.143298	0.079269	0.347539	0.508875
GSBRNA2T00033690001	BnaCnng78430D	0	0	0	0	0	0	0	0
GSBRNA2T00057195001	BnaC04g19960D	0	0	0	0	0	0	0	0
GSBRNA2T00033660001	BnaAnng17470D	0.078712	0.098167	0.050057	0.045783	0.06116	0.033674	0.011329	0.012011
GSBRNA2T00074288001	BnaA09g28440D	5.39057	5.71488	4.50866	5.06543	0.494544	0.624191	1.5662	2.18453
GSBRNA2T00048205001	BnaCnng48670D	0	0	0	0	0	0	0	0
GSBRNA2T00030714001	BnaA03g56720D	7.6901	7.43263	8.01811	7.67127	21.3702	19.6401	15.0795	15.9663
GSBRNA2T00036591001	BnaA02g19190D	5.10699	3.61429	4.46607	3.74206	1.20123	1.42051	2.10428	1.63527
GSBRNA2T00047527001	BnaA02g34000D	7.90989	8.67047	7.11242	7.95939	41.8945	40.367	55.6127	46.5583
GSBRNA2T00064680001	BnaA10g05610D	0	0	0	0	0	0	0	0
GSBRNA2T00129997001	BnaA03g04980D	0	0	0	0	0	0	0	0
GSBRNA2T00103628001	BnaC06g35970D	5.12131	6.11928	4.51746	5.83356	1.61285	1.70158	2.66828	2.90098
GSBRNA2T00040505001	BnaC02g19270D	0	0	0	0	0	0	0	0
GSBRNA2T00149142001	BnaA04g01590D	0.514255	0.316828	0.38951	0.417364	0.190154	0.030713	0.159587	0.186489
GSBRNA2T00101790001	BnaC05g35930D	0	0	0	0	0	0	0	0.108274
GSBRNA2T00088469001	BnaAnng30650D	0.425182	0.312007	0.041717	0.259821	0.758027	0.59285	0.510566	0.24999
GSBRNA2T00105020001	BnaC04g41820D	1.57037	1.69423	1.14864	0.977678	0	0	0	0
GSBRNA2T00003075001	BnaA10g11680D	1.51214	1.27695	0.505494	0.717765	11.2172	10.674	25.6788	26.2891
GSBRNA2T00018585001	BnaC01g39240D	14.7793	12.8017	11.4034	11.4104	0.994234	1.15194	2.98797	3.11565
GSBRNA2T00135530001	BnaA10g18780D	7.97637	9.74476	6.74433	8.14289	1.36435	1.72974	1.74719	0.980176
GSBRNA2T00154541001	BnaC07g39800D	2.0746	2.13264	1.76341	1.99971	0.32884	0.387244	0.603532	0.479214
GSBRNA2T00126797001	BnaA08g10000D	0.275779	0.301819	0.350237	0.427348	0.239847	0.093245	0.11179	0.141936
GSBRNA2T00039587001	BnaCnng42530D	0.323076	0.310573	0.065379	0.136696	3.86269	2.8953	2.5917	2.92763
GSBRNA2T00064582001	BnaA04g19780D	32.7469	38.0579	74.4519	75.1386	0.055334	0.059877	0	0
GSBRNA2T00111687001	BnaA03g30890D	0	0	0	0	0	0	0	0
GSBRNA2T00077918001	BnaC02g23690D	0.371957	0.349189	0.382374	0.26509	0.36449	0.930722	1.16613	0.936654
GSBRNA2T00026632001	BnaCnng04630D	3.11694	3.21312	3.62043	3.11735	1.3316	1.93289	3.32161	4.09681
GSBRNA2T00066607001	BnaA07g28730D	5.74359	5.97326	4.39044	4.27031	0.735915	0.730986	1.10952	0.850371
GSBRNA2T00058950001	BnaC01g21180D	19.4961	19.8123	17.9558	19.1246	11.4055	11.3202	15.1311	10.9253
GSBRNA2T00071251001	BnaC09g23730D	25.712	25.3097	21.8005	23.2119	32.7452	30.1382	19.1933	23.6382
GSBRNA2T00008206001	BnaC03g77840D	0.032117	0	0.025998	0.036799	0	0	0	0
GSBRNA2T00083526001	BnaCnng13700D	8.62538	8.84433	7.77462	8.50299	4.7666	3.82928	2.38143	3.55726
GSBRNA2T00004713001	BnaC06g42910D	1.37247	1.08581	1.7683	1.11924	0.37105	0.446974	0.526793	0.495975
GSBRNA2T00082860001	BnaC01g28200D	1.05076	1.00081	1.1968	1.19381	0.589068	0.468233	0.389822	0.409456
GSBRNA2T00152366001	BnaC09g27300D	0	0	0	0	0	0	0	0
GSBRNA2T00032990001	BnaC05g25490D	0	0	0	0	0	0	0	0
GSBRNA2T00120785001	BnaC07g00690D	1.08368	1.14613	1.46548	1.20909	0.764817	0.580727	0.686199	0.886243
GSBRNA2T00010259001	BnaA01g36320D	0	0	0	0	0	0	0	0
Brassica_napus_newGene_6777	--	21.4343	23.2483	20.6785	24.3941	4.59573	4.60664	4.86007	5.20355
GSBRNA2T00095007001	BnaA08g04000D	4.31943	3.69618	4.64755	3.47106	2.10446	2.31892	1.94761	1.77647
GSBRNA2T00086420001	BnaA02g33030D	0.823539	1.2475	0.975108	0.895116	0	0	0	0
GSBRNA2T00154066001	BnaA10g13720D	6.66006	6.08591	5.86002	5.70066	16.9232	17.6409	9.87456	10.6491
GSBRNA2T00156517001	BnaA09g23770D	2.51055	2.53702	2.31428	1.85121	0.209994	0.153186	0.340227	0.336968
GSBRNA2T00114073001	BnaA08g00570D	2.04118	1.97108	1.59097	1.73205	3.20037	2.7041	4.66725	4.80297
GSBRNA2T00053748001	BnaC06g06850D	0	0.071641	0	0	0	0	0	0
GSBRNA2T00074130001	BnaA05g10970D	0	0	0	0	0	0	0	0
GSBRNA2T00071168001	BnaC09g24060D	4.38877	4.18618	4.49549	4.52584	2.12702	1.62128	0.950456	1.4408
Brassica_napus_newGene_5391	--	29.0634	23.8556	22.2847	17.2553	3.1333	18.295	25.4016	7.61663
GSBRNA2T00024505001	BnaC03g17020D	0	0	0	0	0	0	0	0
GSBRNA2T00003252001	BnaC02g45760D	0	1.82489	0	0	0	0	0	0
GSBRNA2T00062851001	BnaC03g71510D	0	0	0	0	0	0	0	0
GSBRNA2T00128467001	BnaA07g07010D	7.06986	7.43782	8.19985	5.84683	1.80574	3.10727	2.72035	2.17828
GSBRNA2T00136467001	BnaA10g26630D	0.449239	1.09797	1.49265	0.897168	0	0	0	0.142093
GSBRNA2T00030802001	BnaA02g26660D	2.27101	1.57622	10.6048	9.73851	0	0.055457	1.70274	1.77731
GSBRNA2T00066422001	BnaC02g22960D	0.323519	0.052415	0.026188	0.146789	0	0	0	0
GSBRNA2T00111018001	BnaC05g42010D	6.98021	6.3762	14.3771	15.8341	41.8549	39.6516	24.1281	29.9847
GSBRNA2T00132936001	BnaA05g01060D	1.46769	1.12132	0.755875	0.579116	75.8427	68.2424	87.8949	77.1389
GSBRNA2T00021544001	BnaC07g31160D	0.035153	0.094543	0.170255	0.305303	0	0.048492	0.405511	0.564345
GSBRNA2T00103828001	BnaC02g30640D	0	0	0	0	0	0	0	0
GSBRNA2T00118421001	BnaC02g28380D	0	0	0	0	0	0	0	0
GSBRNA2T00099247001	BnaA07g20680D	0	0	0	0	0.854176	0.744016	0.843328	1.02677
GSBRNA2T00129469001	BnaA09g33590D	0.260046	0.336444	0.171523	0.114515	0	0	0	0
GSBRNA2T00000983001	BnaC08g11780D	7.29466	6.70434	4.6549	4.34724	36.401	35.0317	14.1254	14.0364
GSBRNA2T00156625001	BnaA09g24370D	0.928302	1.07434	1.17683	1.09385	0.832108	0.922958	0.652511	0.698866
GSBRNA2T00031929001	BnaC05g03660D	0	0	0	0	0	0.23971	0.113672	0.079802
GSBRNA2T00101601001	BnaC03g25860D	0.067087	0.172121	0	0.101953	0	0	0.037993	0.145613
GSBRNA2T00029319001	BnaA02g21890D	33.0899	30.7962	35.9073	40.5207	12.2122	12.3541	21.5486	19.7977
GSBRNA2T00130856001	BnaC01g03730D	14.8181	15.7644	15.594	16.095	3.80123	4.06665	7.40622	5.85382
GSBRNA2T00031785001	BnaC08g44470D	1.86583	1.69383	1.83717	1.06615	2.88106	2.87983	2.57675	3.2434
GSBRNA2T00149673001	BnaA01g14680D	0.088202	0	0	0	0	0	0.181524	0
GSBRNA2T00075502001	BnaC03g23860D	0	0	0.065257	0	0.080158	0	0	0
GSBRNA2T00055045001	BnaC08g19740D	1.85265	1.66667	2.26357	2.78669	1.09278	1.56234	2.12386	3.10555
GSBRNA2T00114977001	BnaC02g10880D	0	0	0	0	0	0	0	0
GSBRNA2T00127490001	BnaC08g35360D	4.47345	4.08935	3.12313	4.04103	3.08318	2.78979	3.2083	3.13696
GSBRNA2T00000909001	BnaC08g11330D	0	0	0	0.248273	0	0	0	0
GSBRNA2T00034426001	BnaAnng41970D	0	0	0	0	0	0	0	0
GSBRNA2T00079609001	BnaA09g31040D	39.8268	34.9125	38.2878	34.4372	8.99591	12.1937	14.9555	11.8432
GSBRNA2T00083159001	BnaC02g17260D	0	0	0	0	0	0	0	0
GSBRNA2T00009481001	BnaA09g03950D	0.882106	0.72104	0.614766	0.655487	0.715233	0.714154	2.05562	1.40725
GSBRNA2T00119349001	BnaC05g18750D	0	0	0	0	0	0	0	0
GSBRNA2T00145360001	BnaC08g00240D	8.17879	7.39335	8.86174	8.28571	1.97111	3.29418	8.72201	3.73636
GSBRNA2T00072041001	BnaCnng58120D	0	0	0	0	0.024325	0	0	0
GSBRNA2T00079136001	BnaC03g21350D	2.05183	2.48796	2.11572	2.4706	1.58815	2.12894	1.43405	2.19677
GSBRNA2T00071748001	BnaC01g31350D	0.871405	0.463214	0.817447	0.385694	0.990784	0.689382	1.20269	0.903053
GSBRNA2T00056657001	BnaCnng52520D	0.349319	0.443334	0.496137	0.313381	0	0.198494	0.268852	0.137066
GSBRNA2T00151285001	BnaA03g41430D	23.5425	19.1762	17.8031	17.4515	2.82379	3.77632	7.34818	5.7525
GSBRNA2T00151379001	BnaA03g23860D	0.095602	0.206521	0.116079	0.025194	0	0.056991	0	0
GSBRNA2T00073042001	BnaA08g20440D	1.61091	1.78239	2.20375	1.9354	0	0	0.018774	0
GSBRNA2T00015093001	BnaA08g25770D	27.5099	19.4467	12.8646	10.8355	1.70366	1.83982	3.99495	3.49687
GSBRNA2T00136582001	BnaC08g39370D	2.3561	2.5568	3.44074	3.92253	0.305974	0.363261	2.80204	2.67883
Brassica_napus_newGene_966	--	3.7216	2.67756	2.04415	1.05563	0	0.100115	0.732955	0.582592
GSBRNA2T00066738001	BnaA03g12880D	0	0	0	0.186882	0.249357	0	0	0
GSBRNA2T00070566001	BnaA09g13740D	0.028366	0	0.022961	0	0	0	0	0
GSBRNA2T00077134001	BnaA04g28960D	0	0	0	0	4.88203	6.0632	4.59934	5.67673
GSBRNA2T00135476001	BnaA10g18330D	8.88463	8.75406	7.5196	7.2155	2.7268	2.79178	5.49563	6.26954
GSBRNA2T00029890001	BnaCnng36750D	27.2123	25.9824	14.6785	14.6979	0.126971	0.036696	0.600461	0.339973
GSBRNA2T00000157001	BnaA05g26390D	0	0	0	0	0	0	0	0
GSBRNA2T00134435001	BnaC03g02570D	0	0	0	0	0	0	0	0
Brassica_napus_newGene_12330	--	4.7699	4.6369	4.60915	4.81457	4.58226	3.92235	2.45634	3.01738
GSBRNA2T00085281001	BnaC03g44790D	2.29368	2.25582	3.63643	5.00332	2.5191	2.12327	46.1651	39.9155
GSBRNA2T00064848001	BnaC04g31250D	0.479461	0.47698	1.1572	1.31086	1.95509	1.93863	2.25734	2.70404
GSBRNA2T00018806001	BnaA06g36540D	4.99046	5.03115	5.63951	5.818	4.73165	4.61795	3.37612	4.22285
GSBRNA2T00100153001	BnaC07g46290D	0	0	0	0	0	0	0	0
GSBRNA2T00066819001	BnaUnng02550D	0	0	0	0	0.215536	0.16678	0	0
GSBRNA2T00062020001	BnaC05g10080D	0	0	0	0	0	0	0.030246	0
GSBRNA2T00125574001	BnaA05g13710D	0.134557	0	0	0.110421	0.216347	0	0	0
GSBRNA2T00040979001	BnaCnng43430D	12.4801	11.0899	16.855	18.3236	0.217605	0.219853	0.578913	0.147144
GSBRNA2T00070209001	BnaA02g13510D	9.69877	8.85583	10.9944	10.8712	4.98753	5.284	14.2981	13.2409
GSBRNA2T00058035001	BnaA09g17860D	0.254224	0	0.311384	0.259345	0	0	0	0
GSBRNA2T00136216001	BnaA10g24560D	57.4524	64.1125	47.7333	41.8268	0.107678	0	1.44479	2.41958
GSBRNA2T00036956001	BnaA08g07600D	0	0	0	0	0	0	0	0
GSBRNA2T00068157001	BnaC05g11290D	1.45082	1.33678	1.21088	0.973749	3.08673	3.13628	1.96348	2.04635
GSBRNA2T00131585001	BnaA01g11210D	3.96276	2.71345	2.85854	2.18678	2.01506	2.18061	3.2591	1.26708
GSBRNA2T00020614001	BnaC03g73180D	4.21531	4.13159	13.4729	13.035	0.41425	0.525314	3.27169	3.07399
GSBRNA2T00145738001	BnaC03g52030D	0	0	0	0	0	0	0	0
GSBRNA2T00054855001	BnaC06g29880D	0	0	0	0	0	0	0	0
GSBRNA2T00030028001	BnaAnng17170D	0	0	0	0	0	0	0	0
GSBRNA2T00060931001	BnaAnng02080D	1.17259	0.965556	1.27985	1.65249	10.0863	10.6731	10.1598	8.6499
GSBRNA2T00001915001	BnaA06g35130D	4.77607	4.6718	4.55942	4.55876	5.10509	4.39058	2.16308	2.69048
GSBRNA2T00155426001	BnaC08g31410D	2.17721	2.18429	2.3095	1.94238	0.41513	0.356352	0.617213	0.777971
GSBRNA2T00134586001	BnaC03g03880D	7.62339	8.6936	8.46553	8.12731	20.0142	24.1229	27.6418	22.1099
Brassica_napus_newGene_9195	--	0.381775	0.490695	0.744687	0	0	0.185962	0.20377	0.250449
GSBRNA2T00052790001	BnaA02g07990D	5.37974	5.49012	5.31041	5.40074	3.42239	3.76305	2.82811	3.12444
GSBRNA2T00149872001	BnaC04g35760D	21.3838	20.127	17.652	17.2146	10.0321	8.69112	8.99585	11.0109
GSBRNA2T00132325001	BnaC03g19000D	55.0277	63.6441	62.864	59.3427	5.02696	4.74405	9.41036	5.90171
GSBRNA2T00125055001	BnaC03g47420D	0	0	0	0	0	0	0	0
GSBRNA2T00137144001	BnaC02g21850D	1.47794	0.9393	1.2961	0.651256	2.02344	2.3713	2.45699	1.29002
GSBRNA2T00147436001	BnaA06g26180D	0	0	0	0	0	0	0	0
GSBRNA2T00008624001	BnaCnng24470D	0	0	0	0	0.696015	0.406826	0.963818	1.25742
GSBRNA2T00016442001	BnaC05g50240D	0	0	0	0	0	0	0	0
GSBRNA2T00153866001	BnaA05g22420D	99.4481	103.581	87.536	90.0303	29.6684	26.4328	14.3459	14.2873
GSBRNA2T00101604001	BnaC03g25890D	0	0	0	0	0	0.282087	0.163829	0.37914
GSBRNA2T00004509001	BnaAnng11000D	0	0	0	0	0	0	0	0
GSBRNA2T00125393001	BnaA06g16120D	0.861441	0.619813	0.717706	1.10303	0.346452	0.612994	0.530623	0.424398
GSBRNA2T00157792001	BnaC09g22940D	0	0.17725	0	0	0	0	0	0
GSBRNA2T00146330001	BnaA07g35110D	0.773158	1.16146	1.00086	0.74467	8.83299	7.69829	4.47357	5.68566
GSBRNA2T00041561001	BnaC06g26670D	5.80969	6.12396	6.0342	5.4529	4.65724	4.86798	4.17825	5.27074
GSBRNA2T00126576001	BnaA04g05050D	65.8625	67.4672	72.5098	76.7797	11.1849	14.3893	24.1223	17.3952
GSBRNA2T00010393001	BnaC02g46320D	9.50419	8.5019	14.1957	14.6242	8.62571	8.41233	17.9394	14.8056
Brassica_napus_newGene_13200	--	0.551172	0.285017	0.091237	0	0.464047	0.630095	0.201062	0
GSBRNA2T00128252001	BnaA07g05470D	0	0	0	0	0	0	0	0
GSBRNA2T00046775001	BnaCnng47540D	2.49689	1.97597	1.79668	1.75121	0.234989	0.063111	0.237693	0.486461
GSBRNA2T00130700001	BnaC01g04990D	7.88438	7.02649	6.52009	6.19088	1.9199	0.830723	1.65882	1.14434
GSBRNA2T00016622001	BnaC07g18280D	2.76997	2.9048	3.15084	2.87819	0.059745	0.082249	0.049031	0
GSBRNA2T00021110001	BnaA08g06070D	0	0	0	0	0	0	0	0
GSBRNA2T00041246001	BnaCnng43920D	2.32082	1.64791	2.10935	1.62182	0.354208	0.533134	0.672949	0.830592
GSBRNA2T00122575001	BnaC06g11600D	0.270998	0.316416	0.239179	0.09468	0.134149	0.15727	0.058304	0
GSBRNA2T00023395001	BnaUnng04820D	0.384642	0.422988	0.25247	0.175709	0.264193	0.204997	0.144337	0.214412
GSBRNA2T00033592001	BnaC06g05750D	0	0	0	0	0.219844	0.08597	0.081386	0.038661
GSBRNA2T00030868001	BnaA02g26200D	0	0	0	0	0.016626	0.150868	0.01677	0.027819
GSBRNA2T00145776001	BnaC03g52260D	2.56899	0.800772	0	0	0	0	0	0
GSBRNA2T00001515001	BnaC03g62890D	3.34809	3.20063	2.61564	2.44768	1.42095	1.40465	3.19786	1.55676
GSBRNA2T00094554001	BnaA09g20750D	2.64494	2.76879	2.48154	2.4384	0.16183	0.155766	0.145495	0.379252
GSBRNA2T00022371001	BnaCnng32130D	0	0	0	0	0	0	0	0
GSBRNA2T00020291001	BnaC07g49930D	0	0	0	0	0	0	0	0
GSBRNA2T00086304001	BnaA10g03420D	0	0	0	0	0	0	0	0
GSBRNA2T00128058001	BnaC08g03550D	0.816142	0.636597	0.676335	0.461485	0.317617	0.115267	0.309911	0.232545
GSBRNA2T00119507001	BnaC05g17810D	0.352184	0.154654	0.302963	0	0	0.066688	0	0
GSBRNA2T00001359001	BnaA02g05570D	3.14871	3.58081	2.90449	3.70309	1.72252	1.71836	1.86423	1.47367
GSBRNA2T00132174001	BnaC03g17780D	8.19943	7.78536	7.16643	7.34323	45.0969	45.701	27.3119	27.534
GSBRNA2T00150463001	BnaA10g01130D	0	0	0.03456	0	0	0	0	0
GSBRNA2T00150469001	BnaA10g01070D	4.31187	3.83342	4.39243	3.96999	2.56676	2.82608	2.46758	2.73103
GSBRNA2T00082376001	BnaA05g15000D	0.050751	0.109632	0.04108	0	0	0	0	0
GSBRNA2T00111156001	BnaC05g40950D	0	0	0	0	0	0	0	0
GSBRNA2T00045311001	BnaC03g73960D	0	0	0	0	0	0	0	0
GSBRNA2T00021285001	BnaA01g18530D	0	0.0251	0	0.017839	0.165431	0.218164	0.358352	0.585635
GSBRNA2T00115092001	BnaC02g10120D	0.643994	0.311041	0.497094	0.511102	0.152093	0.345642	0.190994	0.358155
GSBRNA2T00015997001	BnaC09g47470D	4.03756	4.22438	4.15632	3.43764	23.1808	22.6408	14.7669	15.8563
GSBRNA2T00151370001	BnaA03g23780D	0	0	0	0	0	0	0	0
GSBRNA2T00102236001	BnaC02g14810D	1.44317	0.978583	1.03193	1.09318	2.28038	2.69921	1.70309	1.23608
GSBRNA2T00104105001	BnaC09g45050D	0.746239	1.9092	0.190497	0.34492	0.34609	0.345228	0	0.397412
GSBRNA2T00106106001	BnaC05g38950D	23.5475	24.5943	24.4542	23.9848	6.27851	6.93843	6.84656	6.66327
GSBRNA2T00122029001	BnaA09g36370D	0.31826	0.266287	0.458649	0.748202	0.093657	0.014537	0.160973	0.22697
GSBRNA2T00028551001	BnaCnng77490D	3.27003	3.87016	4.99388	4.21031	0.652387	0.466519	0.610286	0.675062
GSBRNA2T00097201001	BnaC06g24390D	1.30359	2.17821	0.375675	0.794191	0	0.160277	0.073917	0.21434
GSBRNA2T00130670001	BnaC01g05260D	0.152349	0.062172	0	0.217056	0.060249	0	0.669199	0.703167
GSBRNA2T00079155001	BnaC03g21230D	0	0.03188	0.060226	0	0	0	0	0.019653
GSBRNA2T00146187001	BnaC09g05620D	1.90597	2.02376	2.38725	2.91172	2.52657	1.84706	3.55238	4.08802
Brassica_napus_newGene_13970	--	0.797877	1.04405	0.520378	0.694582	0.035974	0.080014	0.18608	0.129909
GSBRNA2T00115078001	BnaC02g10240D	7.4336	10.4139	10.6862	11.2798	3.85695	5.04081	6.7675	5.74359
GSBRNA2T00123556001	BnaCnng02120D	5.66789	5.50206	4.24356	4.70307	6.12677	6.61637	5.58028	4.44161
GSBRNA2T00115677001	BnaC09g19640D	0	0	0	0	0	0	0	0
GSBRNA2T00098615001	BnaA07g15390D	2.47155	3.13518	1.38009	1.04306	4.68721	5.36989	7.49286	6.20428
GSBRNA2T00005463001	BnaA04g21260D	0.272313	0.624947	0.590491	0.278349	0.064369	0	0.387968	0.180366
GSBRNA2T00038532001	BnaA05g31420D	25.3771	24.6254	22.7892	20.593	44.6456	44.4183	17.3973	20.5422
GSBRNA2T00009071001	BnaC04g11210D	0	0	0	0	0	0	0	0
GSBRNA2T00141667001	BnaC03g50440D	21.1155	22.9559	17.9875	19.6066	13.522	12.2344	13.1244	13.2975
GSBRNA2T00142978001	BnaC07g26250D	32.508	31.0417	31.2325	39.9324	9.77937	12.3727	26.4064	14.6996
GSBRNA2T00125106001	BnaC03g36150D	0	0	0	0	0	0	0	0
GSBRNA2T00039954001	BnaA01g06240D	2.407	2.80517	2.92852	2.69201	0.384913	0.914575	1.60625	1.49066
GSBRNA2T00121174001	BnaA01g04000D	24.4135	22.7298	19.8228	19.6316	69.215	67.9879	11.7583	13.7584
GSBRNA2T00057247001	BnaA01g33030D	7.15393	7.14578	7.47459	7.34873	10.5944	10.4178	5.36804	6.52621
GSBRNA2T00030897001	BnaA02g26010D	0	0	0	0	0	0.078237	0	0
GSBRNA2T00070553001	BnaA09g13840D	0	0.023804	0.023786	0	71.2584	70.0842	45.536	50.4447
GSBRNA2T00035931001	BnaC01g42850D	0	0	0	0	0	0	0	0
GSBRNA2T00093268001	BnaA07g03780D	0	0	0	0	0	0	0	0
GSBRNA2T00099579001	BnaA07g23330D	3.05302	3.77539	4.04019	3.25945	1.61465	1.52808	1.40806	1.20754
GSBRNA2T00029742001	BnaA06g39040D	6.12047	4.57533	4.47056	3.93285	1.2759	0.747021	1.43483	1.51184
GSBRNA2T00126071001	BnaC01g26040D	0	0	0.048207	0	0.122936	0.160093	0.221302	0.291486
GSBRNA2T00015353001	BnaA01g33940D	5.86714	5.44698	6.04218	6.60881	1.60201	1.64297	3.0436	2.03718
GSBRNA2T00142545001	BnaC07g08290D	17.0052	15.4694	18.9444	16.0071	12.8459	13.7141	25.9483	20.0912
GSBRNA2T00106126001	BnaC05g38820D	0	0	0	0	0	0	0	0
GSBRNA2T00096098001	BnaC08g15820D	0.626432	0.901917	0.308105	0.444482	0.032384	0	0.021056	0.039554
GSBRNA2T00114237001	BnaA08g01610D	2.8832	3.2222	2.24108	2.26832	10.4158	10.6219	6.51579	7.25527
GSBRNA2T00117593001	BnaC02g37410D	12.3543	12.5158	8.23931	8.35133	4.50117	5.03535	5.65878	5.43608
GSBRNA2T00129920001	BnaA03g04300D	1.1092	1.27086	4.24819	3.73142	8.55538	8.90502	24.1801	23.3234
GSBRNA2T00048790001	BnaC01g15060D	6.01869	5.32284	5.40742	6.02487	40.7622	44.8611	81.7878	88.1625
GSBRNA2T00044358001	BnaA03g49210D	0	0	0	0	0	0	0	0
GSBRNA2T00006457001	BnaA04g19070D	4.15945	3.16183	8.21024	8.36077	19.8309	18.0884	15.2851	15.5078
GSBRNA2T00112468001	BnaA07g12350D	0.906139	0.689167	1.16151	1.41276	0	0	0	0
GSBRNA2T00124263001	BnaC05g26930D	0	0	0	0	0	0	0	0
GSBRNA2T00100099001	BnaC07g45830D	0	0	0	0	0	0	0	0
GSBRNA2T00078260001	BnaA09g43200D	14.8233	14.4556	15.3434	15.0386	7.93987	7.46915	7.75525	9.9462
GSBRNA2T00035607001	BnaA06g13160D	5.94726	6.15821	4.51414	4.9917	0	0	0.070606	0
GSBRNA2T00144961001	BnaC07g05920D	0	0	0	0	0	0	0	0
GSBRNA2T00010435001	BnaCnng24790D	0	0	0	0.258219	0	0	0	0
GSBRNA2T00083039001	BnaAnng29290D	0	0	0	0	0	0	0	0
GSBRNA2T00033322001	BnaA05g14650D	0.34017	0	0	0	0	0	0	0
GSBRNA2T00076207001	BnaA07g07510D	1.476	1.05607	1.0984	1.35209	0.588361	0.603806	1.21588	1.30459
GSBRNA2T00018970001	BnaC03g61510D	0.066744	0.35989	0.099048	0.168879	0	0	0	0
GSBRNA2T00023773001	BnaC05g40160D	13.1751	15.2557	15.8041	14.688	2.73243	3.73887	4.68683	3.23913
GSBRNA2T00145022001	BnaC07g06170D	4.47093	4.42758	3.17578	4.00548	2.18618	2.26132	1.76469	2.09841
GSBRNA2T00125277001	BnaC03g34940D	42.3309	40.0308	45.9685	46.0755	4.01727	3.66704	3.18476	2.31268
GSBRNA2T00063915001	BnaC02g33830D	7.93878	7.05307	6.20453	8.10309	6.3982	6.00211	4.69738	5.5965
GSBRNA2T00019074001	BnaC03g23140D	1.20623	1.62543	1.42962	0.50166	0.165161	0.125418	0.455021	0.132914
GSBRNA2T00091608001	BnaA09g09930D	0.15666	0.235744	0.392428	0.303122	0.159326	0.019838	0.312969	0.200014
GSBRNA2T00028468001	BnaUnng05110D	0	0	0	0	0	0	0	0
GSBRNA2T00063051001	BnaA06g16980D	6.16102	5.80132	10.8236	12.1686	10.062	11.2133	10.077	11.3992
GSBRNA2T00145644001	BnaA09g22640D	2.89809	2.68306	0.108944	0.425918	0	0	0	0
GSBRNA2T00087245001	BnaCnng14980D	0	0	0	0	0	0	0	0
Brassica_napus_newGene_11697	--	0.449592	0.335362	0.681281	0.772805	0.299451	0.599614	0.650373	0.743526
GSBRNA2T00123764001	BnaC03g38920D	2.75677	2.8693	3.1854	3.08245	2.27674	1.86684	0.956961	1.31048
GSBRNA2T00069903001	BnaC02g33200D	0	0	0	0	0	0	0	0
GSBRNA2T00124386001	BnaA07g24800D	3.27503	4.05415	3.23425	3.60444	1.98076	2.79201	2.08687	1.60389
GSBRNA2T00043642001	BnaA01g18890D	2.26263	1.20617	2.32883	1.33359	17.3909	19.3536	20.4366	18.3195
GSBRNA2T00150778001	BnaA08g17650D	10.4222	11.4734	12.3811	12.2062	3.19048	4.30092	7.73866	7.94924
GSBRNA2T00083028001	BnaCnng61820D	0	0	0	0	0	0	0	0
GSBRNA2T00029737001	BnaAnng16960D	0	0	0	0	0	0	0.155495	0
GSBRNA2T00073164001	BnaA06g22900D	5.01987	4.94557	4.14647	3.69739	1.78976	1.47414	4.26295	2.76115
GSBRNA2T00040614001	BnaA06g19380D	0	0	0	0	0.592299	0.069565	0.128165	0.16249
GSBRNA2T00091072001	BnaA08g02840D	0.331944	0.125284	0.228822	0.15254	0.452162	0.268058	0	0.185269
GSBRNA2T00072711001	BnaA01g12550D	0	0.192911	0.238183	0	0	0	0	0
GSBRNA2T00063398001	BnaA02g24680D	0	0	0	0	0	0	0	0
GSBRNA2T00117828001	BnaA09g19320D	2.66515	2.86255	3.06764	2.5852	0.55717	0.831319	0.832851	1.32045
Brassica_napus_newGene_1726	--	0	0	0.152347	0.331194	0	0	0.410855	0
GSBRNA2T00127657001	BnaC04g38720D	0	0	0	0	0.351816	0.305691	0.122794	0.115242
GSBRNA2T00044063001	BnaC03g78090D	10.9147	9.80193	11.9491	13.5635	1.08001	1.38076	5.39225	4.4022
GSBRNA2T00021177001	BnaA06g02470D	3.99061	4.59603	4.53448	3.48986	2.87375	3.2118	3.08478	2.9084
GSBRNA2T00061713001	BnaC08g09320D	3.13746	3.76515	4.24675	4.42683	0	0	0.837911	0.673186
GSBRNA2T00059362001	BnaC09g37740D	76.8709	78.9974	80.5571	79.6759	0	0	0	0
GSBRNA2T00073955001	BnaA01g05350D	0	0	0	0	0	0	0	0
GSBRNA2T00151152001	BnaA03g42560D	13.1048	13.2021	9.47767	10.4652	6.9607	5.91977	8.2995	8.12091
GSBRNA2T00012634001	BnaC07g11890D	26.8301	27.5737	44.2832	42.8011	9.03355	8.24018	28.2168	24.1854
Brassica_napus_newGene_1418	--	0	0	0	0	0.379295	0.191056	0.155332	0.115675
GSBRNA2T00132380001	BnaC03g19430D	0.110117	0.036053	0.033426	0	0.186621	0.191032	1.22793	1.20796
GSBRNA2T00032471001	BnaC03g70950D	0	0	0	0	0	0	0	0
GSBRNA2T00035549001	BnaA06g13580D	6.24186	6.17525	7.51956	7.70931	2.60342	3.35586	4.40291	4.44188
GSBRNA2T00079634001	BnaC01g22150D	5.46078	6.87819	10.0145	9.70486	9.27674	9.19546	14.3942	10.8737
GSBRNA2T00103001001	BnaA08g23160D	0	0	0	0	0	0	0	0
GSBRNA2T00138849001	BnaA03g22120D	1.35061	1.18732	3.18785	2.89419	0.210814	0.106376	0.040159	0
GSBRNA2T00061787001	BnaC07g13200D	2.32564	2.11431	1.93325	1.69343	328.299	395.653	206.825	163.625
GSBRNA2T00141767001	BnaC03g49700D	2.26205	2.21258	1.77313	2.03647	0.717211	0.549062	0.967559	1.29711
GSBRNA2T00130214001	BnaA03g06870D	2.90299	2.10583	1.64341	2.01503	2.66537	2.2395	1.8314	1.65339
GSBRNA2T00104986001	BnaA05g23480D	0.456858	0.049278	0.123187	0.461333	0	0	0.092443	0
GSBRNA2T00141110001	BnaC03g12300D	2.88638	3.4762	2.32209	3.0092	0.259565	0.399205	0.944505	0.569078
GSBRNA2T00148292001	BnaC04g16770D	0	0	0	0	0	0	0	0
GSBRNA2T00156921001	BnaC07g36690D	1.80839	1.90445	1.67025	2.05041	1.36405	1.15713	1.03676	1.26374
GSBRNA2T00054150001	BnaAnng04320D	0	0	0	0	0	0	0	0
GSBRNA2T00140847001	BnaC03g10200D	0.766023	1.26459	1.21571	0.615913	0.17239	0	0.074101	0.148643
GSBRNA2T00021354001	BnaC03g41140D	0	0	0	0	0	0	0	0
GSBRNA2T00030344001	BnaCnng37180D	0	0	0.065393	0	0	0	0	0
GSBRNA2T00002248001	BnaC04g03150D	0	0	0	0	0	0	0	0
GSBRNA2T00114028001	BnaA02g23340D	17.1985	17.9879	15.0388	16.178	5.95622	6.64077	9.21109	7.11115
GSBRNA2T00099811001	BnaC07g43430D	9.66982	11.6828	10.3805	10.9596	10.7891	11.8053	11.4266	9.88369
GSBRNA2T00154776001	BnaA03g36430D	0	0	0	0	0	0	0	0
GSBRNA2T00142752001	BnaC07g07400D	0	0	0	0	0	0	0	0
GSBRNA2T00029100001	BnaC06g03970D	0	0	0	0	0	0	0	0
GSBRNA2T00130766001	BnaC01g04420D	0.229252	0.092162	0.66276	0.925381	0	0	0	0
GSBRNA2T00139571001	BnaC08g18290D	0	0	0	0	0	0	0	0
GSBRNA2T00099252001	BnaA07g20720D	10.0041	9.34749	10.2461	10.9803	5.21561	4.65077	5.64193	5.11899
GSBRNA2T00029765001	BnaA02g06910D	26.6092	28.5536	30.2572	37.6408	3.39131	4.17692	16.0021	13.7799
GSBRNA2T00129218001	BnaA09g31510D	9.4058	9.39405	7.35316	9.71872	5.25583	7.50814	9.17549	8.41573
GSBRNA2T00103642001	BnaC06g36090D	0	0	0	0	0	0	0	0
GSBRNA2T00016623001	BnaC07g18290D	0	0	0	0	0	0	0	0
GSBRNA2T00028253001	BnaAnng16560D	3.60608	3.56772	3.77402	3.64131	4.24666	4.24493	2.94849	2.98441
GSBRNA2T00074046001	BnaC04g01100D	0.249139	0.205956	0.102899	0.140293	0.129678	0	0	0.298088
GSBRNA2T00021634001	BnaC09g18780D	11.1158	10.082	6.80728	5.89813	5.20158	5.08001	4.10282	3.74204
GSBRNA2T00040786001	BnaCnng42950D	0	0	0	0	0	0	0	0
GSBRNA2T00145103001	BnaC08g02010D	0.153824	0.254617	0.104895	0.212426	0.041692	0.102534	0.067467	0.056708
GSBRNA2T00047634001	BnaA07g03470D	0.37679	0.088747	0.178175	0.203158	0.357159	0.37717	0.236005	0.235336
GSBRNA2T00107676001	BnaC01g11830D	3.37402	3.31815	2.99218	3.13056	1.81904	1.77983	1.25399	1.78473
GSBRNA2T00097449001	BnaAnng10690D	7.53177	7.70257	6.41487	7.04384	27.5611	26.6918	22.7645	25.2789
GSBRNA2T00040600001	BnaA06g19460D	0	0	0	0	0.314249	0.053412	0.099414	0.049519
GSBRNA2T00136536001	BnaC08g39780D	31.4143	27.3261	26.1874	27.2044	0.087588	0.074363	7.78213	7.75885
GSBRNA2T00095730001	BnaC03g65400D	2.68685	3.16238	3.10286	2.82004	1.39942	1.2624	2.92766	3.32922
GSBRNA2T00119818001	BnaC03g28570D	0	0	0	0.089389	0	0	0	0
GSBRNA2T00154402001	BnaA10g16430D	8.35674	8.48953	7.44985	7.75882	8.61627	8.25208	4.74666	4.81527
GSBRNA2T00117085001	BnaA05g07990D	0.514296	0.398939	0.328493	0.279307	0.060235	0	0.180317	0.272318
GSBRNA2T00135033001	BnaC09g08590D	47.767	48.6822	44.0074	44.4395	45.462	44.6626	39.4298	38.9899
GSBRNA2T00123491001	BnaCnng01550D	0	0	0	0	0.080154	0.147041	0.056529	0.067284
GSBRNA2T00133026001	BnaA05g00350D	116.116	118.473	109.464	124.323	19.8513	18.4907	31.0962	22.9793
GSBRNA2T00087314001	BnaCnng15150D	4.72329	2.03059	3.42179	3.35174	6.67861	8.61997	7.02351	8.34316
GSBRNA2T00104390001	BnaA02g21110D	0	0	0	0	0	0	0	0
GSBRNA2T00065846001	BnaC01g10230D	14.316	15.7859	13.2617	12.9009	10.2737	9.41729	8.69613	8.67429
GSBRNA2T00109433001	BnaC09g03340D	0	0	0	0	0	0	0	0
GSBRNA2T00018994001	BnaC03g61620D	0.921247	1.04487	0.453875	0.872538	1.76948	2.03677	1.37356	1.20226
GSBRNA2T00135727001	BnaA10g20460D	4.35636	4.63052	3.5374	3.64326	1.17518	2.12115	2.50592	2.23841
GSBRNA2T00019613001	BnaC04g53220D	0	0	0	0	0	0	0	0
GSBRNA2T00118667001	BnaA07g13270D	6.38629	6.2274	7.34673	7.33059	2.76492	2.82233	4.23813	2.61437
GSBRNA2T00156875001	BnaC07g36320D	2.9159	2.9188	3.11741	2.59549	3.50573	2.65724	1.91987	2.35899
GSBRNA2T00153415001	BnaC03g31170D	0.128237	0.131648	0.208119	0.089073	0.644236	0.910425	0.111844	0.064568
GSBRNA2T00102215001	BnaC02g14980D	2.2652	1.71233	1.986	1.50367	2.48814	2.13794	1.67392	1.35878
GSBRNA2T00008934001	BnaC05g09000D	9.00279	9.13888	9.14258	10.2681	13.0659	14.1011	7.45518	8.36837
GSBRNA2T00141390001	BnaC04g10560D	4.39258	4.66982	6.13717	6.50947	0.155409	0.069803	2.17157	2.64584
GSBRNA2T00104156001	BnaC09g44630D	0.36487	0.432398	0.338863	0.241575	2.56247	3.39501	1.01005	1.78288
GSBRNA2T00095615001	BnaC09g20860D	0	0	0	0	0	0	0	0
GSBRNA2T00140534001	BnaC03g07600D	4.5023	4.24321	6.2767	6.34953	0	0	0	0
GSBRNA2T00112055001	BnaA03g27790D	18.2187	18.7812	16.8472	17.6119	6.20224	8.0313	6.20814	5.66092
GSBRNA2T00021318001	BnaA01g18730D	2.89332	2.95111	3.53868	3.25532	1.86417	1.91996	1.02052	1.39662
GSBRNA2T00017039001	BnaC09g41470D	97.0325	91.427	91.7771	103.829	42.6438	49.1784	57.4897	47.9567
GSBRNA2T00033755001	BnaA09g53130D	16.4236	16.7728	17.8784	15.3055	9.4298	8.31444	11.8274	11.0503
GSBRNA2T00047832001	BnaA10g13500D	0	0	0	0	0	0	0	0
GSBRNA2T00069733001	BnaC09g14360D	0	0	0	0	0	0	0	0
GSBRNA2T00146091001	BnaC09g04840D	2.88375	3.42475	3.53915	3.0355	0.795923	0.439866	0.667296	0.474293
GSBRNA2T00065910001	BnaA10g16920D	5.93991	5.25912	5.63861	5.24033	4.64316	4.20584	3.20687	3.9939
GSBRNA2T00105116001	BnaC04g41300D	4.05897	3.33219	2.78179	3.00388	237.907	273.501	222.573	196.237
GSBRNA2T00083312001	BnaA04g14260D	0.661137	0.62014	0.504636	0.975125	0.135437	0.157167	0.047937	0.082516
GSBRNA2T00039453001	BnaUnng00860D	6.66987	2.38998	0.994482	1.29574	32.0098	29.8925	44.3705	24.4648
GSBRNA2T00155670001	BnaC08g29530D	0.068658	0.319635	0.247866	0.144264	0	0.076816	0.309616	0.504119
GSBRNA2T00031425001	BnaC07g33200D	6.56445	7.34762	7.38999	8.77979	0.715358	0.670312	1.10618	1.65151
GSBRNA2T00036681001	BnaC09g36400D	5.05628	4.85948	2.80135	3.83187	0.154969	0.129949	0.629767	0.30785
GSBRNA2T00003876001	BnaCnng21250D	2.43496	2.43037	2.7074	1.89545	0.486399	0.861047	1.58778	1.47889
GSBRNA2T00120732001	BnaC07g00970D	0	0	0	0	0	0	0	0
GSBRNA2T00136684001	BnaC08g38500D	1.89156	1.74556	1.93756	2.55775	1.42044	1.85989	3.00604	2.44298
GSBRNA2T00055818001	BnaC02g43600D	32.8497	35.9931	29.7931	37.7695	6.05602	12.4472	8.87552	3.89672
GSBRNA2T00094579001	BnaA09g20920D	1.81162	1.69059	1.45523	1.39656	0.236129	0.182439	0.616346	0.78329
GSBRNA2T00095001001	BnaA08g03950D	0	0	0	0	0	0	0	0
GSBRNA2T00004948001	BnaA10g29540D	5.68045	5.80253	5.04378	6.92591	4.77493	3.80755	7.45415	5.73456
GSBRNA2T00005780001	BnaA09g06960D	3.65918	2.96182	5.54799	6.99063	24.2171	21.0904	32.8539	17.4732
GSBRNA2T00008990001	BnaC04g11670D	0.161771	0	0.234081	0.094216	0	0	0	0
GSBRNA2T00085886001	BnaCnng14310D	21.1498	20.6214	25.9276	29.9642	6.14765	6.74284	10.9665	7.4315
GSBRNA2T00014014001	BnaCnng72260D	54.6023	49.4794	58.3659	52.8607	5.80753	7.3227	3.0479	3.22566
GSBRNA2T00147398001	BnaA06g25880D	11.6519	9.93194	13.9346	13.9313	3.38101	3.16547	4.2302	4.69785
GSBRNA2T00011539001	BnaA07g37400D	0	0	0.120447	0	0	0	0	0
GSBRNA2T00108173001	BnaC04g34140D	0	0	0	0	0	0	0	0
GSBRNA2T00003596001	BnaC06g43430D	0.588799	0.406777	0.361487	0.447358	0	0	0	0
GSBRNA2T00033777001	BnaA08g30660D	0	0.076477	0	0	0.117196	0	0	0.28559
GSBRNA2T00121706001	BnaC08g20810D	0	0	0.156075	0	0	0	0.84363	0.743791
GSBRNA2T00041111001	BnaCnng43780D	1.83794	1.47441	1.44976	0.839807	0.645586	0.413381	1.35959	0.670697
GSBRNA2T00072062001	BnaCnng58140D	0.44818	0.321582	0.820903	0.567231	0	0.057739	0	0
GSBRNA2T00086462001	BnaC09g14280D	0	0	0	0	0	0	0	0
GSBRNA2T00104719001	BnaA05g25670D	2.80884	3.01529	2.41605	2.3173	13.3576	12.8165	5.4698	4.86239
GSBRNA2T00081489001	BnaAnng28950D	0	0	0	0	0.122148	0.162503	0.125197	0.049785
GSBRNA2T00032694001	BnaC09g39920D	176.737	184.866	180.741	187.186	20.313	18.6991	31.6268	41.6875
GSBRNA2T00157502001	BnaC01g18010D	8.90484	9.73115	17.873	17.1749	1.38545	1.1106	6.13706	6.28812
GSBRNA2T00139311001	BnaC07g23750D	0.954748	0.929148	0.852449	0.978768	58.3347	56.9779	39.9637	40.6177
GSBRNA2T00071689001	BnaAnng06470D	0	0	0	0	0	0	0	0.07578
GSBRNA2T00135680001	BnaA10g20050D	13.4704	12.8331	21.8448	21.1936	8.65515	8.30833	22.4848	19.1397
GSBRNA2T00011965001	BnaCnng71790D	2.55102	2.68521	3.64276	2.95361	0.025796	0.117533	0.63746	0.683912
GSBRNA2T00101644001	BnaC03g26200D	1.31962	0.640007	1.30178	0.463458	0	0.296065	0.523201	0
GSBRNA2T00095450001	BnaA10g09800D	0	0	0	0	0.969341	0.339982	1.0894	0.620321
GSBRNA2T00132506001	BnaC03g20350D	0	0.13519	0	0	0	0	0	0
GSBRNA2T00048498001	BnaA05g12280D	0	0	0	0	0.037078	0	0	0
GSBRNA2T00066382001	BnaC02g23170D	8.44274	7.93863	8.64943	8.46821	4.61723	4.57293	5.07555	5.86813
GSBRNA2T00137614001	BnaA03g33470D	12.1958	12.5712	13.7605	12.0294	2.92274	3.08941	3.09948	3.28482
GSBRNA2T00123170001	BnaA04g24300D	0	0.020367	0.101952	0	0.468747	0.956529	3.22217	3.81355
Brassica_napus_newGene_3019	--	2.00709	1.54456	1.38039	1.63646	0.328603	0.306435	0.996216	1.11102
GSBRNA2T00086364001	BnaA01g27970D	7.73113	6.27551	6.5646	8.64497	0.149833	0.114501	1.70918	1.96126
GSBRNA2T00126054001	BnaC01g25950D	0	0.014936	0	0	0	0	0	0
GSBRNA2T00135996001	BnaA10g22710D	0.242216	0.143753	0.203804	0.171345	0.452975	0.421393	0.715212	0.775958
GSBRNA2T00066996001	BnaA04g13650D	10.9008	9.84772	10.3713	10.6461	3.10482	2.56626	2.00082	2.08969
GSBRNA2T00006728001	BnaCnng22150D	2.33633	2.42538	2.48753	1.43744	1.93242	1.87556	1.28017	1.48097
GSBRNA2T00087700001	BnaC08g04610D	0	0	0	0	0	0	0	0
GSBRNA2T00136553001	BnaC08g39610D	0	0	0	0	0	0	0	0
GSBRNA2T00081486001	BnaCnng61180D	0.629542	0.209938	0.472112	0.434385	0	0.048845	0.038031	0.056204
GSBRNA2T00065240001	BnaAnng24880D	0	0	0	0	0	0	0	0
GSBRNA2T00137644001	BnaA03g33200D	8.0372	7.49802	8.53772	7.10278	6.72037	7.17107	9.98076	7.66328
GSBRNA2T00094597001	BnaA09g06520D	0.838079	1.17374	1.00059	0.99454	3.269	3.11815	2.34104	2.43919
GSBRNA2T00027586001	BnaAnng40660D	0	0	0	0	0	0	0	0
GSBRNA2T00108883001	BnaC08g26020D	0.377256	0.485067	0.376481	0.708218	0.038039	0.044482	0.082055	0.119641
GSBRNA2T00057086001	BnaC08g41920D	0	0	0	0	0	0	0	0
GSBRNA2T00107899001	BnaC09g24810D	12.611	13.5007	12.0226	12.239	6.43711	6.53045	5.78954	5.91854
GSBRNA2T00025295001	BnaA03g55650D	0	0	0	0	0	0	0	0
GSBRNA2T00027608001	BnaC07g51170D	64.7553	59.4921	32.65	27.572	0	0.073207	0.191372	0.259061
GSBRNA2T00119447001	BnaC05g18250D	0.718111	0.516937	0.777194	0.674942	0.279896	0	0	0
GSBRNA2T00110930001	BnaC05g42730D	9.15774	8.23515	9.72822	8.56198	11.7589	11.57	9.14904	10.6934
Brassica_napus_newGene_2570	--	189.83	203.63	156.325	188.853	156.728	154.095	219.933	150.866
GSBRNA2T00015779001	BnaA09g30260D	59.3252	56.624	67.2303	64.8098	28.0625	26.0426	15.4693	21.0805
GSBRNA2T00151950001	BnaC02g04420D	1.54842	1.36038	2.10128	2.02977	0.820668	1.09287	1.90429	1.8523
GSBRNA2T00104973001	BnaA05g23610D	5.50966	5.87049	5.62036	4.8755	3.17418	3.09145	3.59123	3.99901
GSBRNA2T00064756001	BnaAnng04750D	20.5222	18.2789	18.4746	20.3742	14.7703	17.6048	17.038	13.7527
Brassica_napus_newGene_3710	--	2.72389	2.92513	2.24635	3.36697	1.13894	1.61813	3.11574	1.34757
GSBRNA2T00122076001	BnaA09g50240D	7.46578	8.25163	8.42738	8.65065	3.02663	3.17519	3.51021	3.90791
GSBRNA2T00043303001	BnaA03g54230D	5.45496	4.54248	15.0319	17.208	0	0	0	0
GSBRNA2T00092450001	BnaA06g39280D	47.6877	42.4181	27.5078	26.4369	27.1377	27.4083	9.09793	6.34379
GSBRNA2T00083224001	BnaA09g41970D	12.2169	11.2167	10.1915	9.39435	36.2649	32.964	18.4271	21.0464
GSBRNA2T00095715001	BnaC03g65470D	0	0	0	0	0.09393	0	0	0
GSBRNA2T00073809001	BnaA08g06310D	0	0	0	0	0	0	0	0
GSBRNA2T00131471001	BnaA01g10320D	1.74856	1.99243	1.89355	2.32631	0	0	0.317237	0.22694
GSBRNA2T00146605001	BnaA07g32730D	1.36534	1.39668	1.54367	1.58953	0.401034	0.542113	0.563844	0.494289
GSBRNA2T00038356001	BnaA09g27960D	1.50551	1.67356	1.27694	1.17604	0.190088	0.5737	1.16553	1.88335
GSBRNA2T00015088001	BnaA08g25820D	0.030779	0.024934	0	0	0	0	0	0
GSBRNA2T00017800001	BnaA02g35700D	9.02669	9.02565	7.30602	6.17877	0.072187	0	0.033636	0.088167
GSBRNA2T00133935001	BnaC08g05340D	0.270294	0.391894	0.41392	0.893702	0.978965	1.21479	2.13239	1.90114
GSBRNA2T00104585001	BnaC08g12970D	0	0	0	0	0	0	0	0
GSBRNA2T00049334001	BnaA03g01330D	4.11251	3.49879	1.95548	2.60472	0.415748	0.243769	0.58251	0.698791
GSBRNA2T00107268001	BnaA06g18070D	0	0	0	0	0	0	0	0
GSBRNA2T00143391001	BnaA02g01560D	12.0689	12.1604	9.90312	10.1686	0.162022	0.222742	0.332587	0.522824
GSBRNA2T00035370001	BnaC01g23730D	0	0	0	0	0	0	0	0
GSBRNA2T00050699001	BnaC09g28180D	0	0	0.025234	0	0	0	0	0
GSBRNA2T00135312001	BnaC02g18910D	9.21036	8.7503	14.3728	13.1848	2.75674	2.61104	3.08021	3.32676
Brassica_napus_newGene_720	--	4.22358	4.56186	5.61781	5.34936	4.46507	5.10631	5.5249	4.48182
Brassica_napus_newGene_10148	--	4.50719	2.61885	1.22574	2.90358	2.30224	3.43039	1.23466	0.775098
GSBRNA2T00136352001	BnaA10g25720D	6.04806	6.41908	5.76628	6.29507	6.49806	4.89939	3.33213	4.23182
GSBRNA2T00110838001	BnaCnng00780D	0	0	0	0	0	0	0	0
GSBRNA2T00076929001	BnaC09g17510D	2.05658	2.3111	1.5697	1.54628	0	0	0	0
GSBRNA2T00156222001	BnaA06g05020D	8.30667	9.52635	58.3105	59.4425	7.60954	8.38372	85.0236	89.8574
GSBRNA2T00130521001	BnaC01g06500D	0.467344	0.508526	0.04818	0.132777	0.97482	1.00007	0.350647	0.080565
GSBRNA2T00148929001	BnaA03g07980D	7.7305	6.69108	8.67111	7.05568	1.77758	1.78823	4.66343	3.01141
GSBRNA2T00006114001	BnaC04g04380D	0	0	0	0	0	0	0	0
GSBRNA2T00077033001	BnaA04g20100D	4.24379	3.94485	3.82577	3.41772	0.564373	0.411954	0.185183	0.179406
GSBRNA2T00091312001	BnaA09g01720D	0	0	0	0	0	0	0	0
GSBRNA2T00082534001	BnaC02g35240D	0	0.15751	0	0.127538	0	0	0	0
GSBRNA2T00032146001	BnaC05g29810D	0	0	0	0	0	0.016952	0	0
GSBRNA2T00055643001	BnaAnng22820D	1.01694	0.991762	0.836329	1.23064	0	0.096787	0.125658	0.119522
GSBRNA2T00048054001	BnaC09g54760D	12.9811	13.146	15.2554	13.8101	1.70072	1.28397	1.40842	1.63669
Brassica_napus_newGene_10592	--	3.39898	3.08234	3.89797	4.50667	2.8227	3.95657	1.97962	2.68091
GSBRNA2T00116173001	BnaC01g15850D	9.83629	10.0045	9.44944	8.80399	18.8354	17.5142	8.09339	11.1172
GSBRNA2T00117404001	BnaC07g11370D	55.9886	59.3746	56.4065	58.3307	11.6592	15.6623	38.1827	32.997
GSBRNA2T00131703001	BnaA01g12140D	13.0926	13.5744	11.8186	13.0031	8.36208	8.87338	9.64046	8.35289
GSBRNA2T00153513001	BnaC03g31910D	65.5101	62.18	60.7218	57.7392	55.1375	59.3635	52.9436	57.0356
[truncated: 63,536 more rows]
